# Supplementary material for: Qualitative and Quantitative Analysis of Regional Cerebral Free Fatty Acids in Rats Using the Stable Isotope Labeling Liquid Chromatography–Mass Spectrometry Method
Source: Molecules. 2020 Nov 6;25(21):5163. doi: 10.3390/molecules25215163 (PMC7664212; doi:10.3390/molecules25215163)
Supplement: Supplementary file 1 [file molecules-25-05163-s001.xls]

## Sheet: TableS1
No	Time	RI	m/z (DMED-labeled)	m/z (d4-DMED-labeled)	Intensity (cps) DMED-labeled	Formula (DMED-labeled)	Formula (unlabeled)	Name	Molecular weight	KEGG ID	CAS号
1	7.25333	688.029	221.165	225.19	2.06521e+06	C13H21O1N2	C9H10O2	3,4-Dimethylbenzoic Acid	150.068		619-04-5
2	7.67575	700	201.196	205.221	1.64963e+06	C11H25O1N2	C7H14O2	Heptanoic acid	130.099	C17714	111-14-8
3	8.41521	720.769	259.238	263.263	72129.9	C14H31O2N2	C10H20O3	10-Hydroxydecanoic Acid	188.141		1679-53-4
4	8.74561	730.439	215.212	219.237	849452	C12H27O1N2	C8H16O2	2-Ethylhexanoic acid	144.115	-	149-57-5
5	10.424	777.977	213.196	217.221	1.77569e+06	C12H25O1N2	C8H14O2	2-octenoic acid	142.099	C16653	1871-67-6
6	10.4791	779.623	287.233	291.258	72447.5	C15H31O3N2	C11H20O4	Undecanedioic acid	216.136		1852-04-6
7	11.2007	800	215.212	219.237	4.6161e+06	C12H27O1N2	C8H16O2	Caprylic acid	144.115	C06423	124-07-2
8	12.0429	829.098	299.233	303.258	726542	C16H31O3N2	C12H20O4	Dodec-2-endisaeure	228.136		6402-36-4
9	13.0108	862.948	259.238	263.263	140020	C14H31O2N2	C10H20O3	3-Hydroxycapric acid	188.141	-	14292-26-3
10	13.8038	890.424	479.384	483.409	188167	C28H51O4N2	C24H40O5	α-Muricholic Acid	408.288	C00695	2393-58-0
11	14.0822	900	229.228	233.252	4.49044e+07	C13H29O1N2	C9H18O2	Nonanoic acid	158.131	C01601	112-05-0
12	14.2833	908.217	315.264	319.29	65965.4	C17H35O3N2	C13H24O4	1,11-Undecanedicarboxylic acid	244.167		505-52-2
13	15.1264	941.494	463.39	467.415	44088	C28H51O3N2	C24H40O4	(3b,5b,6a)-3,6-dihydroxy-Cholan-24-oic acid	392.293		570-84-3
14	16.2209	985.166	463.39	467.415	289801	C28H51O3N2	C24H40O4	Hyodeoxycholic acid	392.293		83-49-8
15	16.5728	999.258	479.384	483.409	231331	C28H51O4N2	C24H40O5	Cholic acid	408.288	-	81-25-4
16	16.5891	1000	243.243	247.268	9.67198e+06	C14H31O1N2	C10H20O2	Capric acid	172.146	C01571	334-48-5
17	17.6411	1047.46	321.253	325.278	728264	C19H33O2N2	C15H22O3	Gemfibrozil	250.157		25812-30-0
18	17.7175	1050.96	287.269	291.295	110826	C16H35O2N2	C12H24O3	3-Hydroxydodecanoic acid	216.173	-	1883-13-2
19	18.2886	1077.02	255.243	259.268	119098	C15H31O1N2	C11H20O2	trans-2-Undecenoic acid	184.146		15790-94-0
20	18.622	1091.91	463.389	467.414	639125	C28H51O3N2	C24H40O4	Chenodeoxycholic acid	392.293		474-25-9
21	18.7988	1100	257.259	261.284	1.83913e+06	C15H33O1N2	C11H22O2	Undecanoic acid	186.162	C17715	112-37-8
22	19.1585	1119.4	463.39	467.415	148068	C28H51O3N2	C24H40O4	Deoxycholic acid (DCA)	392.293		83-44-3
23	20.6551	1200	271.274	275.299	4.97669e+07	C16H35O1N2	C12H24O2	Lauric acid	200.178	C02679	143-07-7
24	21.5504	1242.79	369.347	373.372	1.59764e+06	C22H45O2N2	C18H34O3	Ricinoleic acid	298.251		141-22-0
25	21.7208	1251.77	371.306	375.331	6.22219e+06	C24H39O1N2	C20H28O2	Dehydroabietic Acid	300.209		1740-19-8
26	21.7764	1254.35	447.395	451.419	101209	C28H51O2N2	C24H40O3	Lithocholic acid	376.298	-	434-13-9
27	22.358	1280.48	391.332	395.357	115439	C24H43O2N2	C20H32O3	(±)11-HETE/12(R)-HETE	320.235		73804-65-6/82337-46-0
28	22.6278	1295.33	297.29	301.315	1.72943e+06	C18H37O1N2	C14H26O2	(5Z)-5-Tetradecenoic acid	226.193		5684-70-8
29	22.7189	1300	285.29	289.315	2.57752e+06	C17H37O1N2	C13H26O2	Tridecanoic acid	214.193	C17076	638-53-9
30	23.8225	1362.46	347.306	351.331	188649	C22H39O1N2	C18H28O2	Stearidonic Acid	276.209	C16300	20290-75-9
31	24.4757	1400	299.305	303.33	9.29781e+07	C18H39O1N2	C14H28O2	Myristic acid	228.209	C06424	544-63-8
32	25.1343	1437.47	349.321	353.346	6.6855e+06	C22H41O1N2	C18H30O2	Alpha-Linolenic acid	278.225	-	463-40-1
33	25.4562	1455.9	373.321	377.346	4.53742e+06	C24H41O1N2	C20H30O2	Eicosapentaenoic Acid	302.225		10417-94-4
34	25.5957	1463.96	325.321	329.346	5.98533e+07	C20H41O1N2	C16H30O2	Palmitoleic Acid	254.225		373-49-9
35	26.2209	1500	313.321	317.346	3.7826e+07	C19H41O1N2	C15H30O2	Pentadecylic acid	242.225	C16537	1002-84-2
36	26.6849	1527.93	351.337	355.361	1.10663e+08	C22H43O1N2	C18H32O2	Linoleic Acid	280.24		60-33-3
37	26.8087	1534.66	375.337	379.362	2.11047e+08	C24H43O1N2	C20H32O2	Arachidonic acid	304.24		506-32-1
38	26.8491	1537.25	399.337	403.362	3.12271e+08	C26H43O1N2	C22H32O2	Docosahexaenoic acid	328.24		6217-54-5
39	27.7691	1588.86	401.352	405.378	6.65957e+06	C26H45O1N2	C22H34O2	Docosapentaenoic acid	330.256	C16513	24880-45-3
40	27.273	1600	327.336	331.361	2.94268e+09	C20H43O1N2	C16H32O2	Palmitic acid	256.24	C00249	57-10-3
41	28.1576	1615.38	377.353	381.377	1.91457e+07	C24H45O1N2	C20H34O2	8,11,14-Eicosatrienoic acid	306.256	C16522	1783-84-2
42	28.5075	1634.07	401.353	405.378	2.34112e+07	C26H45O1N2	C22H34O2	all-cis-4,7,10,13,16-Docosapentaenoic acid	330.256		25182-74-5
43	28.6714	1646.44	353.352	357.377	5.84658e+08	C22H45O1N2	C18H34O2	Oleic acid	282.256	-	112-80-1
44	29.4438	1692.08	403.368	407.393	8.16666e+07	C26H47O1N2	C22H36O2	Adrenic Acid	332.272	C16527	28874-58-0
45	29.5658	1700	341.352	345.377	5.07485e+07	C21H45O1N2	C17H34O2	Margaric acid	270.256	-	506-12-7
46	29.7636	1711.48	379.368	383.393	1.32572e+07	C24H47O1N2	C20H36O2	Eicosadienoic acid	308.272	C16525	2091-39-6
47	30.749	1768.46	405.383	409.409	1.68695e+06	C26H49O1N2	C22H38O2	CIS-13,16,19-DOCOSATRIENOIC ACID	334.287		28845-86-5
48	30.7106	1800	355.368	359.392	2.17208e+09	C22H47O1N2	C18H36O2	Stearic acid	284.2		57-11-4
49	32.7087	1890.29	407.399	411.424	1.39986e+06	C26H51O1N2	C22H40O2	13C,16C-DOCOSADIENOIC ACID	336.303		17735-98-7
50	32.8711	1900	369.384	373.409	3.55592e+06	C23H49O1N2	C19H38O2	Nonadecanoic Acid	298.287		646-30-0
51	34.3611	2000	383.399	387.424	2.87448e+07	C24H51O1N2	C20H40O2	Arachidic acid	312.303	C06425	506-30-9
52	34.7694	2027.97	409.415	413.44	7.39831e+06	C26H53O1N2	C22H42O2	Erucic acid	338.318	C08316	112-86-7
53	35.8389	2100	397.415	401.44	1.03385e+06	C25H53O1N2	C21H42O2	Heneicosanoic acid	326.318	-	2363-71-5
54	37.2022	2200	411.431	415.456	8.17036e+06	C26H55O1N2	C22H44O2	Docosanoic acid	340.334	C08281	112-85-6
55	38.5052	2300	425.447	429.472	2.55755e+06	C27H57O1N2	C23H46O2	Tricosanoic acid	354.35	-	2433-96-7
56	39.6757	2400	439.462	443.487	9.52026e+06	C28H59O1N2	C24H48O2	Tetracosanoic acid	368.365	C08320	557-59-5
57	4.7393	617.677	243.207	247.232	761438	C13H27O2N2	C9H16O3	7-Methyl-3-oxooctanoic acid	172.11	-	-
						C13H27O2N2	C9H16O3	7-Methyl-4-oxo-octanoic acid	172.11	-	-
						C13H27O2N2	C9H16O3	7-Methyl-6-oxo-octanoic acid	172.11	-	-
58	5.034	625.176	259.202	263.227	270573	C13H27O3N2	C9H16O4	3-Methylsuberic acid	188.105	-	34284-35-0
						C13H27O3N2	C9H16O4	Nonanedioic acid	188.105	C08261	123-99-9
						C13H27O3N2	C9H16O4	Nonate	188.105	-	-
						C13H27O3N2	C9H16O4	NONIC ACID	188.105	-	-
59	5.17645	629.162	243.207	247.232	1.72231e+06	C13H27O2N2	C9H16O3	7-Methyl-3-oxooctanoic acid	172.11	-	-
						C13H27O2N2	C9H16O3	7-Methyl-4-oxo-octanoic acid	172.11	-	-
						C13H27O2N2	C9H16O3	7-Methyl-6-oxo-octanoic acid	172.11	-	-
60	5.16296	629.881	245.222	249.248	124534	C13H29O2N2	C9H18O3	3-Hydroxy pelargonic acid	174.126	-	88930-09-0
61	5.55748	639.895	260.176	264.201	1.44647e+06	C15H22ON3	C11H11NO2	3-Indolepropionic acid	189.079	-	830-96-6
62	5.66143	642.938	219.149	223.174	100267	C13H19ON2	C9H8O2	Cinnamic acid	148.052	C10438	621-82-9
						C13H19ON2	C9H8O2	Trans-Cinnamic acid	148.052	C00423	140-10-3
63	5.80079	646.669	271.202	275.227	334646	C14H27O3N2	C10H16O4	3,6-Dioxo-decanoic acid	200.105	-	-
						C14H27O3N2	C10H16O4	5-Pentyltetrahydro-2-oxo-3-furancarboxylic acid	200.105	-	-
						C14H27O3N2	C10H16O4	6,9-Dioxo-decanoic acid	200.105	-	-
						C14H27O3N2	C10H16O4	Alpha-Carboxy-delta-nonalactone	200.105	-	-
						C14H27O3N2	C10H16O4	Matsutakic acid A	200.105	-	-
64	6.43989	664.863	235.181	239.206	1.86677e+06	C14H23ON2	C10H12O2	Eugenol	164.084	C10453	97-53-0
						C14H23ON2	C10H12O2	3-Phenylbutyric acid	164.084	-	4593-90-2
						C14H23ON2	C10H12O2	4-Isopropylbenzoic acid	164.084	C06578	536-66-3
						C14H23ON2	C10H12O2	Benzenebutanoic acid	164.084	-	-
65	6.58574	669.057	231.207	235.232	360025	C12H27O2N2	C8H16O3	3-Hydroxyvalproic acid	160.11	C16651	58888-84-9
66	6.57555	669.917	339.264	343.289	287517	C19H35O3N2	C15H24O4	Acoric acid	268.168	-	5956-06-9
67	6.92585	679.423	245.186	249.211	106786	C12H25O3N2	C8H14O4	2-Propylglutaric acid	174.089	C16658	32806-62-5
						C12H25O3N2	C8H14O4	3-Methylpimelic acid	174.089	-	10200-31-4
						C12H25O3N2	C8H14O4	Ethyladipic acid	174.089	-	-
						C12H25O3N2	C8H14O4	Suberic acid	174.089	C08278	505-48-6
68	7.51516	695.809	265.155	269.18	358662	C14H21O3N2	C10H10O4	Isoferulic acid	194.058	C10470	537-73-5
69	8.05457	710.632	339.264	343.289	436595	C19H35O3N2	C15H24O4	Acoric acid	268.168	-	5956-06-9
70	8.12236	712.52	225.196	229.221	409571	C13H25ON2	C9H14O2	(E)-2,6-Dimethyl-2,5-heptadienoic acid	154.099	-	261949-42-2
						C13H25ON2	C9H14O2	2,6-Nonadienoic acid	154.099	-	-
						C13H25ON2	C9H14O2	2-Nonynoic acid	154.099	-	-
						C13H25ON2	C9H14O2	4-Nonynoic acid	154.099	-	-
						C13H25ON2	C9H14O2	5-Nonynoic acid	154.099	-	-
						C13H25ON2	C9H14O2	6-Nonynoic acid	154.099	-	-
						C13H25ON2	C9H14O2	7-Nonynoic acid	154.099	-	-
						C13H25ON2	C9H14O2	8-Nonynoic acid	154.099	-	-
						C13H25ON2	C9H14O2	C9:2n-2,4	154.099	-	-
						C13H25ON2	C9H14O2	C9:2n-5,7	154.099	-	-
						C13H25ON2	C9H14O2	2E,6Z-Nonadienoic acid	154.099	-	-
						C13H25ON2	C9H14O2	2Z,4E-Nonadienoic acid	154.099	-	-
						C13H25ON2	C9H14O2	5,7-Nonadienoic acid	154.099	-	-
71	8.22389	715.446	243.207	247.232	2.25713e+06	C13H27O2N2	C9H16O3	7-Methyl-3-oxooctanoic acid	172.11	-	-
						C13H27O2N2	C9H16O3	7-Methyl-4-oxo-octanoic acid	172.11	-	-
						C13H27O2N2	C9H16O3	7-Methyl-6-oxo-octanoic acid	172.11	-	-
72	8.35067	719.201	245.223	249.248	92028.7	C13H29O2N2	C9H18O3	3-Hydroxy pelargonic acid	174.126	-	88930-09-0
73	8.37078	720.574	339.264	343.289	141553	C19H35O3N2	C15H24O4	Acoric acid	268.168	-	5956-06-9
74	8.44479	721.698	297.217	301.242	204607	C16H29O3N2	C12H18O4	12-Hydroxyjasmonic acid	226.12	-	-
						C16H29O3N2	C12H18O4	Epi-4'-Hydroxyjasmonic acid	226.12	-	-
						C16H29O3N2	C12H18O4	Tuberonic acid	226.12	-	-
75	8.57012	725.234	229.191	233.216	252909	C12H25O2N2	C8H14O3	2-Keto-n-Caprylic acid	158.094	-	-
						C12H25O2N2	C8H14O3	3-Keto-n-Caprylic acid	158.094	-	-
						C12H25O2N2	C8H14O3	4-Hydroxycyclohexylacetic acid	158.094	-	-
						C12H25O2N2	C8H14O3	4-Keto-n-Caprylic acid	158.094	-	-
						C12H25O2N2	C8H14O3	5-Keto-n-Caprylic acid	158.094	-	-
						C12H25O2N2	C8H14O3	6-Keto-n-Caprylic acid	158.094	-	-
						C12H25O2N2	C8H14O3	7-Keto-n-Caprylic acid	158.094	-	-
76	8.80782	732.086	299.233	303.258	1.84397e+06	C16H31O3N2	C12H20O4	(-)-11-Hydroxy-9,10-dihydrojasmonic acid	228.136	-	-
						C16H31O3N2	C12H20O4	(-)-12-Hydroxy-9,10-dihydrojasmonic acid	228.136	-	-
						C16H31O3N2	C12H20O4	5-Heptyltetrahydro-2-oxo-3-furancarboxylic acid	228.136	-	-
						C16H31O3N2	C12H20O4	9,12-Dioxo-dodecanoic acid	228.136	-	-
						C16H31O3N2	C12H20O4	Traumatic acid	228.136	C16308	6402-36-4
77	8.7864	733.418	249.196	253.222	556403	C15H25ON2	C11H14O2	4-t-Butylbenzoic acid	178.099	C14535	98-73-7
						C15H25ON2	C11H14O2	5-Phenylvaleric acid	178.099	-	-
78	9.02	738.19	301.249	305.274	146024	C16H33O3N2	C12H22O4	Dodecanedioic acid	230.152	C02678	693-23-2
79	9.11934	740.915	339.264	343.289	556608	C19H35O3N2	C15H24O4	Acoric acid	268.168	-	5956-06-9
80	9.15221	741.739	259.202	263.227	117749	C13H27O3N2	C9H16O4	3-Methylsuberic acid	188.105	-	34284-35-0
						C13H27O3N2	C9H16O4	Nonanedioic acid	188.105	C08261	123-99-9
						C13H27O3N2	C9H16O4	Nonate	188.105	-	-
						C13H27O3N2	C9H16O4	NONIC ACID	188.105	-	-
81	9.18999	743.061	287.233	291.258	210341	C15H31O3N2	C11H20O4	Undecanedioic acid	216.136	-	-
82	9.74359	759.115	227.212	231.237	342984	C13H27ON2	C9H16O2	2,6-Dimethyl-5-heptenoic acid	156.115	-	-
						C13H27ON2	C9H16O2	2-Amyl 3-butenoic acid	156.115	-	-
						C13H27ON2	C9H16O2	2E-Nonenoic acid	156.115	-	-
						C13H27ON2	C9H16O2	6-Methyl-5-octenoic acid	156.115	-	-
						C13H27ON2	C9H16O2	8-Nonylenic acid	156.115	-	-
						C13H27ON2	C9H16O2	3Z-Nonenoic acid	156.115	-	-
						C13H27ON2	C9H16O2	4E-Nonenoic acid	156.115	-	-
						C13H27ON2	C9H16O2	6E-Nonenoic acid	156.115	-	-
						C13H27ON2	C9H16O2	6Z-Nonenoic acid	156.115	-	-
						C13H27ON2	C9H16O2	C9:1n-3	156.115	-	-
						C13H27ON2	C9H16O2	C9:1n-5	156.115	-	-
						C13H27ON2	C9H16O2	C9:1n-6	156.115	-	-
						C13H27ON2	C9H16O2	C9:1n-7	156.115	-	-
						C13H27ON2	C9H16O2	α-Nonylenic acid	156.115	-	-
						C13H27ON2	C9H16O2	β-Nonylenic acid	156.115	-	-
83	9.95717	764.468	299.233	303.258	6.24899e+06	C16H31O3N2	C12H20O4	(-)-11-Hydroxy-9,10-dihydrojasmonic acid	228.136	-	-
						C16H31O3N2	C12H20O4	(-)-12-Hydroxy-9,10-dihydrojasmonic acid	228.136	-	-
						C16H31O3N2	C12H20O4	5-Heptyltetrahydro-2-oxo-3-furancarboxylic acid	228.136	-	-
						C16H31O3N2	C12H20O4	9,12-Dioxo-dodecanoic acid	228.136	-	-
						C16H31O3N2	C12H20O4	Traumatic acid	228.136	C16308	6402-36-4
84	9.98339	765.253	297.217	301.242	685440	C16H29O3N2	C12H18O4	12-Hydroxyjasmonic acid	226.12	-	-
						C16H29O3N2	C12H18O4	Epi-4'-Hydroxyjasmonic acid	226.12	-	-
						C16H29O3N2	C12H18O4	Tuberonic acid	226.12	-	-
85	10.1237	769.527	287.233	291.258	261652	C15H31O3N2	C11H20O4	Undecanedioic acid	216.136	-	-
86	10.1399	769.737	245.223	249.248	86747.6	C13H29O2N2	C9H18O3	3-Hydroxy pelargonic acid	174.126	-	88930-09-0
87	10.3235	775.218	317.222	321.247	63521.3	C19H29O2N2	C15H18O3	Loxoprofen	246.126	D08149	68767-14-6
						C19H29O2N2	C15H18O3	PPOH	246.126	-	206052-01-9
88	10.3466	775.712	259.202	263.227	967793	C13H27O3N2	C9H16O4	3-Methylsuberic acid	188.105	-	34284-35-0
						C13H27O3N2	C9H16O4	Nonanedioic acid	188.105	C08261	123-99-9
						C13H27O3N2	C9H16O4	Nonate	188.105	-	-
						C13H27O3N2	C9H16O4	NONIC ACID	188.105	-	-
89	10.3414	775.807	243.207	247.232	332633	C13H27O2N2	C9H16O3	7-Methyl-3-oxooctanoic acid	172.11	-	-
						C13H27O2N2	C9H16O3	7-Methyl-4-oxo-octanoic acid	172.11	-	-
						C13H27O2N2	C9H16O3	7-Methyl-6-oxo-octanoic acid	172.11	-	-
90	10.5016	778.435	299.233	303.258	6.41926e+06	C16H31O3N2	C12H20O4	(-)-11-Hydroxy-9,10-dihydrojasmonic acid	228.136	-	-
						C16H31O3N2	C12H20O4	(-)-12-Hydroxy-9,10-dihydrojasmonic acid	228.136	-	-
						C16H31O3N2	C12H20O4	5-Heptyltetrahydro-2-oxo-3-furancarboxylic acid	228.136	-	-
						C16H31O3N2	C12H20O4	9,12-Dioxo-dodecanoic acid	228.136	-	-
						C16H31O3N2	C12H20O4	Traumatic acid	228.136	C16308	6402-36-4
91	10.4755	779.324	293.186	297.211	80047.1	C16H25O3N2	C12H14O4	2E,4E,8E,10E-Dodecatetraenedioic acid	222.089	-	-
						C16H25O3N2	C12H14O4	Monoisobutyl phthalic acid	222.089	-	30833-53-5
						C16H25O3N2	C12H14O4	Valeroyl Salicylate	222.089	-	64206-54-8
92	10.6209	783.761	273.254	277.279	67918.3	C15H33O2N2	C11H22O3	10-Hydroxy-undecanoic acid	202.157	-	-
						C15H33O2N2	C11H22O3	2-Hydroxy hendecanoic acid	202.157	-	-
						C15H33O2N2	C11H22O3	3-Hydroxy-undecanoic acid	202.157	-	-
						C15H33O2N2	C11H22O3	4-Hydroxy-undecanoic acid	202.157	-	-
						C15H33O2N2	C11H22O3	Omega-Hydroxy hendecanoic acid	202.157	-	-
93	10.8661	790.544	235.181	239.206	772507	C14H23ON2	C10H12O2	Eugenol	164.084	C10453	97-53-0
						C14H23ON2	C10H12O2	3-Phenylbutyric acid	164.084	-	4593-90-2
						C14H23ON2	C10H12O2	4-Isopropylbenzoic acid	164.084	C06578	536-66-3
						C14H23ON2	C10H12O2	Benzenebutanoic acid	164.084	-	-
94	11.0554	796.009	277.228	281.253	608445	C17H29ON2	C13H18O2	(±)-Ibuprofen	206.131	C01588	15687-27-1
95	11.1194	797.638	335.233	339.258	302034	C19H31O3N2	C15H20O4	(±)Abscisic Acid	264.136	-	14375-45-2
						C19H31O3N2	C15H20O4	γ-CEHC	264.136	-	-
96	11.4539	809.243	337.249	341.273	279882	C19H33O3N2	C15H22O4	4'-Dihydroabscisic acid	266.152	-	84026-26-6
						C19H33O3N2	C15H22O4	Gemfibrozil M1	266.152	-	80373-12-2
						C19H33O3N2	C15H22O4	Gemfibrozil M4	266.152	-	80373-14-4
						C19H33O3N2	C15H22O4	Xanthoxic acid	266.152	C13454	-
97	11.7747	820.006	307.275	311.3	589294	C19H35ON2	C15H24O2	Dihydro-alpha-santalic acid	236.178	-	-
						C19H35ON2	C15H24O2	Farnesoic acid	236.178	C16502	462-11-3
98	11.9151	824.922	297.217	301.243	350264	C16H29O3N2	C12H18O4	12-Hydroxyjasmonic acid	226.12	-	-
						C16H29O3N2	C12H18O4	Epi-4'-Hydroxyjasmonic acid	226.12	-	-
						C16H29O3N2	C12H18O4	Tuberonic acid	226.12	-	-
99	12.0936	830.966	239.212	243.237	382426	C14H27ON2	C10H16O2	C10:2n-4,6	168.115	-	-
						C14H27ON2	C10H16O2	C10:2n-6,8	168.115	-	-
						C14H27ON2	C10H16O2	(-)-Cis-Chrysanthemic acid	168.115	-	-
						C14H27ON2	C10H16O2	(+)-Cis-Chrysanthemic acid	168.115	-	-
						C14H27ON2	C10H16O2	2,3-Decadienoic acid	168.115	-	-
						C14H27ON2	C10H16O2	3,4-Decadienoic acid	168.115	-	-
						C14H27ON2	C10H16O2	3,5-Decadienoic acid	168.115	-	-
						C14H27ON2	C10H16O2	3,7-Dimethyl-2Z,6E-octadienoic acid	168.115	-	-
						C14H27ON2	C10H16O2	4E,9-Decadienoic acid	168.115	-	-
						C14H27ON2	C10H16O2	5E,9-Decadienoic acid	168.115	-	-
						C14H27ON2	C10H16O2	7,9-Decadienoic acid	168.115	-	-
						C14H27ON2	C10H16O2	Aleprestic acid	168.115	-	-
						C14H27ON2	C10H16O2	C10:2n-1,3	168.115	-	-
						C14H27ON2	C10H16O2	C10:2n-1,5	168.115	-	-
						C14H27ON2	C10H16O2	C10:2n-1,6	168.115	-	-
						C14H27ON2	C10H16O2	C10:2n-2,4	168.115	-	-
						C14H27ON2	C10H16O2	C10:2n-2,5	168.115	-	-
						C14H27ON2	C10H16O2	C10:2n-2,6	168.115	-	-
						C14H27ON2	C10H16O2	C10:2n-2,7	168.115	-	-
						C14H27ON2	C10H16O2	C10:2n-4,8	168.115	-	-
						C14H27ON2	C10H16O2	C10:2n-5,8	168.115	-	-
						C14H27ON2	C10H16O2	C10:2n-6,7	168.115	-	-
						C14H27ON2	C10H16O2	C10:2n-7,8	168.115	-	-
						C14H27ON2	C10H16O2	Chrysanthemic acid	168.115	C09842	-
						C14H27ON2	C10H16O2	Cis, cis-stillingic acid	168.115	-	-
						C14H27ON2	C10H16O2	Cis-2-Methyl-5-isopropylhexa-2,5-dienoic acid	168.115	C11944	65860-56-2
						C14H27ON2	C10H16O2	Trans-2-Methyl-5-isopropylhexa-2,5-dienoic acid	168.115	C11943	65860-54-0
						C14H27ON2	C10H16O2	3,7-Dimethyl-2E,6-octadienoic acid	168.115	C16461	459-80-3
100	12.1358	832.44	281.222	285.247	8.1575e+06	C16H29O2N2	C12H18O3	(±)7-Epi Jasmonic Acid	210.126	C16317	62653-85-4
						C16H29O2N2	C12H18O3	(±)-Jasmonic Acid	210.126	-	77026-92-7
						C16H29O2N2	C12H18O3	(3S,7R)-Iso-jasmonic acid	210.126	-	-
						C16H29O2N2	C12H18O3	(3S,7S)-Jasmonic acid	210.126	-	-
						C16H29O2N2	C12H18O3	Sedanonic acid	210.126	-	-
101	12.1828	834.193	287.269	291.294	98217	C16H35O2N2	C12H24O3	3-Hydroxydodecanoic acid	216.173	-	1883-13-2
						C16H35O2N2	C12H24O3	11-Hydroxy-dodecanoic acid	216.173	-	-
						C16H35O2N2	C12H24O3	11R-Hydroxy-dodecanoic acid	216.173	-	-
						C16H35O2N2	C12H24O3	12-Hydroxydodecanoic acid	216.173	C08317	505-95-3
						C16H35O2N2	C12H24O3	2-Hydroxylauric acid	216.173	-	-
						C16H35O2N2	C12H24O3	4-Hydroxy lauric acid	216.173	-	-
						C16H35O2N2	C12H24O3	7-Hydroxy-dodecanoic acid	216.173	-	-
						C16H35O2N2	C12H24O3	9-Hydroxy-dodecanoic acid	216.173	-	-
						C16H35O2N2	C12H24O3	Beta-Hydroxylauric acid	216.173	-	-
						C16H35O2N2	C12H24O3	Dodecanoic acid, 11-hydroxy-, (R)-	216.173	-	-
						C16H35O2N2	C12H24O3	Xi-5-Hydroxydodecanoic acid	216.173	-	7779-95-5
						C16H35O2N2	C12H24O3	α-Hydroxy lauric acid	216.173	-	-
102	12.234	835.804	313.249	317.274	256484	C17H33O3N2	C13H22O4	2-Carboxy-4-dodecanolide	242.152	-	-
103	12.3264	839.05	249.196	253.221	1.2124e+06	C15H25ON2	C11H14O2	4-t-Butylbenzoic acid	178.099	C14535	98-73-7
						C15H25ON2	C11H14O2	5-Phenylvaleric acid	178.099	-	-
104	12.3603	840.496	319.238	323.263	121128	C19H31O2N2	C15H20O3	2-(4-(((1R,2R)-2-Hydroxycyclopentyl)methyl)phenyl)propanoic acid	248.141	-	-
						C19H31O2N2	C15H20O3	2-(4-(((1R,2S)-2-Hydroxycyclopentyl)methyl)phenyl)propanoic acid	248.141	-	-
						C19H31O2N2	C15H20O3	2,4-Pentadienoic acid, 3-methyl-5-(2,6,6-trimethyl-3-oxo-1-cyclohexen-1-yl)-	248.141	-	126624-24-6
						C19H31O2N2	C15H20O3	Gamma-CEHC	248.141	-	178167-77-6
105	12.4016	841.362	225.196	229.222	156026	C13H25ON2	C9H14O2	(E)-2,6-Dimethyl-2,5-heptadienoic acid	154.099	-	261949-42-2
						C13H25ON2	C9H14O2	2,6-Nonadienoic acid	154.099	-	-
						C13H25ON2	C9H14O2	2-Nonynoic acid	154.099	-	-
						C13H25ON2	C9H14O2	4-Nonynoic acid	154.099	-	-
						C13H25ON2	C9H14O2	5-Nonynoic acid	154.099	-	-
						C13H25ON2	C9H14O2	6-Nonynoic acid	154.099	-	-
						C13H25ON2	C9H14O2	7-Nonynoic acid	154.099	-	-
						C13H25ON2	C9H14O2	8-Nonynoic acid	154.099	-	-
						C13H25ON2	C9H14O2	C9:2n-2,4	154.099	-	-
						C13H25ON2	C9H14O2	C9:2n-5,7	154.099	-	-
						C13H25ON2	C9H14O2	2E,6Z-Nonadienoic acid	154.099	-	-
						C13H25ON2	C9H14O2	2Z,4E-Nonadienoic acid	154.099	-	-
						C13H25ON2	C9H14O2	5,7-Nonadienoic acid	154.099	-	-
106	12.4424	842.821	293.186	297.211	78638.6	C16H25O3N2	C12H14O4	2E,4E,8E,10E-Dodecatetraenedioic acid	222.089	-	-
						C16H25O3N2	C12H14O4	Monoisobutyl phthalic acid	222.089	-	30833-53-5
						C16H25O3N2	C12H14O4	Valeroyl Salicylate	222.089	-	64206-54-8
107	12.4564	843.397	317.222	321.246	144944	C19H29O2N2	C15H18O3	Loxoprofen	246.126	D08149	68767-14-6
						C19H29O2N2	C15H18O3	PPOH	246.126	-	206052-01-9
108	12.5249	846.029	405.311	409.336	65029	C24H41O3N2	C20H30O4	11,18-Di-HEPE	334.214	-	-
						C24H41O3N2	C20H30O4	PGA2	334.214	C05953	13345-50-1
						C24H41O3N2	C20H30O4	(Ent-16betaOH)-16,17-Dihydroxy-9(11)-kauren-19-oic acid	334.214	-	-
						C24H41O3N2	C20H30O4	12,18-Di-HEPE	334.214	-	-
						C24H41O3N2	C20H30O4	12-Oxo-LTB4	334.214	C05949	136696-10-1
						C24H41O3N2	C20H30O4	13,14-Dihydro-15-keto Prostaglandin J2	334.214	-	-
						C24H41O3N2	C20H30O4	13,14-Dihydro-15-keto-PGA2	334.214	-	74872-89-2
						C24H41O3N2	C20H30O4	14,15-Dehydro-LTB4	334.214	-	114616-11-4
						C24H41O3N2	C20H30O4	15-Deoxy-δ-12,14-PGD2	334.214	-	85235-11-6
						C24H41O3N2	C20H30O4	15R-PGA2	334.214	-	-
						C24H41O3N2	C20H30O4	18-Resolvin E3	334.214	-	-
						C24H41O3N2	C20H30O4	18S-Resolvin E2	334.214	-	-
						C24H41O3N2	C20H30O4	5(S)-HpEPE	334.214	-	-
						C24H41O3N2	C20H30O4	5,12-Dihydroxy-6,8,10,14,17-eicosapentaenoic acid	334.214	-	-
						C24H41O3N2	C20H30O4	5,6-Ep-15S-HETE	334.214	C14815	-
						C24H41O3N2	C20H30O4	5-Trans-PGA2	334.214	-	-
						C24H41O3N2	C20H30O4	8,18-Di-HEPE	334.214	-	-
						C24H41O3N2	C20H30O4	8Alpha-8-Hydroxy-12-oxo-13-abieten-18-oic acid	334.214	-	130252-62-9
						C24H41O3N2	C20H30O4	8-Iso Prostaglandin A2	334.214	-	-
						C24H41O3N2	C20H30O4	Bicyclo-PGE2	334.214	-	74158-09-1
						C24H41O3N2	C20H30O4	Delta-12-PGJ2	334.214	C05958	87893-54-7
						C24H41O3N2	C20H30O4	LTB5	334.214	-	-
						C24H41O3N2	C20H30O4	PGB2	334.214	C05954	13367-85-6
						C24H41O3N2	C20H30O4	PGC2	334.214	C05955	49825-91-4
						C24H41O3N2	C20H30O4	PGJ2	334.214	C05957	060203-57-8
						C24H41O3N2	C20H30O4	Resolvin E2	334.214	C18173	-
109	12.6311	849.595	287.27	291.295	133292	C16H35O2N2	C12H24O3	3-Hydroxydodecanoic acid	216.173	-	1883-13-2
						C16H35O2N2	C12H24O3	11-Hydroxy-dodecanoic acid	216.173	-	-
						C16H35O2N2	C12H24O3	11R-Hydroxy-dodecanoic acid	216.173	-	-
						C16H35O2N2	C12H24O3	12-Hydroxydodecanoic acid	216.173	C08317	505-95-3
						C16H35O2N2	C12H24O3	2-Hydroxylauric acid	216.173	-	-
						C16H35O2N2	C12H24O3	4-Hydroxy lauric acid	216.173	-	-
						C16H35O2N2	C12H24O3	7-Hydroxy-dodecanoic acid	216.173	-	-
						C16H35O2N2	C12H24O3	9-Hydroxy-dodecanoic acid	216.173	-	-
						C16H35O2N2	C12H24O3	Beta-Hydroxylauric acid	216.173	-	-
						C16H35O2N2	C12H24O3	Dodecanoic acid, 11-hydroxy-, (R)-	216.173	-	-
						C16H35O2N2	C12H24O3	Xi-5-Hydroxydodecanoic acid	216.173	-	7779-95-5
						C16H35O2N2	C12H24O3	α-Hydroxy lauric acid	216.173	-	-
110	12.7094	852.359	321.254	325.279	113333	C19H33O2N2	C15H22O3	Valerenolic acid	250.157	-	1619-16-5
						C19H33O2N2	C15H22O3	Gemfibrozil	250.157	C07020	25812-30-0
111	12.7416	853.427	301.249	305.274	286604	C16H33O3N2	C12H22O4	Dodecanedioic acid	230.152	C02678	693-23-2
112	12.9563	860.676	281.222	285.247	577008	C16H29O2N2	C12H18O3	(±)7-Epi Jasmonic Acid	210.126	C16317	62653-85-4
						C16H29O2N2	C12H18O3	(±)-Jasmonic Acid	210.126	-	77026-92-7
						C16H29O2N2	C12H18O3	(3S,7R)-Iso-jasmonic acid	210.126	-	-
						C16H29O2N2	C12H18O3	(3S,7S)-Jasmonic acid	210.126	-	-
						C16H29O2N2	C12H18O3	Sedanonic acid	210.126	-	-
113	12.9589	860.907	325.249	329.274	369556	C18H33O3N2	C14H22O4	C75	254.152	-	191282-48-1
114	13.0533	864.374	243.243	247.268	5.2451e+06	C14H31ON2	C10H20O2	Capric acid	172.146	C01571	334-48-5
115	13.0892	865.386	337.249	341.273	2.2824e+06	C19H33O3N2	C15H22O4	4'-Dihydroabscisic acid	266.152	-	84026-26-6
						C19H33O3N2	C15H22O4	Gemfibrozil M1	266.152	-	80373-12-2
						C19H33O3N2	C15H22O4	Gemfibrozil M4	266.152	-	80373-14-4
						C19H33O3N2	C15H22O4	Xanthoxic acid	266.152	C13454	-
116	13.2377	870.572	273.217	277.242	160602	C14H29O3N2	C10H18O4	2,6-Dimethyl-1,8-octanedioic acid	202.12	-	-
						C14H29O3N2	C10H18O4	2-Ethylsuberic acid	202.12	-	3971-33-3
						C14H29O3N2	C10H18O4	R-2-Hydroxy-3-methylbutanoic acid 3-Methylbutanoyl	202.12	-	-
						C14H29O3N2	C10H18O4	Sebacic acid	202.12	C08277	111-20-6
117	13.2907	872.49	401.337	405.363	258158	C22H45O4N2	C18H34O5	9,10,13-TriHOME	330.241	C14835	29907-57-1
118	13.3708	876.074	285.254	289.279	67085.2	C16H33O2N2	C12H22O3	10-Hydroxy-11-Dodecenoic acid	214.157	-	-
						C16H33O2N2	C12H22O3	11-Oxo-dodecanoic acid	214.157	-	-
						C16H33O2N2	C12H22O3	12-Hydroxy-10-Dodecenoic acid	214.157	-	-
						C16H33O2N2	C12H22O3	12-Hydroxy-3Z-Dodecenoic acid	214.157	-	-
						C16H33O2N2	C12H22O3	12-Oxo-dodecanoic acid	214.157	-	-
						C16H33O2N2	C12H22O3	2-Oxo-dodecanoic acid	214.157	-	-
						C16H33O2N2	C12H22O3	3-Oxo-dodecanoic acid	214.157	-	-
						C16H33O2N2	C12H22O3	3R-Hydroxy-5Z-dodecenoic acid	214.157	-	-
						C16H33O2N2	C12H22O3	4-Keto Lauric acid	214.157	-	-
						C16H33O2N2	C12H22O3	5-Dodecenoic acid, 3-hydroxy-, [R-(Z)]-	214.157	-	-
						C16H33O2N2	C12H22O3	5-Oxododecanoic acid	214.157	-	-
						C16H33O2N2	C12H22O3	7-Oxododecanoic acid	214.157	-	-
						C16H33O2N2	C12H22O3	9-Keto Lauric acid	214.157	-	-
						C16H33O2N2	C12H22O3	4-Keto lauric acid	214.157	-	-
						C16H33O2N2	C12H22O3	10-Hydroxy-11-dodecenoic acid	241.157	-	-
						C16H33O2N2	C12H22O3	12-Hydroxy-10-dodecenoic acid	241.157	-	-
						C16H33O2N2	C12H22O3	12-Hydroxy-3Z-dodecenoic acid	241.157	-	-
						C16H33O2N2	C12H22O3	3R-Hydroxy-5Z-dodecenoic acid	241.157	-	-
						C16H33O2N2	C12H22O3	5-Dodecenoic acid, 3-hydroxy-, [R-(Z)]-	241.157	-	-
119	13.4293	877.623	227.212	231.237	169227	C13H27ON2	C9H16O2	2,6-Dimethyl-5-heptenoic acid	156.115	-	-
						C13H27ON2	C9H16O2	2-Amyl 3-butenoic acid	156.115	-	-
						C13H27ON2	C9H16O2	2E-Nonenoic acid	156.115	-	-
						C13H27ON2	C9H16O2	6-Methyl-5-octenoic acid	156.115	-	-
						C13H27ON2	C9H16O2	8-Nonylenic acid	156.115	-	-
						C13H27ON2	C9H16O2	3Z-Nonenoic acid	156.115	-	-
						C13H27ON2	C9H16O2	4E-Nonenoic acid	156.115	-	-
						C13H27ON2	C9H16O2	6E-Nonenoic acid	156.115	-	-
						C13H27ON2	C9H16O2	6Z-Nonenoic acid	156.115	-	-
						C13H27ON2	C9H16O2	8-Nonylenic acid	156.115	-	-
						C13H27ON2	C9H16O2	C9:1n-3	156.115	-	-
						C13H27ON2	C9H16O2	C9:1n-5	156.115	-	-
						C13H27ON2	C9H16O2	C9:1n-6	156.115	-	-
						C13H27ON2	C9H16O2	C9:1n-7	156.115	-	-
						C13H27ON2	C9H16O2	α-Nonylenic acid	156.115	-	-
						C13H27ON2	C9H16O2	β-Nonylenic acid	156.115	-	-
120	13.5376	880.248	401.337	405.363	376572	C22H45O4N2	C18H34O5	9,10,13-TriHOME	330.241	C14835	29907-57-1
121	13.6255	884.312	337.249	341.273	4.37595e+06	C19H33O3N2	C15H22O4	4'-Dihydroabscisic acid	266.152	-	84026-26-6
						C19H33O3N2	C15H22O4	Gemfibrozil M1	266.152	-	80373-12-2
						C19H33O3N2	C15H22O4	Gemfibrozil M4	266.152	-	80373-14-4
						C19H33O3N2	C15H22O4	Xanthoxic acid	266.152	C13454	-
122	13.6639	886.09	243.207	247.232	79760.1	C13H27O2N2	C9H16O3	7-Methyl-3-oxooctanoic acid	172.11	-	-
						C13H27O2N2	C9H16O3	7-Methyl-4-oxo-octanoic acid	172.11	-	-
						C13H27O2N2	C9H16O3	7-Methyl-6-oxo-octanoic acid	172.11	-	-
123	13.716	887.242	313.249	317.274	127402	C17H33O3N2	C13H22O4	2-Carboxy-4-dodecanolide	242.152	-	-
124	13.8083	890.116	343.201	347.227	795486	C20H27O3N2	C16H16O4	5C-Aglycone	272.105	-	-
125	13.8917	893.502	325.249	329.274	130709	C18H33O3N2	C14H22O4	C75	254.152	-	191282-48-1
126	13.8986	893.696	243.243	247.268	2.80145e+06	C14H31ON2	C10H20O2	Capric acid	172.146	C01571	334-48-5
127	13.9757	896.22	357.218	361.243	79629.9	C21H29O3N2	C17H18O4	Bifemelane (M4)	286.12	-	101948-33-8
						C21H29O3N2	C17H18O4	Bifemelane (M5)	286.12	-	101948-34-9
						C21H29O3N2	C17H18O4	Diphenolic acid	286.12	C14294	126-00-1
128	14.1368	903.274	479.385	483.41	399125	C28H51O4N2	C24H40O5	Allocholic acid	408.288	-	2464-18-8
						C28H51O4N2	C24H40O5	1,3,12-Trihydroxycholan-24-oic acid	408.288	-	63266-91-1
						C28H51O4N2	C24H40O5	1b,3a,12a-Trihydroxy-5b-cholanoic acid	408.288	-	80434-32-8
						C28H51O4N2	C24H40O5	1b,3a,7a-Trihydroxy-5b-cholanoic acid	408.288	-	99598-04-6
						C28H51O4N2	C24H40O5	2b,3a,7a-Trihydroxy-5b-cholanoic acid	408.288	-	133565-87-4
						C28H51O4N2	C24H40O5	3a,4b,12a-Trihydroxy-5b-cholanoic acid	408.288	-	129012-50-6
						C28H51O4N2	C24H40O5	3a,4b,7a-Trihydroxy-5b-cholanoic acid	408.288	-	117590-81-5
						C28H51O4N2	C24H40O5	3a,6a,7b-Trihydroxy-5b-cholanoic acid	408.288	-	6830-03-41
						C28H51O4N2	C24H40O5	3a,6b,7b-Trihydroxy-5b-cholanoic acid	408.288	-	2393-59-1
						C28H51O4N2	C24H40O5	3a,7a,12b-Trihydroxy-5b-cholanoic acid	408.288	-	71883-64-2
						C28H51O4N2	C24H40O5	3a,7b,12a-Trihydroxy-5a-Cholanoic acid	408.288	-	63324-19-6
						C28H51O4N2	C24H40O5	3a,7b,12b-Trihydroxy-5b-cholanoic acid	408.288	-	81938-67-2
						C28H51O4N2	C24H40O5	3b,7a,12a-Trihydroxy-5a-Cholanoic acid	408.288	-	15073-87-7
						C28H51O4N2	C24H40O5	3b,7a,12a-Trihydroxy-5b-cholanoic acid	408.288	-	3338-16-7
						C28H51O4N2	C24H40O5	3b,7b,12a-Trihydroxy-5a-Cholanoic acid	408.288	-	63324-20-9
						C28H51O4N2	C24H40O5	3b,7b,12a-Trihydroxy-5b-cholanoic acid	408.288	-	10322-18-6
						C28H51O4N2	C24H40O5	6a,12a-Dihydroxylithocholic acid	408.288	-	21066-18-2
						C28H51O4N2	C24H40O5	Alpha-Muricholic acid	408.288	-	2393-58-0
						C28H51O4N2	C24H40O5	Hyocholic acid	408.288	-	547-75-1
						C28H51O4N2	C24H40O5	Muricholic acid	408.288	-	39016-49-4
						C28H51O4N2	C24H40O5	Cholic acid	408.288	C00695	81-25-4
						C28H51O4N2	C24H40O5	Ursocholic acid	408.288	-	2955-27-3
						C28H51O4N2	C24H40O5	Alpha-Muricholic acid	408.288	-	2393-58-0
						C28H51O4N2	C24H40O5	Hyocholic acid	408.288	-	547-75-1
						C28H51O4N2	C24H40O5	Muricholic acid	408.288	-	39016-49-4
129	14.218	905.337	283.238	287.263	3.59173e+06	C16H31O2N2	C12H20O3	Cucurbic acid	212.141	-	-
130	14.3236	909.706	277.227	281.253	524487	C17H29ON2	C13H18O2	(±)-Ibuprofen	206.131	C01588	15687-27-1
131	14.332	910.073	285.254	289.279	62470.5	C16H33O2N2	C12H22O3	10-Hydroxy-11-Dodecenoic acid	214.157	-	-
						C16H33O2N2	C12H22O3	11-Oxo-dodecanoic acid	214.157	-	-
						C16H33O2N2	C12H22O3	12-Hydroxy-10-Dodecenoic acid	214.157	-	-
						C16H33O2N2	C12H22O3	12-Hydroxy-3Z-Dodecenoic acid	214.157	-	-
						C16H33O2N2	C12H22O3	12-Oxo-dodecanoic acid	214.157	-	-
						C16H33O2N2	C12H22O3	2-Oxo-dodecanoic acid	214.157	-	-
						C16H33O2N2	C12H22O3	3-Oxo-dodecanoic acid	214.157	-	-
						C16H33O2N2	C12H22O3	3R-Hydroxy-5Z-dodecenoic acid	214.157	-	-
						C16H33O2N2	C12H22O3	5-Dodecenoic acid, 3-hydroxy-, [R-(Z)]-	214.157	-	-
						C16H33O2N2	C12H22O3	5-Oxododecanoic acid	214.157	-	-
						C16H33O2N2	C12H22O3	7-Oxododecanoic acid	214.157	-	-
						C16H33O2N2	C12H22O3	9-Keto Lauric acid	214.157	-	-
						C16H33O2N2	C12H22O3	4-Keto lauric acid	214.157	-	-
132	14.3689	911.621	271.274	275.3	76447	C16H35ON2	C12H24O2	Lauric acid	200.178	C02679	143-07-7
133	14.502	916.675	301.285	305.31	59806.2	C17H37O2N2	C13H26O3	(R)-3-Hydroxytridecanoic acid	230.188	-	-
						C17H37O2N2	C13H26O3	12-Methoxydodecanoic acid	230.188	-	92169-28-3
						C17H37O2N2	C13H26O3	13-Hydroxy-tridecanoic acid	230.188	-	-
						C17H37O2N2	C13H26O3	2-Hydroxy-tridecanoic acid	230.188	-	-
						C17H37O2N2	C13H26O3	3-Hydroxy-tridecanoic acid	230.188	-	-
						C17H37O2N2	C13H26O3	3R-Hydroxy-tridecanoic acid	230.188	-	-
						C17H37O2N2	C13H26O3	4-Hydroxy-tridecanoic acid	230.188	-	-
						C17H37O2N2	C13H26O3	4-Oxatetradecanoic acid	230.188	-	7420-16-8
134	14.6121	920.983	241.228	245.253	196704	C14H29ON2	C10H18O2	Citronellic acid	170.031	C16462	502-47-6
						C14H29ON2	C10H18O2	2,7-Dimethyl-6-octenoic acid	170.031	-	-
						C14H29ON2	C10H18O2	2-Decylenic acid	170.031	-	-
						C14H29ON2	C10H18O2	3,7-Dimethyl-2-octenoic acid	170.031	-	-
						C14H29ON2	C10H18O2	3-Decylenic acid	170.031	-	-
						C14H29ON2	C10H18O2	3-Methyl-2-nonenoic acid	170.031	-	-
						C14H29ON2	C10H18O2	3Z-Decenoic acid	170.031	-	-
						C14H29ON2	C10H18O2	4Z-Decenoic acid	170.031	-	-
						C14H29ON2	C10H18O2	8-Methyl-6-nonenoic acid	170.031	C18202	-
						C14H29ON2	C10H18O2	8-Methylnonenoate	170.031	-	59320-77-3
						C14H29ON2	C10H18O2	9-Decenoic acid	170.031	-	14436-32-9
						C14H29ON2	C10H18O2	C10:1n-6	170.031	-	-
						C14H29ON2	C10H18O2	C10:1n-7	170.031	-	-
						C14H29ON2	C10H18O2	Caproleic acid	170.031	-	-
						C14H29ON2	C10H18O2	Cis-dec-2-enoic acid	170.031	-	-
						C14H29ON2	C10H18O2	Isodecenoic acid	170.031	-	-
						C14H29ON2	C10H18O2	Obtusilic acid	170.031	-	-
135	14.6597	922.95	281.222	285.248	287495	C16H29O2N2	C12H18O3	(±)7-Epi Jasmonic Acid	210.126	C16317	62653-85-4
						C16H29O2N2	C12H18O3	(±)-Jasmonic Acid	210.126	-	77026-92-7
						C16H29O2N2	C12H18O3	(3S,7R)-Iso-jasmonic acid	210.126	-	-
						C16H29O2N2	C12H18O3	(3S,7S)-Jasmonic acid	210.126	-	-
						C16H29O2N2	C12H18O3	Sedanonic acid	210.126	-	-
136	14.6929	924.368	277.227	281.253	243073	C17H29ON2	C13H18O2	(±)-Ibuprofen	206.131	C01588	15687-27-1
137	14.7224	925.388	395.327	399.351	775552	C23H43O3N2	C19H32O4	TOFA	324.23	-	54857-86-2
138	14.7309	925.833	239.212	243.237	413545	C14H27ON2	C10H16O2	C10:2n-4,6	168.115	-	-
						C14H27ON2	C10H16O2	C10:2n-6,8	168.115	-	-
						C14H27ON2	C10H16O2	(-)-Cis-Chrysanthemic acid	168.115	-	-
						C14H27ON2	C10H16O2	(+)-Cis-Chrysanthemic acid	168.115	-	-
						C14H27ON2	C10H16O2	2,3-Decadienoic acid	168.115	-	-
						C14H27ON2	C10H16O2	3,4-Decadienoic acid	168.115	-	-
						C14H27ON2	C10H16O2	3,5-Decadienoic acid	168.115	-	-
						C14H27ON2	C10H16O2	3,7-Dimethyl-2Z,6E-octadienoic acid	168.115	-	-
						C14H27ON2	C10H16O2	4E,9-Decadienoic acid	168.115	-	-
						C14H27ON2	C10H16O2	5E,9-Decadienoic acid	168.115	-	-
						C14H27ON2	C10H16O2	7,9-Decadienoic acid	168.115	-	-
						C14H27ON2	C10H16O2	Aleprestic acid	168.115	-	-
						C14H27ON2	C10H16O2	C10:2n-1,3	168.115	-	-
						C14H27ON2	C10H16O2	C10:2n-1,5	168.115	-	-
						C14H27ON2	C10H16O2	C10:2n-1,6	168.115	-	-
						C14H27ON2	C10H16O2	C10:2n-2,4	168.115	-	-
						C14H27ON2	C10H16O2	C10:2n-2,5	168.115	-	-
						C14H27ON2	C10H16O2	C10:2n-2,6	168.115	-	-
						C14H27ON2	C10H16O2	C10:2n-2,7	168.115	-	-
						C14H27ON2	C10H16O2	C10:2n-4,8	168.115	-	-
						C14H27ON2	C10H16O2	C10:2n-5,8	168.115	-	-
						C14H27ON2	C10H16O2	C10:2n-6,7	168.115	-	-
						C14H27ON2	C10H16O2	C10:2n-7,8	168.115	-	-
						C14H27ON2	C10H16O2	Chrysanthemic acid	168.115	C09842	-
						C14H27ON2	C10H16O2	Cis, cis-stillingic acid	168.115	-	-
						C14H27ON2	C10H16O2	Cis-2-Methyl-5-isopropylhexa-2,5-dienoic acid	168.115	C11944	65860-56-2
						C14H27ON2	C10H16O2	Trans-2-Methyl-5-isopropylhexa-2,5-dienoic acid	168.115	C11943	65860-54-0
						C14H27ON2	C10H16O2	3,7-Dimethyl-2E,6-octadienoic acid	168.115	C16461	459-80-3
139	14.76	925.98	323.269	327.295	143323	C19H35O2N2	C15H24O3	Juvenile hormone III acid	252.173	C16504	-
140	14.9422	934.36	287.269	291.294	68552	C16H35O2N2	C12H24O3	3-Hydroxydodecanoic acid	216.173	-	1883-13-2
						C16H35O2N2	C12H24O3	11-Hydroxy-dodecanoic acid	216.173	-	-
						C16H35O2N2	C12H24O3	11R-Hydroxy-dodecanoic acid	216.173	-	-
						C16H35O2N2	C12H24O3	12-Hydroxydodecanoic acid	216.173	C08317	505-95-3
						C16H35O2N2	C12H24O3	2-Hydroxylauric acid	216.173	-	-
						C16H35O2N2	C12H24O3	4-Hydroxy lauric acid	216.173	-	-
						C16H35O2N2	C12H24O3	7-Hydroxy-dodecanoic acid	216.173	-	-
						C16H35O2N2	C12H24O3	9-Hydroxy-dodecanoic acid	216.173	-	-
						C16H35O2N2	C12H24O3	Beta-Hydroxylauric acid	216.173	-	-
						C16H35O2N2	C12H24O3	Dodecanoic acid, 11-hydroxy-, (R)-	216.173	-	-
						C16H35O2N2	C12H24O3	Xi-5-Hydroxydodecanoic acid	216.173	-	7779-95-5
						C16H35O2N2	C12H24O3	α-Hydroxy lauric acid	216.173	-	-
141	14.9576	934.628	313.248	317.274	149019	C17H33O3N2	C13H22O4	2-Carboxy-4-dodecanolide	242.152	-	-
142	15.1021	939.978	353.243	357.268	214687	C19H33O4N2	C15H22O5	Dihydrophaseic acid		C15971	-
						C19H33O4N2	C15H22O5	Epidihydrophaseic acid		-	60102-38-7
						C19H33O4N2	C15H22O5	Pisumic acid		-	-
						C19H33O4N2	C15H22O5	Dihydrophaseic acid	282.147	C15971	-
						C19H33O4N2	C15H22O5	Epidihydrophaseic acid	282.147	-	60102-38-7
						C19H33O4N2	C15H22O5	Pisumic acid	282.147	-	-
143	15.1665	943.299	239.212	243.237	654576	C14H27ON2	C10H16O2	C10:2n-4,6	168.115	-	-
						C14H27ON2	C10H16O2	C10:2n-6,8	168.115	-	-
						C14H27ON2	C10H16O2	(-)-Cis-Chrysanthemic acid	168.115	-	-
						C14H27ON2	C10H16O2	(+)-Cis-Chrysanthemic acid	168.115	-	-
						C14H27ON2	C10H16O2	2,3-Decadienoic acid	168.115	-	-
						C14H27ON2	C10H16O2	3,4-Decadienoic acid	168.115	-	-
						C14H27ON2	C10H16O2	3,5-Decadienoic acid	168.115	-	-
						C14H27ON2	C10H16O2	3,7-Dimethyl-2Z,6E-octadienoic acid	168.115	-	-
						C14H27ON2	C10H16O2	4E,9-Decadienoic acid	168.115	-	-
						C14H27ON2	C10H16O2	5E,9-Decadienoic acid	168.115	-	-
						C14H27ON2	C10H16O2	7,9-Decadienoic acid	168.115	-	-
						C14H27ON2	C10H16O2	Aleprestic acid	168.115	-	-
						C14H27ON2	C10H16O2	C10:2n-1,3	168.115	-	-
						C14H27ON2	C10H16O2	C10:2n-1,5	168.115	-	-
						C14H27ON2	C10H16O2	C10:2n-1,6	168.115	-	-
						C14H27ON2	C10H16O2	C10:2n-2,4	168.115	-	-
						C14H27ON2	C10H16O2	C10:2n-2,5	168.115	-	-
						C14H27ON2	C10H16O2	C10:2n-2,6	168.115	-	-
						C14H27ON2	C10H16O2	C10:2n-2,7	168.115	-	-
						C14H27ON2	C10H16O2	C10:2n-4,8	168.115	-	-
						C14H27ON2	C10H16O2	C10:2n-5,8	168.115	-	-
						C14H27ON2	C10H16O2	C10:2n-6,7	168.115	-	-
						C14H27ON2	C10H16O2	C10:2n-7,8	168.115	-	-
						C14H27ON2	C10H16O2	Chrysanthemic acid	168.115	C09842	-
						C14H27ON2	C10H16O2	Cis, cis-stillingic acid	168.115	-	-
						C14H27ON2	C10H16O2	Cis-2-Methyl-5-isopropylhexa-2,5-dienoic acid	168.115	C11944	65860-56-2
						C14H27ON2	C10H16O2	Trans-2-Methyl-5-isopropylhexa-2,5-dienoic acid	168.115	C11943	65860-54-0
						C14H27ON2	C10H16O2	3,7-Dimethyl-2E,6-octadienoic acid	168.115	C16461	459-80-3
144	15.2977	948.534	301.227	305.253	154051	C19H29ON2	C15H18O2	15-Octadecene-9,11,13-triynoic acid	230.131	-	-
145	15.3063	949.001	339.264	343.289	1.43833e+06	C19H35O3N2	C15H24O4	Acoric acid	268.168	-	5956-06-9
146	15.3426	950.145	337.249	341.274	602721	C19H33O3N2	C15H22O4	4'-Dihydroabscisic acid	266.152	-	84026-26-6
						C19H33O3N2	C15H22O4	Gemfibrozil M1	266.152	-	80373-12-2
						C19H33O3N2	C15H22O4	Gemfibrozil M4	266.152	-	80373-14-4
						C19H33O3N2	C15H22O4	Xanthoxic acid	266.152	C13454	-
147	15.4217	952.682	313.249	317.274	141146	C17H33O3N2	C13H22O4	2-Carboxy-4-dodecanolide	242.152	-	-
148	15.5009	956.54	285.254	289.279	137344	C16H33O2N2	C12H22O3	10-Hydroxy-11-Dodecenoic acid	214.157	-	-
						C16H33O2N2	C12H22O3	11-Oxo-dodecanoic acid	214.157	-	-
						C16H33O2N2	C12H22O3	12-Hydroxy-10-Dodecenoic acid	214.157	-	-
						C16H33O2N2	C12H22O3	12-Hydroxy-3Z-Dodecenoic acid	214.157	-	-
						C16H33O2N2	C12H22O3	12-Oxo-dodecanoic acid	214.157	-	-
						C16H33O2N2	C12H22O3	2-Oxo-dodecanoic acid	214.157	-	-
						C16H33O2N2	C12H22O3	3-Oxo-dodecanoic acid	214.157	-	-
						C16H33O2N2	C12H22O3	3R-Hydroxy-5Z-dodecenoic acid	214.157	-	-
						C16H33O2N2	C12H22O3	5-Dodecenoic acid, 3-hydroxy-, [R-(Z)]-	214.157	-	-
						C16H33O2N2	C12H22O3	5-Oxododecanoic acid	214.157	-	-
						C16H33O2N2	C12H22O3	7-Oxododecanoic acid	214.157	-	-
						C16H33O2N2	C12H22O3	9-Keto Lauric acid	214.157	-	-
						C16H33O2N2	C12H22O3	4-Keto lauric acid	214.157	-	-
149	15.5095	956.899	273.254	277.279	56443	C15H33O2N2	C11H22O3	10-Hydroxy-undecanoic acid	202.157	-	-
						C15H33O2N2	C11H22O3	2-Hydroxy hendecanoic acid	202.157	-	-
						C15H33O2N2	C11H22O3	3-Hydroxy-undecanoic acid	202.157	-	-
						C15H33O2N2	C11H22O3	4-Hydroxy-undecanoic acid	202.157	-	-
						C15H33O2N2	C11H22O3	Omega-Hydroxy hendecanoic acid	202.157	-	-
150	15.5237	957.21	461.374	465.399	49786.4	C28H49O3N2	C24H38O4	12-Ketodeoxycholic acid	390.277	-	5130-29-0
						C28H49O3N2	C24H38O4	7a-Hydroxy-3-oxo-5b-cholanoic acid	390.277	-	4185-00-6
						C28H49O3N2	C24H38O4	7-Hydroxy-3-oxocholanoic acid	390.277	-	77059-13-3
						C28H49O3N2	C24H38O4	9'-Carboxy-alpha-chromanol	390.277	-	-
						C28H49O3N2	C24H38O4	D8'-Merulinic acid A	390.277	-	69506-65-6
						C28H49O3N2	C24H38O4	Nutriacholic acid	390.277	-	4651-67-6
151	15.5622	959.322	249.196	253.222	71154.6	C15H25ON2	C11H14O2	4-t-Butylbenzoic acid	178.099	C14535	98-73-7
						C15H25ON2	C11H14O2	5-Phenylvaleric acid	178.099	-	-
152	15.6347	961.631	283.238	287.263	218644	C16H31O2N2	C12H20O3	Cucurbic acid	212.141	-	-
153	15.6261	961.726	227.212	231.237	667348	C13H27ON2	C9H16O2	2,6-Dimethyl-5-heptenoic acid	156.115	-	-
						C13H27ON2	C9H16O2	2-Amyl 3-butenoic acid	156.115	-	-
						C13H27ON2	C9H16O2	2E-Nonenoic acid	156.115	-	-
						C13H27ON2	C9H16O2	6-Methyl-5-octenoic acid	156.115	-	-
						C13H27ON2	C9H16O2	8-Nonylenic acid	156.115	-	-
						C13H27ON2	C9H16O2	3Z-Nonenoic acid	156.115	-	-
						C13H27ON2	C9H16O2	4E-Nonenoic acid	156.115	-	-
						C13H27ON2	C9H16O2	6E-Nonenoic acid	156.115	-	-
						C13H27ON2	C9H16O2	6Z-Nonenoic acid	156.115	-	-
						C13H27ON2	C9H16O2	8-Nonylenic acid	156.115	-	-
						C13H27ON2	C9H16O2	C9:1n-3	156.115	-	-
						C13H27ON2	C9H16O2	C9:1n-5	156.115	-	-
						C13H27ON2	C9H16O2	C9:1n-6	156.115	-	-
						C13H27ON2	C9H16O2	C9:1n-7	156.115	-	-
						C13H27ON2	C9H16O2	α-Nonylenic acid	156.115	-	-
						C13H27ON2	C9H16O2	β-Nonylenic acid	156.115	-	-
154	15.6902	964.181	339.264	343.289	2.01539e+06	C19H35O3N2	C15H24O4	Acoric acid	268.168	-	5956-06-9
155	15.7546	966.407	285.254	289.279	102017	C16H33O2N2	C12H22O3	10-Hydroxy-11-Dodecenoic acid	214.157	-	-
						C16H33O2N2	C12H22O3	11-Oxo-dodecanoic acid	214.157	-	-
						C16H33O2N2	C12H22O3	12-Hydroxy-10-Dodecenoic acid	214.157	-	-
						C16H33O2N2	C12H22O3	12-Hydroxy-3Z-Dodecenoic acid	214.157	-	-
						C16H33O2N2	C12H22O3	12-Oxo-dodecanoic acid	214.157	-	-
						C16H33O2N2	C12H22O3	2-Oxo-dodecanoic acid	214.157	-	-
						C16H33O2N2	C12H22O3	3-Oxo-dodecanoic acid	214.157	-	-
						C16H33O2N2	C12H22O3	3R-Hydroxy-5Z-dodecenoic acid	214.157	-	-
						C16H33O2N2	C12H22O3	5-Oxododecanoic acid	214.157	-	-
						C16H33O2N2	C12H22O3	7-Oxododecanoic acid	214.157	-	-
						C16H33O2N2	C12H22O3	9-Keto Lauric acid	214.157	-	-
						C16H33O2N2	C12H22O3	4-Keto lauric acid	214.157	-	-
						C16H33O2N2	C12H22O3	5-Dodecenoic acid, 3-hydroxy-, [R-(Z)]-	241.157	-	-
156	15.8132	968.863	287.233	291.258	380643	C15H31O3N2	C11H20O4	Undecanedioic acid	216.136	-	-
157	16.0224	977.271	241.228	245.253	101202	C14H29ON2	C10H18O2	Citronellic acid	170.031	C16462	502-47-6
						C14H29ON2	C10H18O2	2,7-Dimethyl-6-octenoic acid	170.031	-	-
						C14H29ON2	C10H18O2	2-Decylenic acid	170.031	-	-
						C14H29ON2	C10H18O2	3,7-Dimethyl-2-octenoic acid	170.031	-	-
						C14H29ON2	C10H18O2	3-Decylenic acid	170.031	-	-
						C14H29ON2	C10H18O2	3-Methyl-2-nonenoic acid	170.031	-	-
						C14H29ON2	C10H18O2	3Z-Decenoic acid	170.031	-	-
						C14H29ON2	C10H18O2	4Z-Decenoic acid	170.031	-	-
						C14H29ON2	C10H18O2	8-Methyl-6-nonenoic acid	170.031	C18202	-
						C14H29ON2	C10H18O2	8-Methylnonenoate	170.031	-	59320-77-3
						C14H29ON2	C10H18O2	9-Decenoic acid	170.031	-	14436-32-9
						C14H29ON2	C10H18O2	C10:1n-6	170.031	-	-
						C14H29ON2	C10H18O2	C10:1n-7	170.031	-	-
						C14H29ON2	C10H18O2	Caproleic acid	170.031	-	-
						C14H29ON2	C10H18O2	Cis-dec-2-enoic acid	170.031	-	-
						C14H29ON2	C10H18O2	Isodecenoic acid	170.031	-	-
						C14H29ON2	C10H18O2	Obtusilic acid	170.031	-	-
158	16.0579	978.775	321.253	325.278	971106	C19H33O2N2	C15H22O3	Valerenolic acid	250.157	-	1619-16-5
						C19H33O2N2	C15H22O3	Gemfibrozil	250.157	C07020	25812-30-0
159	16.1201	981.249	267.243	271.268	124809	C16H31ON2	C12H20O2	2E,4E-Dodecadienoic acid	196.146	-	-
						C16H31ON2	C12H20O2	2E,6Z-Dodecadienoic acid	196.146	-	-
						C16H31ON2	C12H20O2	2E,8E-Dodecadienoic acid	196.146	-	-
						C16H31ON2	C12H20O2	2E,8Z-Dodecadienoic acid	196.146	-	-
						C16H31ON2	C12H20O2	2Z,8E-Dodecadienoic acid	196.146	-	-
						C16H31ON2	C12H20O2	2Z,8Z-Dodecadienoic acid	196.146	-	-
						C16H31ON2	C12H20O2	5E,7E-Dodecadienoic acid	196.146	-	-
						C16H31ON2	C12H20O2	7Z,9E-Dodecadienoic acid	196.146	-	-
						C16H31ON2	C12H20O2	8E,10E-Dodecadienoic acid	196.146	-	-
						C16H31ON2	C12H20O2	8Z,10E-Dodecadienoic acid	196.146	-	-
						C16H31ON2	C12H20O2	Aleprylic acid	196.146	-	-
						C16H31ON2	C12H20O2	C12:2n-3,5	196.146	-	-
						C16H31ON2	C12H20O2	C12:2n-5,7	196.146	-	-
						C16H31ON2	C12H20O2	C12:2n-6,10	196.146	-	-
						C16H31ON2	C12H20O2	Cis,cis-Dodeca-3,6-dienoic acid	196.146	-	-
160	16.1631	982.85	285.254	289.279	139201	C16H33O2N2	C12H22O3	10-Hydroxy-11-Dodecenoic acid	214.157	-	-
						C16H33O2N2	C12H22O3	11-Oxo-dodecanoic acid	214.157	-	-
						C16H33O2N2	C12H22O3	12-Hydroxy-10-Dodecenoic acid	214.157	-	-
						C16H33O2N2	C12H22O3	12-Hydroxy-3Z-Dodecenoic acid	214.157	-	-
						C16H33O2N2	C12H22O3	12-Oxo-dodecanoic acid	214.157	-	-
						C16H33O2N2	C12H22O3	2-Oxo-dodecanoic acid	214.157	-	-
						C16H33O2N2	C12H22O3	3-Oxo-dodecanoic acid	214.157	-	-
						C16H33O2N2	C12H22O3	3R-Hydroxy-5Z-dodecenoic acid	214.157	-	-
						C16H33O2N2	C12H22O3	5-Oxododecanoic acid	214.157	-	-
						C16H33O2N2	C12H22O3	7-Oxododecanoic acid	214.157	-	-
						C16H33O2N2	C12H22O3	9-Keto Lauric acid	214.157	-	-
						C16H33O2N2	C12H22O3	4-Keto lauric acid	214.157	-	-
						C16H33O2N2	C12H22O3	5-Dodecenoic acid, 3-hydroxy-, [R-(Z)]-	241.157	-	-
161	16.2552	986.604	315.301	319.326	148333	C18H39O2N2	C14H28O3	10-Hydroxy-tetradecanoic acid	244.204	-	-
						C18H39O2N2	C14H28O3	11-Hydroxy-tetradecanoic acid	244.204	-	-
						C18H39O2N2	C14H28O3	2-Hydroxymyristic Acid	244.204	-	2507-55-3
						C18H39O2N2	C14H28O3	3-Hydroxy-tetradecanoic acid	244.204	-	3422-31-9
						C18H39O2N2	C14H28O3	5-Hydroxy-tetradecanoic acid	244.204	-	-
						C18H39O2N2	C14H28O3	6-Hydroxy-tetradecanoic acid	244.204	-	-
						C18H39O2N2	C14H28O3	7-Hydroxytetradecanoic acid	244.204	-	-
						C18H39O2N2	C14H28O3	Omega-hydroxy myristic acid	244.204	-	-
						C18H39O2N2	C14H28O3	α-Hydroxy myristic acid	244.204	C13790	-
162	16.3281	989.323	257.223	261.248	67815.1	C14H29O2N2	C10H18O3	(3R)-6-Hydroxy-3-isopropenyl-heptanoate	186.126	C11404	-
						C14H29O2N2	C10H18O3	(3S)-6-Hydroxy-3-isopropenyl-heptanoate	186.126	C11417	-
						C14H29O2N2	C10H18O3	(5R)-6-Hydroxy-5-isopropenyl-2-methylhexanoate	186.126	C11406	-
						C14H29O2N2	C10H18O3	(5S)-6-Hydroxy-5-isopropenyl-2-methylhexanoate	186.126	C11420	-
						C14H29O2N2	C10H18O3	(R,E)-9-Hydroxy-2-decenoic acid	186.126	-	-
						C14H29O2N2	C10H18O3	(S,E)-(+)-9-Hydroxy-2-decenoic acid	186.126	-	-
						C14H29O2N2	C10H18O3	10-Hydroxy-2E-decenoic acid	186.126	-	-
						C14H29O2N2	C10H18O3	10-Hydroxy-2Z-decenoic acid	186.126	-	-
						C14H29O2N2	C10H18O3	10-Hydroxy-8E-decenoic acid	186.126	-	-
						C14H29O2N2	C10H18O3	10-Oxo-decanoic acid	186.126	-	-
						C14H29O2N2	C10H18O3	2-Oxo capric acid	186.126	C13945	-
						C14H29O2N2	C10H18O3	3-Oxo capric acid	186.126	-	-
						C14H29O2N2	C10H18O3	4-Oxo capric acid	186.126	-	-
						C14H29O2N2	C10H18O3	5-Oxo capric acid	186.126	-	-
						C14H29O2N2	C10H18O3	6-Hydroxy-3-isopropenylheptanoic acid	186.126	-	-
						C14H29O2N2	C10H18O3	6-Oxo capric acid	186.126	-	-
						C14H29O2N2	C10H18O3	7-Oxo-decanoic acid	186.126	-	-
						C14H29O2N2	C10H18O3	8-Oxo capric acid	186.126	-	-
						C14H29O2N2	C10H18O3	9-Hydroxy-2E-decenoic acid	186.126	-	-
						C14H29O2N2	C10H18O3	9-Oxo capric acid	186.126	-	-
						C14H29O2N2	C10H18O3	9R-Hydroxy-2E-decenoic acid	186.126	-	-
						C14H29O2N2	C10H18O3	9S-Hydroxy-2E-decenoic acid	186.126	-	-
163	16.3566	990.607	359.327	363.352	56060.5	C20H43O3N2	C16H32O4	10,16-Dihydroxy-palmitic acid	288.23	C08285	69232-67-3
						C20H43O3N2	C16H32O4	3,12-Dihydroxy palmitic acid	288.23	-	-
						C20H43O3N2	C16H32O4	4,12-Dihydroxy-hexadecanoic acid	288.23	-	-
						C20H43O3N2	C16H32O4	9,10-Dihydroxy-hexadecanoic acid	288.23	-	-
						C20H43O3N2	C16H32O4	9,16-Dihydroxy-palmitic acid	288.23	-	-
						C20H43O3N2	C16H32O4	Ustilic acid A	288.23	-	-
164	16.3768	990.924	383.327	387.352	77414.1	C22H43O3N2	C18H32O4	10-Oxo-13-hydroxy-11-octadecenoic acid	312.23	-	-
						C22H43O3N2	C18H32O4	12-Oxo,13-hydroxy-9Z-octadecenoic acid	312.23	-	-
						C22H43O3N2	C18H32O4	12-Oxo-13-hydroxy-9-octadecenoic acid	312.23	-	-
						C22H43O3N2	C18H32O4	5S,8R-DiHODE	312.23	-	-
						C22H43O3N2	C18H32O4	7S,8S-DiHODE	312.23	-	-
						C22H43O3N2	C18H32O4	8,13-DiHODE	312.23	-	-
						C22H43O3N2	C18H32O4	8,13-Dihydroxy-9,11-octadecadienoic acid	312.23	C14831	-
						C22H43O3N2	C18H32O4	8R,11S-DiHODE	312.23	-	-
						C22H43O3N2	C18H32O4	9,10-Dioxo-octadecanoic acid	312.23	-	-
						C22H43O3N2	C18H32O4	9,14-DiHODE	312.23	-	-
						C22H43O3N2	C18H32O4	9,14-Dihydroxy-10,12-octadecadienoic acid	312.23	C07338	-
						C22H43O3N2	C18H32O4	9-Hydroxy-10-oxo-12(Z)-octadecenoic acid	312.23	C19618	-
						C22H43O3N2	C18H32O4	9-Hydroxy-10-oxo-12-octadecenoic acid	312.23	-	-
						C22H43O3N2	C18H32O4	9-Hydroxy-12-oxo-10-octadecenoic acid	312.23	-	-
						C22H43O3N2	C18H32O4	9-Hydroxy-13-oxo-10-octadecenoic acid	312.23	-	-
						C22H43O3N2	C18H32O4	9-Oxo-13-hydroxy-11-octadecenoic acid	312.23	-	-
						C22H43O3N2	C18H32O4	α-12,13-DiHODE	312.23	C04717	33964-75-9
						C22H43O3N2	C18H32O4	α-15,16-DiHODE	312.23	-	-
						C22H43O3N2	C18H32O4	α-9,10-DiHODE	312.23	C14827	29774-12-7
						C22H43O3N2	C18H32O4	γ- 12,13-DiHODE	312.23	-	-
						C22H43O3N2	C18H32O4	γ- 6,7-DiHODE	312.23	-	-
						C22H43O3N2	C18H32O4	γ- 9,10-DiHODE	312.23	-	-
165	16.3832	991.792	309.254	313.279	103120	C18H33O2N2	C14H22O3	(9R,13R)-1a,1b-Dihomo-jasmonic acid	238.157	-	-
						C18H33O2N2	C14H22O3	(9S,13S)-1a,1b-Dihomo-jasmonic acid	238.157	-	-
						C18H33O2N2	C14H22O3	7-Oxo-11E,13-Tetradecadienoic acid	238.157	-	-
166	16.4355	994.551	253.228	257.253	159323	C15H29ON2	C11H18O2	10-Undecynoic acid	182.131	-	-
						C15H29ON2	C11H18O2	2E,4E-Undecadienoic acid	182.131	-	-
						C15H29ON2	C11H18O2	2-Undecynoic acid	182.131	-	-
						C15H29ON2	C11H18O2	3-Undecynoic acid	182.131	-	-
						C15H29ON2	C11H18O2	4-Undecynoic acid	182.131	-	-
						C15H29ON2	C11H18O2	5-Undecynoic acid	182.131	-	-
						C15H29ON2	C11H18O2	6-Undecynoic acid	182.131	-	-
						C15H29ON2	C11H18O2	7-Undecynoic acid	182.131	-	-
						C15H29ON2	C11H18O2	8-Undecynoic acid	182.131	-	-
						C15H29ON2	C11H18O2	9-Undecynoic acid	182.131	-	-
						C15H29ON2	C11H18O2	C11:2n-7,9	182.131	-	-
						C15H29ON2	C11H18O2	Decahydro-2-naphthoic acid	182.131	C14113	13032-41-2
167	16.439	996.037	271.238	275.263	146451	C15H31O2N2	C11H20O3	9-Acetyl pelargonic acid	200.141	-	-
						C15H31O2N2	C11H20O3	(S)-9-Hydroxy-10-undecenoic acid	200.141	-	-
						C15H31O2N2	C11H20O3	10-Undecenoic acid, 2-hydroxy-, (R)-	200.141	-	-
						C15H31O2N2	C11H20O3	10-Undecenoic acid, 2-hydroxy-, (S)-	200.141	-	-
						C15H31O2N2	C11H20O3	2-Hydroxy-10-undecenoic acid	200.141	-	-
						C15H31O2N2	C11H20O3	2-Oxo-undecanoic acid	200.141	-	-
						C15H31O2N2	C11H20O3	2R-Hydroxy-10-undecenoic acid	200.141	-	-
						C15H31O2N2	C11H20O3	2S-Hydroxy-10-undecenoic acid	200.141	-	-
						C15H31O2N2	C11H20O3	3-Capryl propionic acid	200.141	-	-
						C15H31O2N2	C11H20O3	4-Heptanoyl butyric acid	200.141	-	-
						C15H31O2N2	C11H20O3	8-Propionyl caprylic acid	200.141	-	-
						C15H31O2N2	C11H20O3	Pelargonyl acetic acid	200.141	-	-
168	16.5361	997.564	299.233	303.258	86251.5	C16H31O3N2	C12H20O4	(-)-11-Hydroxy-9,10-dihydrojasmonic acid	228.136	-	-
						C16H31O3N2	C12H20O4	(-)-12-Hydroxy-9,10-dihydrojasmonic acid	228.136	-	-
						C16H31O3N2	C12H20O4	5-Heptyltetrahydro-2-oxo-3-furancarboxylic acid	228.136	-	-
						C16H31O3N2	C12H20O4	9,12-Dioxo-dodecanoic acid	228.136	-	-
						C16H31O3N2	C12H20O4	Traumatic acid	228.136	C16308	6402-36-4
169	16.7152	1005.22	377.28	381.305	206762	C22H37O3N2	C18H26O4	Tetranor Iloprost	306.183	-	93220-69-0
170	16.7881	1008.9	321.253	325.278	4.58771e+06	C19H33O2N2	C15H22O3	Valerenolic acid	250.157	-	1619-16-5
						C19H33O2N2	C15H22O3	Gemfibrozil	250.157	C07020	25812-30-0
171	17.0727	1022.01	287.233	291.258	59322.3	C15H31O3N2	C11H20O4	Undecanedioic acid	216.136	-	-
172	17.153	1025.66	407.327	411.352	62912.8	C24H43O3N2	C20H32O4	(14S)-14,15-Dihydroxy-8(17),13(16)-labdadien-19-oic acid	336.23	-	-
						C24H43O3N2	C20H32O4	10,11-Dihydro-12-oxo-LTB4	336.23	-	-
						C24H43O3N2	C20H32O4	11H-14,15-EETA	336.23	-	219535-29-2
						C24H43O3N2	C20H32O4	12(S)-HPETE	336.23	-	71774-10-2
						C24H43O3N2	C20H32O4	12(S)-Leukotriene B4	336.23	-	83709-73-3
						C24H43O3N2	C20H32O4	12,20-DiHETE	336.23	-	-
						C24H43O3N2	C20H32O4	14,15-DiHETE	336.23	-	-
						C24H43O3N2	C20H32O4	15(S)-HPETE	336.23	-	70981-96-3
						C24H43O3N2	C20H32O4	15H-11,12-EETA	336.23	-	877878-78-9
						C24H43O3N2	C20H32O4	17,18-DiHETE	336.23	-	-
						C24H43O3N2	C20H32O4	5,15-DiHETE	336.23	-	82200-87-1
						C24H43O3N2	C20H32O4	6,7-Dihydro-5-oxo-12-epi-LTB4	336.23	-	-
						C24H43O3N2	C20H32O4	6-Trans-12-epi-Leukotriene B4	336.23	-	71548-19-1
						C24H43O3N2	C20H32O4	6-Trans-Leukotriene B4	336.23	-	71652-82-9
						C24H43O3N2	C20H32O4	8,15-DiHETE	336.23	-	77667-08-4
						C24H43O3N2	C20H32O4	8-Iso-PGA1	336.23	-	-
						C24H43O3N2	C20H32O4	9-Deoxy-delta12-PGD2	336.23	-	-
						C24H43O3N2	C20H32O4	Ent-1(10)-Halimene-15,19-dioic acid	336.23	-	-
						C24H43O3N2	C20H32O4	Hepoxilin A3	336.23	-	85589-24-8
						C24H43O3N2	C20H32O4	Hepoxilin B3	336.23	-	-
						C24H43O3N2	C20H32O4	Leukotriene B4	336.23	-	71160-24-2
						C24H43O3N2	C20H32O4	Prostaglandin A1	336.23	-	14152-28-4
						C24H43O3N2	C20H32O4	Prostaglandin B1	336.23	-	13345-51-2
						C24H43O3N2	C20H32O4	Prostaglandin C1	336.23	-	-
173	17.1624	1025.97	257.223	261.248	86511	C14H29O2N2	C10H18O3	(3R)-6-Hydroxy-3-isopropenyl-heptanoate	186.126	C11404	-
						C14H29O2N2	C10H18O3	(3S)-6-Hydroxy-3-isopropenyl-heptanoate	186.126	C11417	-
						C14H29O2N2	C10H18O3	(5R)-6-Hydroxy-5-isopropenyl-2-methylhexanoate	186.126	C11406	-
						C14H29O2N2	C10H18O3	(5S)-6-Hydroxy-5-isopropenyl-2-methylhexanoate	186.126	C11420	-
						C14H29O2N2	C10H18O3	(R,E)-9-Hydroxy-2-decenoic acid	186.126	-	-
						C14H29O2N2	C10H18O3	(S,E)-(+)-9-Hydroxy-2-decenoic acid	186.126	-	-
						C14H29O2N2	C10H18O3	10-Hydroxy-2E-decenoic acid	186.126	-	-
						C14H29O2N2	C10H18O3	10-Hydroxy-2Z-decenoic acid	186.126	-	-
						C14H29O2N2	C10H18O3	10-Hydroxy-8E-decenoic acid	186.126	-	-
						C14H29O2N2	C10H18O3	10-Oxo-decanoic acid	186.126	-	-
						C14H29O2N2	C10H18O3	2-Oxo capric acid	186.126	C13945	-
						C14H29O2N2	C10H18O3	3-Oxo capric acid	186.126	-	-
						C14H29O2N2	C10H18O3	4-Oxo capric acid	186.126	-	-
						C14H29O2N2	C10H18O3	5-Oxo capric acid	186.126	-	-
						C14H29O2N2	C10H18O3	6-Hydroxy-3-isopropenylheptanoic acid	186.126	-	-
						C14H29O2N2	C10H18O3	6-Oxo capric acid	186.126	-	-
						C14H29O2N2	C10H18O3	7-Oxo-decanoic acid	186.126	-	-
						C14H29O2N2	C10H18O3	8-Oxo capric acid	186.126	-	-
						C14H29O2N2	C10H18O3	9-Hydroxy-2E-decenoic acid	186.126	-	-
						C14H29O2N2	C10H18O3	9-Oxo capric acid	186.126	-	-
						C14H29O2N2	C10H18O3	9R-Hydroxy-2E-decenoic acid	186.126	-	-
						C14H29O2N2	C10H18O3	9S-Hydroxy-2E-decenoic acid	186.126	-	-
174	17.268	1030.24	387.358	391.383	98671.2	C22H47O3N2	C18H36O4	(9S,10S)-9,10-Dihydroxyoctadecanoic acid	316.261	C15988	-
						C22H47O3N2	C18H36O4	10,11-Dihydroxy stearic acid	316.261	-	-
						C22H47O3N2	C18H36O4	11,12-Dihydroxy stearic acid	316.261	-	-
						C22H47O3N2	C18H36O4	12,13-Dihydroxy stearic acid	316.261	-	-
						C22H47O3N2	C18H36O4	15,16-Dihydroxy-octadecanoic acid	316.261	-	-
						C22H47O3N2	C18H36O4	2,3-Dihydroxy stearic acid	316.261	-	-
						C22H47O3N2	C18H36O4	4,14-Dihydroxy-octadecanoic acid	316.261	-	-
						C22H47O3N2	C18H36O4	5,6-Dihydroxy stearic acid	316.261	-	-
						C22H47O3N2	C18H36O4	6,7-Dihydroxy stearic acid	316.261	-	-
						C22H47O3N2	C18H36O4	7,8-Dihydroxy stearic acid	316.261	-	-
						C22H47O3N2	C18H36O4	8,9-Dihydroxy stearic acid	316.261	-	-
						C22H47O3N2	C18H36O4	9,10-Dihydroxy stearic acid	316.261	C19622	-
						C22H47O3N2	C18H36O4	9,12-Dihydroxy stearic acid	316.261	-	-
						C22H47O3N2	C18H36O4	9,14-Dihydroxy-octadecanoic acid	316.261	-	-
175	17.2843	1031.75	339.264	343.29	135170	C19H35O3N2	C15H24O4	Acoric acid	268.168	-	5956-06-9
176	17.391	1036.19	461.374	465.399	191510	C28H49O3N2	C24H38O4	12-Ketodeoxycholic acid	390.277	-	5130-29-0
						C28H49O3N2	C24H38O4	7a-Hydroxy-3-oxo-5b-cholanoic acid	390.277	-	4185-00-6
						C28H49O3N2	C24H38O4	7-Hydroxy-3-oxocholanoic acid	390.277	-	77059-13-3
						C28H49O3N2	C24H38O4	9'-Carboxy-alpha-chromanol	390.277	-	-
						C28H49O3N2	C24H38O4	D8'-Merulinic acid A	390.277	-	69506-65-6
						C28H49O3N2	C24H38O4	Nutriacholic acid	390.277	-	4651-67-6
177	17.4822	1040.29	395.327	399.352	95388.7	C23H43O3N2	C19H32O4	TOFA	324.23	-	54857-86-2
178	17.498	1040.97	277.227	281.253	390409	C17H29ON2	C13H18O2	(±)-Ibuprofen	206.131	C01588	15687-27-1
179	17.686	1049.45	253.228	257.253	157163	C15H29ON2	C11H18O2	10-Undecynoic acid	182.131	-	-
						C15H29ON2	C11H18O2	2E,4E-Undecadienoic acid	182.131	-	-
						C15H29ON2	C11H18O2	2-Undecynoic acid	182.131	-	-
						C15H29ON2	C11H18O2	3-Undecynoic acid	182.131	-	-
						C15H29ON2	C11H18O2	4-Undecynoic acid	182.131	-	-
						C15H29ON2	C11H18O2	5-Undecynoic acid	182.131	-	-
						C15H29ON2	C11H18O2	6-Undecynoic acid	182.131	-	-
						C15H29ON2	C11H18O2	7-Undecynoic acid	182.131	-	-
						C15H29ON2	C11H18O2	8-Undecynoic acid	182.131	-	-
						C15H29ON2	C11H18O2	9-Undecynoic acid	182.131	-	-
						C15H29ON2	C11H18O2	C11:2n-7,9	182.131	-	-
						C15H29ON2	C11H18O2	Decahydro-2-naphthoic acid	182.131	C14113	13032-41-2
180	17.6841	1049.6	385.343	389.368	177250	C22H45O3N2	C18H34O4	(9xi,10xi,12xi)-9,10-Dihydroxy-12-octadecenoic acid	314.246	-	-
						C22H45O3N2	C18H34O4	(±)12,13-DiHOME	314.246	-	263399-35-5
						C22H45O3N2	C18H34O4	12,13-DiHOME	314.246	C14829	-
						C22H45O3N2	C18H34O4	12,13-DiHOME(9)	314.246	-	-
						C22H45O3N2	C18H34O4	12,13-Dihydroxy-9-octadecenoic acid	314.246	-	-
						C22H45O3N2	C18H34O4	18-Hydroxy-9R,10S-epoxy-stearic acid	314.246	-	-
						C22H45O3N2	C18H34O4	18-Hydroxy-9S,10R-epoxy-stearic acid	314.246	-	-
						C22H45O3N2	C18H34O4	5S,8R-DiHOME	314.246	-	-
						C22H45O3N2	C18H34O4	7S,8S-DiHOME(9Z)	314.246	C07355	-
						C22H45O3N2	C18H34O4	8R,11S-DiHOME	314.246	-	-
						C22H45O3N2	C18H34O4	8R-HpOME	314.246	-	-
						C22H45O3N2	C18H34O4	9,10-DiHOME	314.246	C14828	263399-34-4
						C22H45O3N2	C18H34O4	9,10-DiHOME(12)	314.246	-	-
						C22H45O3N2	C18H34O4	9,10-Dihydroxy-12-octadecenoic acid	314.246	-	-
						C22H45O3N2	C18H34O4	9,10-Epoxy-18-hydroxystearate	314.246	C19620	-
						C22H45O3N2	C18H34O4	9,13-DiHOME(10)	314.246	-	-
						C22H45O3N2	C18H34O4	9,13-DiHOME(11)	314.246	-	-
						C22H45O3N2	C18H34O4	9,13-Dihydroxy-10-octadecenoic acid	314.246	-	-
						C22H45O3N2	C18H34O4	9,13-Dihydroxy-11-octadecenoic acid	314.246	-	-
181	17.7483	1052.51	349.285	353.309	3.72152e+07	C21H37O2N2	C17H26O3	12-Oxo-5E,8E,10Z-heptadecatrienoic acid	278.188	-	-
						C21H37O2N2	C17H26O3	7-Hydroxy-10E,16-heptadecadien-8-ynoic acid	278.188	-	-
						C21H37O2N2	C17H26O3	Acetylenic acids	278.188	-	-
182	17.9766	1062.77	377.28	381.305	1.39757e+06	C22H37O3N2	C18H26O4	Tetranor Iloprost	306.183	-	93220-69-0
183	18.0344	1065.56	269.259	273.284	131032	C16H33ON2	C12H22O2	10-Lauroleic acid	198.162	-	-
						C16H33ON2	C12H22O2	10Z-Dodecenoic acid	198.162	-	-
						C16H33ON2	C12H22O2	11-Lauroleic acid	198.162	-	-
						C16H33ON2	C12H22O2	2-Lauroleic acid	198.162	-	-
						C16H33ON2	C12H22O2	2Z-Dodecenoic acid	198.162	-	-
						C16H33ON2	C12H22O2	5-Methyl-2-undecenoic acid	198.162	-	-
						C16H33ON2	C12H22O2	6-Lauroleic acid	198.162	-	-
						C16H33ON2	C12H22O2	6Z-Dodecenoic acid	198.162	-	-
						C16H33ON2	C12H22O2	7-Lauroleic acid	198.162	-	-
						C16H33ON2	C12H22O2	7Z-Dodecenoic acid	198.162	-	-
						C16H33ON2	C12H22O2	9-Lauroleic acid	198.162	-	-
						C16H33ON2	C12H22O2	9Z-Dodecenoic acid	198.162	-	-
						C16H33ON2	C12H22O2	C12:1n-10	198.162	-	-
						C16H33ON2	C12H22O2	C12:1n-2	198.162	-	-
						C16H33ON2	C12H22O2	C12:1n-3	198.162	-	-
						C16H33ON2	C12H22O2	C12:1n-5	198.162	-	-
						C16H33ON2	C12H22O2	C12:1n-6	198.162	-	-
						C16H33ON2	C12H22O2	C12:1n-7	198.162	-	-
						C16H33ON2	C12H22O2	Cis-5-Dodecenoic acid	198.162	-	2430-94-6
						C16H33ON2	C12H22O2	Cis-dodec-3-Enoic acid	198.162	-	-
						C16H33ON2	C12H22O2	Linderic acid	198.162	-	-
						C16H33ON2	C12H22O2	Trans-dodec-3-Enoic acid	198.162	-	-
184	18.1006	1068.36	301.248	305.273	3.82862e+06	C16H33O3N2	C12H22O4	Dodecanedioic acid	230.152	C02678	693-23-2
185	18.1308	1070.23	319.274	323.3	517542	C20H35ON2	C16H24O2	16:4(4Z,7Z,10Z,13Z)	248.178	-	-
						C20H35ON2	C16H24O2	16:4(6,9,12,15)	248.178	-	-
						C20H35ON2	C16H24O2	16:4(6Z,9Z,12Z,15Z)	248.178	-	-
						C20H35ON2	C16H24O2	2E,6Z,8Z,12E-Hexadecatetraenoic acid	248.178	-	-
						C20H35ON2	C16H24O2	2E,6Z,8Z,12Z-Hexadecatetraenoic acid	248.178	-	-
						C20H35ON2	C16H24O2	2Z,6Z,8Z,12E-Hexadecatetraenoic acid	248.178	-	-
						C20H35ON2	C16H24O2	2Z,6Z,8Z,12Z-Hexadecatetraenoic acid	248.178	-	-
						C20H35ON2	C16H24O2	4,7,10,13-Hexadecatetraenoic acid	248.178	-	-
						C20H35ON2	C16H24O2	4,7,11,14-Hexadecatetraenoic acid	248.178	-	-
						C20H35ON2	C16H24O2	4,8,12,16-Hexadecatetraenoic acid	248.178	-	-
						C20H35ON2	C16H24O2	4-[3]-Ladderane-butanoic acid	248.178	-	-
						C20H35ON2	C16H24O2	4Z,7Z,10Z,13Z-Hexadecatetraenoic acid	248.178	-	-
						C20H35ON2	C16H24O2	6,9,12,15-Hexadecatetraenoic acid	248.178	-	-
						C20H35ON2	C16H24O2	C16:4n-0,4,8,12	248.178	-	-
						C20H35ON2	C16H24O2	C16:4n-2,5,9,12	248.178	-	-
186	18.2032	1072.73	307.238	311.263	173158	C18H31O2N2	C14H20O3	4-Heptyloxybenzoic acid	236.141	C14274	15872-42-1
187	18.201	1073.14	257.259	261.284	570329	C15H33ON2	C11H22O2	2-Methyl-decanoic aci	186.162	-	-
						C15H33ON2	C11H22O2	3,3-Dimethyl-nonanoic acid	186.162	-	-
						C15H33ON2	C11H22O2	3-Methyl-decanoic acid	186.162	-	-
						C15H33ON2	C11H22O2	4,8-Dimethyl-nonanoic acid	186.162	-	-
						C15H33ON2	C11H22O2	4-Methyl-decanoic acid	186.162	-	-
						C15H33ON2	C11H22O2	5-Methyl-decanoic acid	186.162	-	-
						C15H33ON2	C11H22O2	6-Methyl-decanoic acid	186.162	-	-
						C15H33ON2	C11H22O2	7-Methyl-decanoic acid	186.162	-	-
						C15H33ON2	C11H22O2	8-Methyl-decanoic acid	186.162	-	-
						C15H33ON2	C11H22O2	9-Methyl-decanoic acid	186.162	-	-
						C15H33ON2	C11H22O2	Decanoic acid, 5-methyl-, (R)-	186.162	-	-
						C15H33ON2	C11H22O2	Undecanoic acid	186.162	C17715	112-37-8
188	18.1907	1074.77	383.327	387.352	2.32018e+06	C22H43O3N2	C18H32O4	10-Oxo-13-hydroxy-11-octadecenoic acid	312.23	-	-
						C22H43O3N2	C18H32O4	12-Oxo,13-hydroxy-9Z-octadecenoic acid	312.23	-	-
						C22H43O3N2	C18H32O4	12-Oxo-13-hydroxy-9-octadecenoic acid	312.23	-	-
						C22H43O3N2	C18H32O4	5S,8R-DiHODE	312.23	-	-
						C22H43O3N2	C18H32O4	7S,8S-DiHODE	312.23	-	-
						C22H43O3N2	C18H32O4	8,13-DiHODE	312.23	-	-
						C22H43O3N2	C18H32O4	8,13-Dihydroxy-9,11-octadecadienoic acid	312.23	C14831	-
						C22H43O3N2	C18H32O4	8R,11S-DiHODE	312.23	-	-
						C22H43O3N2	C18H32O4	9,10-Dioxo-octadecanoic acid	312.23	-	-
						C22H43O3N2	C18H32O4	9,14-DiHODE	312.23	-	-
						C22H43O3N2	C18H32O4	9,14-Dihydroxy-10,12-octadecadienoic acid	312.23	C07338	-
						C22H43O3N2	C18H32O4	9-Hydroxy-10-oxo-12(Z)-octadecenoic acid	312.23	C19618	-
						C22H43O3N2	C18H32O4	9-Hydroxy-10-oxo-12-octadecenoic acid	312.23	-	-
						C22H43O3N2	C18H32O4	9-Hydroxy-12-oxo-10-octadecenoic acid	312.23	-	-
						C22H43O3N2	C18H32O4	9-Hydroxy-13-oxo-10-octadecenoic acid	312.23	-	-
						C22H43O3N2	C18H32O4	9-Oxo-13-hydroxy-11-octadecenoic acid	312.23	-	-
						C22H43O3N2	C18H32O4	α-12,13-DiHODE	312.23	C04717	33964-75-9
						C22H43O3N2	C18H32O4	α-15,16-DiHODE	312.23	-	-
						C22H43O3N2	C18H32O4	α-9,10-DiHODE	312.23	C14827	29774-12-7
						C22H43O3N2	C18H32O4	γ- 12,13-DiHODE	312.23	-	-
						C22H43O3N2	C18H32O4	γ- 6,7-DiHODE	312.23	-	-
						C22H43O3N2	C18H32O4	γ- 9,10-DiHODE	312.23	-	-
189	18.2949	1077.23	311.269	315.294	124737	C18H35O2N2	C14H24O3	(1R,2R)-3-Oxo-2-pentyl-cyclopentanebutanoic acid	240.173	-	-
						C18H35O2N2	C14H24O3	(1S,2S)-3-Oxo-2-pentyl-cyclopentanebutanoic acid	240.173	-	-
						C18H35O2N2	C14H24O3	7-Oxo-11-Tetradecenoic acid	240.173	-	-
190	18.3496	1079.41	385.342	389.367	147675	C22H45O3N2	C18H34O4	(9xi,10xi,12xi)-9,10-Dihydroxy-12-octadecenoic acid	314.246	-	-
						C22H45O3N2	C18H34O4	(±)12,13-DiHOME	314.246	-	263399-35-5
						C22H45O3N2	C18H34O4	12,13-DiHOME	314.246	C14829	-
						C22H45O3N2	C18H34O4	12,13-DiHOME(9)	314.246	-	-
						C22H45O3N2	C18H34O4	12,13-Dihydroxy-9-octadecenoic acid	314.246	-	-
						C22H45O3N2	C18H34O4	18-Hydroxy-9R,10S-epoxy-stearic acid	314.246	-	-
						C22H45O3N2	C18H34O4	18-Hydroxy-9S,10R-epoxy-stearic acid	314.246	-	-
						C22H45O3N2	C18H34O4	5S,8R-DiHOME	314.246	-	-
						C22H45O3N2	C18H34O4	7S,8S-DiHOME(9Z)	314.246	C07355	-
						C22H45O3N2	C18H34O4	8R,11S-DiHOME	314.246	-	-
						C22H45O3N2	C18H34O4	8R-HpOME	314.246	-	-
						C22H45O3N2	C18H34O4	9,10-DiHOME	314.246	C14828	263399-34-4
						C22H45O3N2	C18H34O4	9,10-DiHOME(12)	314.246	-	-
						C22H45O3N2	C18H34O4	9,10-Dihydroxy-12-octadecenoic acid	314.246	-	-
						C22H45O3N2	C18H34O4	9,10-Epoxy-18-hydroxystearate	314.246	C19620	-
						C22H45O3N2	C18H34O4	9,13-DiHOME(10)	314.246	-	-
						C22H45O3N2	C18H34O4	9,13-DiHOME(11)	314.246	-	-
						C22H45O3N2	C18H34O4	9,13-Dihydroxy-10-octadecenoic acid	314.246	-	-
						C22H45O3N2	C18H34O4	9,13-Dihydroxy-11-octadecenoic acid	314.246	-	-
191	18.5467	1088.49	351.301	355.325	110433	C21H39O2N2	C17H28O3	12-Hydroxy-5,8,10-heptadecatrienoic acid	280.204	-	-
						C21H39O2N2	C17H28O3	12S-HHTrE	280.204	-	54397-84-1
						C21H39O2N2	C17H28O3	12S-Hydroxy-5Z,8E,10E-heptadecatrienoic acid	280.204	-	-
192	18.6518	1093.18	323.269	327.294	5.00746e+06	C19H35O2N2	C15H24O3	Juvenile hormone III acid	252.173	C16504	-
193	18.668	1093.82	269.259	273.284	400312	C16H33ON2	C12H22O2	10-Lauroleic acid	198.162	-	-
						C16H33ON2	C12H22O2	10Z-Dodecenoic acid	198.162	-	-
						C16H33ON2	C12H22O2	11-Lauroleic acid	198.162	-	-
						C16H33ON2	C12H22O2	2-Lauroleic acid	198.162	-	-
						C16H33ON2	C12H22O2	2Z-Dodecenoic acid	198.162	-	-
						C16H33ON2	C12H22O2	5-Methyl-2-undecenoic acid	198.162	-	-
						C16H33ON2	C12H22O2	6-Lauroleic acid	198.162	-	-
						C16H33ON2	C12H22O2	6Z-Dodecenoic acid	198.162	-	-
						C16H33ON2	C12H22O2	7-Lauroleic acid	198.162	-	-
						C16H33ON2	C12H22O2	7Z-Dodecenoic acid	198.162	-	-
						C16H33ON2	C12H22O2	9-Lauroleic acid	198.162	-	-
						C16H33ON2	C12H22O2	9Z-Dodecenoic acid	198.162	-	-
						C16H33ON2	C12H22O2	C12:1n-10	198.162	-	-
						C16H33ON2	C12H22O2	C12:1n-2	198.162	-	-
						C16H33ON2	C12H22O2	C12:1n-3	198.162	-	-
						C16H33ON2	C12H22O2	C12:1n-5	198.162	-	-
						C16H33ON2	C12H22O2	C12:1n-6	198.162	-	-
						C16H33ON2	C12H22O2	C12:1n-7	198.162	-	-
						C16H33ON2	C12H22O2	Cis-5-Dodecenoic acid	198.162	-	2430-94-6
						C16H33ON2	C12H22O2	Cis-dodec-3-Enoic acid	198.162	-	-
						C16H33ON2	C12H22O2	Linderic acid	198.162	-	-
						C16H33ON2	C12H22O2	Trans-dodec-3-Enoic acid	198.162	-	-
194	18.6431	1094.99	347.306	351.331	492743	C22H39ON2	C18H28O2	(9Z,12Z)-Octadeca-9,12-dien-6-ynoic acid	276.209	-	-
						C22H39ON2	C18H28O2	(9Z,14Z)-Octadeca-9,14-dien-6-ynoic acid	276.209	-	-
						C22H39ON2	C18H28O2	18:4(5Z,9Z,12Z,15Z)	276.209	-	75236-11-2
						C22H39ON2	C18H28O2	4,8,12,15-Octadecatetraenoic acid	276.209	-	67329-10-6
						C22H39ON2	C18H28O2	5,8,11,14-Octadecatetraenoic acid	276.209	-	-
						C22H39ON2	C18H28O2	6-[3]-Ladderane-hexanoic acid	276.209	-	-
						C22H39ON2	C18H28O2	Acetylenic acids; 11,13-Octadecadien-9-ynoic acid, (E,E)-	276.209	-	-
						C22H39ON2	C18H28O2	Beta-Parinaric acid	276.209	-	-
						C22H39ON2	C18H28O2	C18:4n-1,3,6,9	276.209	-	-
						C22H39ON2	C18H28O2	C18:4n-3,5,7,9	276.209	-	-
						C22H39ON2	C18H28O2	Cis-Parinaric Acid	276.209	-	18427-44-6
						C22H39ON2	C18H28O2	Tra C18:4n-3,6,9,15	276.209	-	-
						C22H39ON2	C18H28O2	Stearidonic Acid	276.209	C16300	20290-75-9
195	18.6878	1095.62	299.306	303.331	99604.8	C18H39ON2	C14H28O2	(+)-Isomyristic acid	228.209	-	2724-57-4
						C18H39ON2	C14H28O2	11-Methyl-tridecanoic acid	228.209	-	-
						C18H39ON2	C14H28O2	2,4,6,8-Tetramethyl-decanoic acid	228.209	-	-
						C18H39ON2	C14H28O2	2,4-Dimethyl-dodecanoic acid	228.209	-	-
						C18H39ON2	C14H28O2	2,5-Dimethyl-dodecanoic acid	228.209	-	-
						C18H39ON2	C14H28O2	2,6,10-Trimethyl-undecanoic acid	228.209	-	-
						C18H39ON2	C14H28O2	2,6-Dimethyl-dodecanoic acid	228.209	-	-
						C18H39ON2	C14H28O2	2-Ethyl-dodecanoic acid	228.209	-	-
						C18H39ON2	C14H28O2	2-Methyl-tridecanoic acid	228.209	-	24323-31-7
						C18H39ON2	C14H28O2	3,5-Dimethyldodecanoic acid	228.209	-	-
						C18H39ON2	C14H28O2	3-Methyl-tridecanoic acid	228.209	-	-
						C18H39ON2	C14H28O2	3R,5S-Dimethyldodecanoic acid	228.209	-	-
						C18H39ON2	C14H28O2	4,8-Dimethyl-dodecanoic acid	228.209	-	-
						C18H39ON2	C14H28O2	4-Methyl-tridecanoic acid	228.209	-	-
						C18H39ON2	C14H28O2	6-Ethyl-dodecanoic acid	228.209	-	-
						C18H39ON2	C14H28O2	9-Methyl-tridecanoic acid	228.209	-	-
						C18H39ON2	C14H28O2	Myristic acid	228.209	C06424	544-63-8
196	18.7596	1098.21	441.347	445.372	138144	C28H45O2N2	C24H34O3	(20S,22E)-3β-Hydroxychola-5,16,22-trien-24-oic Acid	370.251	-	-
						C28H45O2N2	C24H34O3	(22E)-3β-Hydroxychola-5,16,22-trien-24-oic Acid	370.251	-	-
						C28H45O2N2	C24H34O3	3-Oxo-4,6-choladienoic acid	370.251	-	-
						C28H45O2N2	C24H34O3	3-Oxo-5β-chola-7,11-dien-24-oic Acid	370.251	-	-
						C28H45O2N2	C24H34O3	3-Oxo-5β-chola-7,9(11)-dien-24-oic Acid	370.251	-	-
						C28H45O2N2	C24H34O3	3-Oxo-5β-chola-8(14),11-dien-24-oic Acid	370.251	-	-
						C28H45O2N2	C24H34O3	3-Oxochola-1,4-dien-24-oic Acid	370.251	-	-
						C28H45O2N2	C24H34O3	3-Oxochola-4,6-dien-24-oic Acid	370.251	-	-
197	18.8384	1101.88	329.28	333.305	154049	C18H37O3N2	C14H26O4	2-Methyl-tridecanedioic acid	258.183	-	-
						C18H37O3N2	C14H26O4	3-Methyl-tridecanedioic acid	258.183	-	-
						C18H37O3N2	C14H26O4	4-Methyl-tridecanedioic acid	258.183	-	-
						C18H37O3N2	C14H26O4	Tetradecanedioic acid	258.183	-	821-38-5
198	18.8811	1104.44	433.342	437.367	192985	C26H45O3N2	C22H34O4	(±)19,20-DiHDPA	362.246	-	-
						C26H45O3N2	C22H34O4	(Z)-2,4-Dihydroxy-6-(8-pentadecenyl)benzoic acid	362.246	-	62071-06-1
						C26H45O3N2	C22H34O4	10,11-DiHDPE	362.246	-	-
						C26H45O3N2	C22H34O4	13,14-DiHDPE	362.246	-	-
						C26H45O3N2	C22H34O4	16,16-Dimethyl-PGA2	362.246	-	41691-92-3
						C26H45O3N2	C22H34O4	16,17-DiHDPE	362.246	-	-
						C26H45O3N2	C22H34O4	19,20-DiHDPA	362.246	-	-
						C26H45O3N2	C22H34O4	1a,1b-Dihomo-15-deoxy-δ-12,14-PGD2	362.246	-	-
						C26H45O3N2	C22H34O4	1a,1b-Dihomo-PGJ2	362.246	-	-
						C26H45O3N2	C22H34O4	7(S),17(S)-Dihydroxy-8(E),10(Z),13(Z),15(E),19(Z)-Docosapentaenoic Acid	362.246	-	887752-13-8
						C26H45O3N2	C22H34O4	7,8-DiHDPE	362.246	-	-
199	19.0436	1112.46	327.301	331.326	106263	C19H39O2N2	C15H28O3	11-Keto pentadecanoic acid	256.204	-	-
						C19H39O2N2	C15H28O3	14-Keto pentadecanoic acid	256.204	-	-
						C19H39O2N2	C15H28O3	2-Oxo-pentadecanoic acid	256.204	-	-
						C19H39O2N2	C15H28O3	3-Oxo-pentadecanoic acid	256.204	-	-
						C19H39O2N2	C15H28O3	4-Keto pentadecanoic acid	256.204	-	-
						C19H39O2N2	C15H28O3	Lyngbic acid	256.204	-	-
200	19.0547	1113.47	269.259	273.284	294939	C16H33ON2	C12H22O2	10-Lauroleic acid	198.162	-	-
						C16H33ON2	C12H22O2	10Z-Dodecenoic acid	198.162	-	-
						C16H33ON2	C12H22O2	11-Lauroleic acid	198.162	-	-
						C16H33ON2	C12H22O2	2-Lauroleic acid	198.162	-	-
						C16H33ON2	C12H22O2	2Z-Dodecenoic acid	198.162	-	-
						C16H33ON2	C12H22O2	5-Methyl-2-undecenoic acid	198.162	-	-
						C16H33ON2	C12H22O2	6-Lauroleic acid	198.162	-	-
						C16H33ON2	C12H22O2	6Z-Dodecenoic acid	198.162	-	-
						C16H33ON2	C12H22O2	7-Lauroleic acid	198.162	-	-
						C16H33ON2	C12H22O2	7Z-Dodecenoic acid	198.162	-	-
						C16H33ON2	C12H22O2	9-Lauroleic acid	198.162	-	-
						C16H33ON2	C12H22O2	9Z-Dodecenoic acid	198.162	-	-
						C16H33ON2	C12H22O2	C12:1n-10	198.162	-	-
						C16H33ON2	C12H22O2	C12:1n-2	198.162	-	-
						C16H33ON2	C12H22O2	C12:1n-3	198.162	-	-
						C16H33ON2	C12H22O2	C12:1n-5	198.162	-	-
						C16H33ON2	C12H22O2	C12:1n-6	198.162	-	-
						C16H33ON2	C12H22O2	C12:1n-7	198.162	-	-
						C16H33ON2	C12H22O2	Cis-5-Dodecenoic acid	198.162	-	2430-94-6
						C16H33ON2	C12H22O2	Cis-dodec-3-Enoic acid	198.162	-	-
						C16H33ON2	C12H22O2	Linderic acid	198.162	-	-
						C16H33ON2	C12H22O2	Trans-dodec-3-Enoic acid	198.162	-	-
201	19.1023	1115.54	343.332	347.357	787776	C20H43O2N2	C16H32O3	Hexadecanoic acid, 14-hydroxy-, L-	272.235	-	-
						C20H43O2N2	C16H32O3	Jalapinolic acid	272.235	-	-
						C20H43O2N2	C16H32O3	(+)-15S-Hydroxy-hexadecanoic acid	272.235	-	-
						C20H43O2N2	C16H32O3	11-Hydroxy palmitic acid	272.235	-	-
						C20H43O2N2	C16H32O3	11S-Hydroxy-hexadecanoic acid	272.235	-	-
						C20H43O2N2	C16H32O3	14-Hydroxy palmitic acid	272.235	-	-
						C20H43O2N2	C16H32O3	14S-Hydroxy-hexadecanoic acid	272.235	-	-
						C20H43O2N2	C16H32O3	15-Hydroxy-hexadecanoic acid	272.235	-	-
						C20H43O2N2	C16H32O3	16-Hydroxy hexadecanoic acid	272.235	C18218	506-13-8
						C20H43O2N2	C16H32O3	2-Hydroxy palmitic acid	272.235	-	-
						C20H43O2N2	C16H32O3	3-Hydroxy-hexadecanoic acid	272.235	-	928-17-6
						C20H43O2N2	C16H32O3	3R-Hydroxypalmitic acid	272.235	-	-
						C20H43O2N2	C16H32O3	3S-Hydroxypalmitic acid	272.235	-	-
						C20H43O2N2	C16H32O3	4-Hydroxy palmitic acid	272.235	-	-
						C20H43O2N2	C16H32O3	5-Hydroxy-hexadecanoic acid	272.235	-	-
						C20H43O2N2	C16H32O3	5R-Hydroxy-hexadecanoic acid	272.235	-	-
						C20H43O2N2	C16H32O3	5S-Hydroxy-hexadecanoic acid	272.235	-	-
						C20H43O2N2	C16H32O3	7R-Hydroxy-hexadecanoic acid	272.235	-	-
						C20H43O2N2	C16H32O3	8S-Hydroxy-hexadecanoic acid	272.235	-	-
						C20H43O2N2	C16H32O3	9-Methoxy-pentadecanoic acid	272.235	-	-
						C20H43O2N2	C16H32O3	Hexadecanoic acid, 15-hydroxy-, L-	272.235	-	-
202	19.1178	1117.08	299.27	303.295	83914	C17H35O2N2	C13H24O3	10-Keto tridecanoic acid	228.173	-	-
						C17H35O2N2	C13H24O3	11-Hydroxy-9-tridecenoic acid	228.173	-	105798-56-9
						C17H35O2N2	C13H24O3	12-Keto tridecanoic acid	228.173	-	-
						C17H35O2N2	C13H24O3	2-Keto tridecanoic acid	228.173	-	-
						C17H35O2N2	C13H24O3	3-Oxo-tridecanoic acid	228.173	-	-
						C17H35O2N2	C13H24O3	7-Methoxy-dodec-4-enoic acid	228.173	-	-
203	19.1454	1118.5	315.301	319.326	82270.5	C18H39O2N2	C14H28O3	10-Hydroxy-tetradecanoic acid	244.204	-	-
						C18H39O2N2	C14H28O3	11-Hydroxy-tetradecanoic acid	244.204	-	-
						C18H39O2N2	C14H28O3	2-Hydroxymyristic Acid	244.204	-	2507-55-3
						C18H39O2N2	C14H28O3	3-Hydroxy-tetradecanoic acid	244.204	-	3422-31-9
						C18H39O2N2	C14H28O3	5-Hydroxy-tetradecanoic acid	244.204	-	-
						C18H39O2N2	C14H28O3	6-Hydroxy-tetradecanoic acid	244.204	-	-
						C18H39O2N2	C14H28O3	7-Hydroxytetradecanoic acid	244.204	-	-
						C18H39O2N2	C14H28O3	Omega-hydroxy myristic acid	244.204	-	-
						C18H39O2N2	C14H28O3	α-Hydroxy myristic acid	244.204	C13790	-
204	19.1993	1121.98	383.327	387.352	90076	C22H43O3N2	C18H32O4	10-Oxo-13-hydroxy-11-octadecenoic acid	312.23	-	-
						C22H43O3N2	C18H32O4	12-Oxo,13-hydroxy-9Z-octadecenoic acid	312.23	-	-
						C22H43O3N2	C18H32O4	12-Oxo-13-hydroxy-9-octadecenoic acid	312.23	-	-
						C22H43O3N2	C18H32O4	5S,8R-DiHODE	312.23	-	-
						C22H43O3N2	C18H32O4	7S,8S-DiHODE	312.23	-	-
						C22H43O3N2	C18H32O4	8,13-DiHODE	312.23	-	-
						C22H43O3N2	C18H32O4	8,13-Dihydroxy-9,11-octadecadienoic acid	312.23	C14831	-
						C22H43O3N2	C18H32O4	8R,11S-DiHODE	312.23	-	-
						C22H43O3N2	C18H32O4	9,10-Dioxo-octadecanoic acid	312.23	-	-
						C22H43O3N2	C18H32O4	9,14-DiHODE	312.23	-	-
						C22H43O3N2	C18H32O4	9,14-Dihydroxy-10,12-octadecadienoic acid	312.23	C07338	-
						C22H43O3N2	C18H32O4	9-Hydroxy-10-oxo-12(Z)-octadecenoic acid	312.23	C19618	-
						C22H43O3N2	C18H32O4	9-Hydroxy-10-oxo-12-octadecenoic acid	312.23	-	-
						C22H43O3N2	C18H32O4	9-Hydroxy-12-oxo-10-octadecenoic acid	312.23	-	-
						C22H43O3N2	C18H32O4	9-Hydroxy-13-oxo-10-octadecenoic acid	312.23	-	-
						C22H43O3N2	C18H32O4	9-Oxo-13-hydroxy-11-octadecenoic acid	312.23	-	-
						C22H43O3N2	C18H32O4	α-12,13-DiHODE	312.23	C04717	33964-75-9
						C22H43O3N2	C18H32O4	α-15,16-DiHODE	312.23	-	-
						C22H43O3N2	C18H32O4	α-9,10-DiHODE	312.23	C14827	29774-12-7
						C22H43O3N2	C18H32O4	γ- 12,13-DiHODE	312.23	-	-
						C22H43O3N2	C18H32O4	γ- 6,7-DiHODE	312.23	-	-
						C22H43O3N2	C18H32O4	γ- 9,10-DiHODE	312.23	-	-
205	19.3418	1129.17	295.274	299.299	76245.8	C18H35ON2	C14H24O2	10Z,12E-Tetradecadienoic acid	224.178	-	-
						C18H35ON2	C14H24O2	14:2(6,9)	224.178	-	-
						C18H35ON2	C14H24O2	2E,4E-Tetradecadienoic acid	224.178	-	-
						C18H35ON2	C14H24O2	3,4-Tetradecadienoic acid	224.178	-	-
						C18H35ON2	C14H24O2	3E,5Z-Tetradecadienoic acid	224.178	-	-
						C18H35ON2	C14H24O2	3Z,5E-Tetradecadienoic acid	224.178	-	-
						C18H35ON2	C14H24O2	3Z,5Z-Tetradecadienoic acid	224.178	-	-
						C18H35ON2	C14H24O2	5,8-Tetradecadienoic acid	224.178	-	-
						C18H35ON2	C14H24O2	5Z,8Z-Tetradecadienoic acid	224.178	-	-
						C18H35ON2	C14H24O2	Alepric acid	224.178	-	-
						C18H35ON2	C14H24O2	C14:2n-10,11	224.178	-	-
						C18H35ON2	C14H24O2	C14:2n-10,12	224.178	-	-
						C18H35ON2	C14H24O2	C14:2n-2,4	224.178	-	-
						C18H35ON2	C14H24O2	Goshuyic acid	224.178	-	39039-37-7
206	19.3873	1131.39	407.328	411.352	139775	C24H43O3N2	C20H32O4	(14S)-14,15-Dihydroxy-8(17),13(16)-labdadien-19-oic acid	336.23	-	-
						C24H43O3N2	C20H32O4	10,11-Dihydro-12-oxo-LTB4	336.23	-	-
						C24H43O3N2	C20H32O4	11H-14,15-EETA	336.23	-	219535-29-2
						C24H43O3N2	C20H32O4	12(S)-HPETE	336.23	-	71774-10-2
						C24H43O3N2	C20H32O4	12(S)-Leukotriene B4	336.23	-	83709-73-3
						C24H43O3N2	C20H32O4	12,20-DiHETE	336.23	-	-
						C24H43O3N2	C20H32O4	14,15-DiHETE	336.23	-	-
						C24H43O3N2	C20H32O4	15(S)-HPETE	336.23	-	70981-96-3
						C24H43O3N2	C20H32O4	15H-11,12-EETA	336.23	-	877878-78-9
						C24H43O3N2	C20H32O4	17,18-DiHETE	336.23	-	-
						C24H43O3N2	C20H32O4	5,15-DiHETE	336.23	-	82200-87-1
						C24H43O3N2	C20H32O4	6,7-Dihydro-5-oxo-12-epi-LTB4	336.23	-	-
						C24H43O3N2	C20H32O4	6-Trans-12-epi-Leukotriene B4	336.23	-	71548-19-1
						C24H43O3N2	C20H32O4	6-Trans-Leukotriene B4	336.23	-	71652-82-9
						C24H43O3N2	C20H32O4	8,15-DiHETE	336.23	-	77667-08-4
						C24H43O3N2	C20H32O4	8-Iso-PGA1	336.23	-	-
						C24H43O3N2	C20H32O4	9-Deoxy-delta12-PGD2	336.23	-	-
						C24H43O3N2	C20H32O4	Ent-1(10)-Halimene-15,19-dioic acid	336.23	-	-
						C24H43O3N2	C20H32O4	Hepoxilin A3	336.23	-	85589-24-8
						C24H43O3N2	C20H32O4	Hepoxilin B3	336.23	-	-
						C24H43O3N2	C20H32O4	Leukotriene B4	336.23	-	71160-24-2
						C24H43O3N2	C20H32O4	Prostaglandin A1	336.23	-	14152-28-4
						C24H43O3N2	C20H32O4	Prostaglandin B1	336.23	-	13345-51-2
						C24H43O3N2	C20H32O4	Prostaglandin C1	336.23	-	-
207	19.5037	1135.72	343.332	347.357	363032	C20H43O2N2	C16H32O3	Hexadecanoic acid, 14-hydroxy-, L-	272.235	-	-
						C20H43O2N2	C16H32O3	Jalapinolic acid	272.235	-	-
						C20H43O2N2	C16H32O3	(+)-15S-Hydroxy-hexadecanoic acid	272.235	-	-
						C20H43O2N2	C16H32O3	11-Hydroxy palmitic acid	272.235	-	-
						C20H43O2N2	C16H32O3	11S-Hydroxy-hexadecanoic acid	272.235	-	-
						C20H43O2N2	C16H32O3	14-Hydroxy palmitic acid	272.235	-	-
						C20H43O2N2	C16H32O3	14S-Hydroxy-hexadecanoic acid	272.235	-	-
						C20H43O2N2	C16H32O3	15-Hydroxy-hexadecanoic acid	272.235	-	-
						C20H43O2N2	C16H32O3	16-Hydroxy hexadecanoic acid	272.235	C18218	506-13-8
						C20H43O2N2	C16H32O3	2-Hydroxy palmitic acid	272.235	-	-
						C20H43O2N2	C16H32O3	3-Hydroxy-hexadecanoic acid	272.235	-	928-17-6
						C20H43O2N2	C16H32O3	3R-Hydroxypalmitic acid	272.235	-	-
						C20H43O2N2	C16H32O3	3S-Hydroxypalmitic acid	272.235	-	-
						C20H43O2N2	C16H32O3	4-Hydroxy palmitic acid	272.235	-	-
						C20H43O2N2	C16H32O3	5-Hydroxy-hexadecanoic acid	272.235	-	-
						C20H43O2N2	C16H32O3	5R-Hydroxy-hexadecanoic acid	272.235	-	-
						C20H43O2N2	C16H32O3	5S-Hydroxy-hexadecanoic acid	272.235	-	-
						C20H43O2N2	C16H32O3	7R-Hydroxy-hexadecanoic acid	272.235	-	-
						C20H43O2N2	C16H32O3	8S-Hydroxy-hexadecanoic acid	272.235	-	-
						C20H43O2N2	C16H32O3	9-Methoxy-pentadecanoic acid	272.235	-	-
						C20H43O2N2	C16H32O3	Hexadecanoic acid, 15-hydroxy-, L-	272.235	-	-
208	19.517	1135.91	323.269	327.294	84539.4	C19H35O2N2	C15H24O3	Juvenile hormone III acid	252.173	C16504	-
209	19.4969	1137.47	349.321	353.346	328123	C22H41ON2	C18H30O2	Calendic acid	278.225	-	28872-28-8
						C22H41ON2	C18H30O2	Gamma-Linolenic acid	278.225	-	506-26-3
						C22H41ON2	C18H30O2	Linolenelaidic acid	278.225	-	28290-79-1
						C22H41ON2	C18H30O2	Alpha-Linolenic acid	278.225	-	463-40-1
210	19.4999	1137.58	387.359	391.383	67967.9	C22H47O3N2	C18H36O4	(9S,10S)-9,10-Dihydroxyoctadecanoic acid	316.261	C15988	-
						C22H47O3N2	C18H36O4	10,11-Dihydroxy stearic acid	316.261	-	-
						C22H47O3N2	C18H36O4	11,12-Dihydroxy stearic acid	316.261	-	-
						C22H47O3N2	C18H36O4	12,13-Dihydroxy stearic acid	316.261	-	-
						C22H47O3N2	C18H36O4	15,16-Dihydroxy-octadecanoic acid	316.261	-	-
						C22H47O3N2	C18H36O4	2,3-Dihydroxy stearic acid	316.261	-	-
						C22H47O3N2	C18H36O4	4,14-Dihydroxy-octadecanoic acid	316.261	-	-
						C22H47O3N2	C18H36O4	5,6-Dihydroxy stearic acid	316.261	-	-
						C22H47O3N2	C18H36O4	6,7-Dihydroxy stearic acid	316.261	-	-
						C22H47O3N2	C18H36O4	7,8-Dihydroxy stearic acid	316.261	-	-
						C22H47O3N2	C18H36O4	8,9-Dihydroxy stearic acid	316.261	-	-
						C22H47O3N2	C18H36O4	9,10-Dihydroxy stearic acid	316.261	C19622	-
						C22H47O3N2	C18H36O4	9,12-Dihydroxy stearic acid	316.261	-	-
						C22H47O3N2	C18H36O4	9,14-Dihydroxy-octadecanoic acid	316.261	-	-
211	19.5201	1138.82	503.421	507.446	133662	C31H55O3N2	C27H44O4	3-Oxo-7α-Hydroxy-5α-cholestan-26-oic acid	432.324	-	-
						C31H55O3N2	C27H44O4	3α,12α-Dihydroxy-5β-cholest-24-en-26-oic acid	432.324	-	-
						C31H55O3N2	C27H44O4	3α,7α-Dihydroxy-5β-cholest-23-en-26-oic acid	432.324	-	-
						C31H55O3N2	C27H44O4	3α,7α-Dihydroxy-5β-cholest-24-en-26-oic acid	432.324	-	-
						C31H55O3N2	C27H44O4	3α,7β-Dihydroxy-5β-cholest-24-en-26-oic acid	432.324	-	-
						C31H55O3N2	C27H44O4	3β,7α-Dihydroxy-5-cholestenoate	432.324	C17355	115538-84-6
						C31H55O3N2	C27H44O4	3β,7α-Dihydroxycholest-5-en-27-oic acid	432.324	-	-
212	19.6045	1141.53	449.338	453.362	140834	C26H45O4N2	C22H34O5	8-Iso-16-cyclohexyl-tetranor Prostaglandin E2	378.241	-	53319-30-5
						C26H45O4N2	C22H34O5	C22-PGF4alpha	378.241	-	-
						C26H45O4N2	C22H34O5	F4-Neuroprostane (7-series)	378.241	C13819	-
213	19.6394	1145.07	363.264	367.289	121688	C21H35O3N2	C17H24O4	Acetylvalerenolic acid	292.168	-	81397-67-3
214	19.7157	1148.74	381.311	385.336	105690	C22H41O3N2	C18H30O4	(9Z,11R,12S,13S,15Z)-12,13-Epoxy-11-hydroxy-9,15-octadecadienoic acid	310.214	-	106034-49-5
						C22H41O3N2	C18H30O4	12-HpOTrE	310.214	-	-
						C22H41O3N2	C18H30O4	12-Hydroperoxy-9Z,13E,15-octadecatrienoic acid	310.214	-	-
						C22H41O3N2	C18H30O4	13-HpOTrE	310.214	-	-
						C22H41O3N2	C18H30O4	13-Hydroperoxy-9,11E,15Z-octadecatrienoic acid	310.214	-	-
						C22H41O3N2	C18H30O4	13S-HpOTrE	310.214	C04785	-
						C22H41O3N2	C18H30O4	13S-HpOTrE(gamma)	310.214	-	121107-97-9
						C22H41O3N2	C18H30O4	15,16-Epoxy-13-OH-9Z,11E-octadecadienoic acid	310.214	-	-
						C22H41O3N2	C18H30O4	16-HpOTrE	310.214	-	-
						C22H41O3N2	C18H30O4	16-Hydroperoxy-9Z,12,14E-octadecatrienoic acid	310.214	-	-
						C22H41O3N2	C18H30O4	2(R)-HPOT	310.214	C16341	-
						C22H41O3N2	C18H30O4	7S,8S-DiHOTrE	310.214	C07357	-
						C22H41O3N2	C18H30O4	9(S)-HpOTrE	310.214	C16321	111004-08-1
						C22H41O3N2	C18H30O4	9,10-Epoxy-13-oxo-11-octadecenoic acid	310.214	-	-
						C22H41O3N2	C18H30O4	9H-12(13)-EpODE	310.214	-	-
						C22H41O3N2	C18H30O4	9-HpOTrE	310.214	-	-
						C22H41O3N2	C18H30O4	9-Hydroperoxy-10E,12,15Z-octadecatrienoic acid	310.214	-	-
						C22H41O3N2	C18H30O4	9-Oxo-12,13-epoxy-10-octadecenoic acid	310.214	-	-
						C22H41O3N2	C18H30O4	9S-Hydroxy-10S,11S-epoxy-12Z,15Z-octadecadienoic acid	310.214	-	-
						C22H41O3N2	C18H30O4	9S-Hydroxy-12R,13S-epoxy-10E,15Z-octadecadienoic acid	310.214	-	-
						C22H41O3N2	C18H30O4	Auxin b	310.214	-	-
						C22H41O3N2	C18H30O4	Trans-EKODE-(E)-Ib	310.214	-	478931-82-7
215	19.7727	1151.37	341.316	345.341	1.10671e+06	C20H41O2N2	C16H30O3	(+)-12-Hydroxy-9Z-hexadecenoic acid	270.219	-	-
						C20H41O2N2	C16H30O3	10-Keto palmitic acid	270.219	-	-
						C20H41O2N2	C16H30O3	10-Oxo-14-methyl-pentadecanoic acid	270.219	-	-
						C20H41O2N2	C16H30O3	11-Keto palmitic acid	270.219	-	-
						C20H41O2N2	C16H30O3	15-Oxo-hexadecanoic acid	270.219	-	-
						C20H41O2N2	C16H30O3	16-Hydroxy-5-hexadecenoic acid	270.219	-	-
						C20H41O2N2	C16H30O3	16-Hydroxy-6-hexadecenoic acid	270.219	-	-
						C20H41O2N2	C16H30O3	16-Hydroxy-9E-hexadecenoic acid	270.219	-	-
						C20H41O2N2	C16H30O3	16-Hydroxy-9Z-hexadecenoic acid	270.219	-	-
						C20H41O2N2	C16H30O3	16-Oxo-palmitate	270.219	C19614	-
						C20H41O2N2	C16H30O3	2-Keto palmitic acid	270.219	-	-
						C20H41O2N2	C16H30O3	3-Keto palmitic acid	270.219	-	-
						C20H41O2N2	C16H30O3	4-Keto palmitic acid	270.219	-	-
						C20H41O2N2	C16H30O3	5-Keto palmitic acid	270.219	-	-
						C20H41O2N2	C16H30O3	7-Keto palmitic acid	270.219	-	-
						C20H41O2N2	C16H30O3	8-Keto palmitic acid	270.219	-	-
						C20H41O2N2	C16H30O3	9-Hexadecenoic acid, 12-hydroxy-, (Z)-(+)-	270.219	-	-
						C20H41O2N2	C16H30O3	9-Keto palmitic acid	270.219	-	-
						C20H41O2N2	C16H30O3	Ambrettolic acid	270.219	-	-
						C20H41O2N2	C16H30O3	Delta5-Isoambrettolic acid	270.219	-	-
						C20H41O2N2	C16H30O3	Delta6-Isoambrettolic acid	270.219	-	-
216	19.8475	1154.4	305.259	309.284	99019.7	C19H33ON2	C15H22O2	(Z)-Alpha-Bergamotenoic acid	234.162	-	124439-27-6
						C19H33ON2	C15H22O2	Beta-Costic acid	234.162	-	3650-43-9
						C19H33ON2	C15H22O2	Beta-Santalic acid	234.162	-	73590-17-7
						C19H33ON2	C15H22O2	Germacrene A acid	234.162	C19678	-
						C19H33ON2	C15H22O2	Macrophyllic acid A	234.162	-	-
						C19H33ON2	C15H22O2	Sclerosporin	234.162	C09721	66419-03-2
						C19H33ON2	C15H22O2	Valerenic acid	234.162	C09743	-
217	19.8093	1154.5	315.264	319.289	57331	C17H35O3N2	C13H24O4	1,11-Undecanedicarboxylic acid	244.167	-	505-52-2
						C17H35O3N2	C13H24O4	2-Methyl-dodecanedioic acid	244.167	-	-
						C17H35O3N2	C13H24O4	3-Methyl-dodecanedioic acid	244.167	-	-
						C17H35O3N2	C13H24O4	4-Methyl-dodecanedioic acid	244.167	-	-
						C17H35O3N2	C13H24O4	6-Methyl-dodecanedioic acid	244.167	-	-
218	19.8414	1155.22	505.436	509.461	136930	C31H57O3N2	C27H46O4	3a,7a-Dihydroxycoprostanic acid	434.34	-	-
						C31H57O3N2	C27H46O4	3α,12α-Dihydroxy-5β-cholestan-26-oic acid	434.34	-	-
						C31H57O3N2	C27H46O4	3α,7α-Dihydroxy-5α-cholestan-26-oic acid	434.34	-	-
						C31H57O3N2	C27H46O4	3α,7α-Dihydroxy-5β-cholestan-26-oic acid	434.34	-	-
						C31H57O3N2	C27H46O4	3α,7β-Dihydroxy-5β-cholestan-26-oic acid	434.34	-	-
						C31H57O3N2	C27H46O4	3β,12α-Dihydroxy-5β-cholestan-26-oic acid	434.34	-	-
						C31H57O3N2	C27H46O4	3β,7α-Dihydroxy-5α-cholestan-26-oic acid	434.34	-	-
						C31H57O3N2	C27H46O4	3β,7β-Dihydroxy-5β-cholestan-26-oic acid	434.34	-	-
						C31H57O3N2	C27H46O4	Dihydroxycholestanoic acid	434.34	-	-
219	19.8796	1158.04	313.285	317.31	133009	C18H37O2N2	C14H26O3	10-Keto myristic acid	242.188	-	-
						C18H37O2N2	C14H26O3	12-Hydroxy-13-tetradecenoic acid	242.188	-	-
						C18H37O2N2	C14H26O3	12-Methyl-10-oxo-tridecanoic acid	242.188	-	-
						C18H37O2N2	C14H26O3	13-Keto myristic acid	242.188	-	-
						C18H37O2N2	C14H26O3	14-Hydroxy-12-tetradecenoic acid	242.188	-	-
						C18H37O2N2	C14H26O3	14-Hydroxy-5Z-tetradecenoic acid	242.188	-	-
						C18H37O2N2	C14H26O3	2-Oxo-tetradecanoic acid	242.188	-	-
						C18H37O2N2	C14H26O3	3-Oxo-tetradecanoic acid	242.188	-	-
						C18H37O2N2	C14H26O3	4-Keto myristic acid	242.188	-	-
						C18H37O2N2	C14H26O3	6-Oxo-tetradecanoic acid	242.188	-	-
						C18H37O2N2	C14H26O3	7-Oxotetradecanoic acid	242.188	-	-
						C18H37O2N2	C14H26O3	14-Hydroxy-12Z-tetradecenoic acid	242.188	-	-
220	19.9176	1160.05	387.358	391.383	208527	C22H47O3N2	C18H36O4	(9S,10S)-9,10-Dihydroxyoctadecanoic acid	316.261	C15988	-
						C22H47O3N2	C18H36O4	10,11-Dihydroxy stearic acid	316.261	-	-
						C22H47O3N2	C18H36O4	11,12-Dihydroxy stearic acid	316.261	-	-
						C22H47O3N2	C18H36O4	12,13-Dihydroxy stearic acid	316.261	-	-
						C22H47O3N2	C18H36O4	15,16-Dihydroxy-octadecanoic acid	316.261	-	-
						C22H47O3N2	C18H36O4	2,3-Dihydroxy stearic acid	316.261	-	-
						C22H47O3N2	C18H36O4	4,14-Dihydroxy-octadecanoic acid	316.261	-	-
						C22H47O3N2	C18H36O4	5,6-Dihydroxy stearic acid	316.261	-	-
						C22H47O3N2	C18H36O4	6,7-Dihydroxy stearic acid	316.261	-	-
						C22H47O3N2	C18H36O4	7,8-Dihydroxy stearic acid	316.261	-	-
						C22H47O3N2	C18H36O4	8,9-Dihydroxy stearic acid	316.261	-	-
						C22H47O3N2	C18H36O4	9,10-Dihydroxy stearic acid	316.261	C19622	-
						C22H47O3N2	C18H36O4	9,12-Dihydroxy stearic acid	316.261	-	-
						C22H47O3N2	C18H36O4	9,14-Dihydroxy-octadecanoic acid	316.261	-	-
221	19.9357	1160.19	521.431	525.456	116293	C31H57O4N2	C27H46O5	3a,7a,12a-Trihydroxy-5b-cholestanoic acid	450.334	-	33964-75-9
						C31H57O4N2	C27H46O5	3Alpha,7Alpha,12Alpha-Trihydroxy-5Beta-cholestan-26-oic acid	450.334	-
						C31H57O4N2	C27H46O5	Coprocholic acid	450.334	C04722	547-98-8
222	20.047	1167.34	533.395	537.42	97177.3	C32H49ON6	C27H42O6	Lucidenic acid M	462.298	-	110241-33-3
223	20.1137	1170.72	309.254	313.279	125672	C18H33O2N2	C14H22O3	(9R,13R)-1a,1b-Dihomo-jasmonic acid	238.157	-	-
						C18H33O2N2	C14H22O3	(9S,13S)-1a,1b-Dihomo-jasmonic acid	238.157	-	-
						C18H33O2N2	C14H22O3	7-Oxo-11E,13-Tetradecadienoic acid	238.157	-	-
224	20.1595	1173.19	315.264	319.289	562736	C17H35O3N2	C13H24O4	1,11-Undecanedicarboxylic acid	244.167	-	505-52-2
						C17H35O3N2	C13H24O4	2-Methyl-dodecanedioic acid	244.167	-	-
						C17H35O3N2	C13H24O4	3-Methyl-dodecanedioic acid	244.167	-	-
						C17H35O3N2	C13H24O4	4-Methyl-dodecanedioic acid	244.167	-	-
						C17H35O3N2	C13H24O4	6-Methyl-dodecanedioic acid	244.167	-	-
225	20.2013	1174.89	295.275	299.3	157477	C18H35ON2	C14H24O2	10Z,12E-Tetradecadienoic acid	224.178	-	-
						C18H35ON2	C14H24O2	14:2(6,9)	224.178	-	-
						C18H35ON2	C14H24O2	2E,4E-Tetradecadienoic acid	224.178	-	-
						C18H35ON2	C14H24O2	3,4-Tetradecadienoic acid	224.178	-	-
						C18H35ON2	C14H24O2	3E,5Z-Tetradecadienoic acid	224.178	-	-
						C18H35ON2	C14H24O2	3Z,5E-Tetradecadienoic acid	224.178	-	-
						C18H35ON2	C14H24O2	3Z,5Z-Tetradecadienoic acid	224.178	-	-
						C18H35ON2	C14H24O2	5,8-Tetradecadienoic acid	224.178	-	-
						C18H35ON2	C14H24O2	5Z,8Z-Tetradecadienoic acid	224.178	-	-
						C18H35ON2	C14H24O2	Alepric acid	224.178	-	-
						C18H35ON2	C14H24O2	C14:2n-10,11	224.178	-	-
						C18H35ON2	C14H24O2	C14:2n-10,12	224.178	-	-
						C18H35ON2	C14H24O2	C14:2n-2,4	224.178	-	-
						C18H35ON2	C14H24O2	Goshuyic acid	224.178	-	39039-37-7
226	20.2721	1178.96	315.301	319.326	75088.9	C18H39O2N2	C14H28O3	10-Hydroxy-tetradecanoic acid	244.204	-	-
						C18H39O2N2	C14H28O3	11-Hydroxy-tetradecanoic acid	244.204	-	-
						C18H39O2N2	C14H28O3	2-Hydroxymyristic Acid	244.204	-	2507-55-3
						C18H39O2N2	C14H28O3	3-Hydroxy-tetradecanoic acid	244.204	-	3422-31-9
						C18H39O2N2	C14H28O3	5-Hydroxy-tetradecanoic acid	244.204	-	-
						C18H39O2N2	C14H28O3	6-Hydroxy-tetradecanoic acid	244.204	-	-
						C18H39O2N2	C14H28O3	7-Hydroxytetradecanoic acid	244.204	-	-
						C18H39O2N2	C14H28O3	Omega-hydroxy myristic acid	244.204	-	-
						C18H39O2N2	C14H28O3	α-Hydroxy myristic acid	244.204	C13790	-
227	20.3927	1185.64	351.301	355.326	85134.3	C21H39O2N2	C17H28O3	12-Hydroxy-5,8,10-heptadecatrienoic acid	280.204	-	-
						C21H39O2N2	C17H28O3	12S-HHTrE	280.204	-	54397-84-1
						C21H39O2N2	C17H28O3	12S-Hydroxy-5Z,8E,10E-heptadecatrienoic acid	280.204	-	-
228	20.4771	1191.28	313.321	317.346	132340	C19H41ON2	C15H30O2	Pentadecylic acid	242.225	C16537	1002-84-2
229	20.5719	1195.38	341.316	345.341	639600	C20H41O2N2	C16H30O3	(+)-12-Hydroxy-9Z-hexadecenoic acid	270.219	-	-
						C20H41O2N2	C16H30O3	10-Keto palmitic acid	270.219	-	-
						C20H41O2N2	C16H30O3	10-Oxo-14-methyl-pentadecanoic acid	270.219	-	-
						C20H41O2N2	C16H30O3	11-Keto palmitic acid	270.219	-	-
						C20H41O2N2	C16H30O3	15-Oxo-hexadecanoic acid	270.219	-	-
						C20H41O2N2	C16H30O3	16-Hydroxy-5-hexadecenoic acid	270.219	-	-
						C20H41O2N2	C16H30O3	16-Hydroxy-6-hexadecenoic acid	270.219	-	-
						C20H41O2N2	C16H30O3	16-Hydroxy-9E-hexadecenoic acid	270.219	-	-
						C20H41O2N2	C16H30O3	16-Hydroxy-9Z-hexadecenoic acid	270.219	-	-
						C20H41O2N2	C16H30O3	16-Oxo-palmitate	270.219	C19614	-
						C20H41O2N2	C16H30O3	2-Keto palmitic acid	270.219	-	-
						C20H41O2N2	C16H30O3	3-Keto palmitic acid	270.219	-	-
						C20H41O2N2	C16H30O3	4-Keto palmitic acid	270.219	-	-
						C20H41O2N2	C16H30O3	5-Keto palmitic acid	270.219	-	-
						C20H41O2N2	C16H30O3	7-Keto palmitic acid	270.219	-	-
						C20H41O2N2	C16H30O3	8-Keto palmitic acid	270.219	-	-
						C20H41O2N2	C16H30O3	9-Hexadecenoic acid, 12-hydroxy-, (Z)-(+)-	270.219	-	-
						C20H41O2N2	C16H30O3	9-Keto palmitic acid	270.219	-	-
						C20H41O2N2	C16H30O3	Ambrettolic acid	270.219	-	-
						C20H41O2N2	C16H30O3	Delta5-Isoambrettolic acid	270.219	-	-
						C20H41O2N2	C16H30O3	Delta6-Isoambrettolic acid	270.219	-	-
230	20.6028	1196.16	421.306	425.331	1.5475e+06	C24H41O4N2	C20H30O5	10,11-Dihydro-12-oxo-Resolvin E1	350.209	-	-
						C24H41O4N2	C20H30O5	15-Dehydro-prostaglandin D2	350.209	C04758	-
						C24H41O4N2	C20H30O5	15-keto-PGE2	350.209	C04707	-
						C24H41O4N2	C20H30O5	15-Oxo-LXA4	350.209	-	-
						C24H41O4N2	C20H30O5	18S-Resolvin E1	350.209	-	-
						C24H41O4N2	C20H30O5	5,6,18-TriHEPE	350.209	-	-
						C24H41O4N2	C20H30O5	Lipoxin A5	350.209	-	110657-98-2
						C24H41O4N2	C20H30O5	PGE3	350.209	C06439	802-31-3
						C24H41O4N2	C20H30O5	PGI3	350.209	-	68324-96-9
						C24H41O4N2	C20H30O5	PGK2	350.209	-	275816-51-8
						C24H41O4N2	C20H30O5	Resolvin E1	350.209	-	-
						C24H41O4N2	C20H30O5	TXA3	350.209	-	-
						C24H41O4N2	C20H30O5	PGD3	350.209	C13802	71902-47-1
						C24H41O4N2	C20H30O5	15-Keto-Prostaglandin E2	350.209	-	26441-05-4
231	20.6274	1196.36	283.274	287.3	248229	C17H35ON2	C13H24O2	12-Tridecenoic acid	212.178	-	-
						C17H35ON2	C13H24O2	13:1(8)	212.178	-	-
						C17H35ON2	C13H24O2	2-Methyl-2-dodecenoic acid	212.178	-	-
						C17H35ON2	C13H24O2	2-Methylene dodecanoic acid	212.178	-	-
						C17H35ON2	C13H24O2	3-n-Decyl acrylic acid	212.178	-	-
						C17H35ON2	C13H24O2	7-Tridecenoic acid	212.178	-	-
						C17H35ON2	C13H24O2	7-Tridecenoic acid; C13:1n-6	212.178	-	-
						C17H35ON2	C13H24O2	C13:1n-1	212.178	-	-
						C17H35ON2	C13H24O2	Isotridecenoic acid	212.178	-	-
						C17H35ON2	C13H24O2	Trans-Δ2-11-Methyl-Dodecenoic Acid	212.178	C18206	677354-24-4
232	20.7501	1199.39	295.274	299.299	980041	C18H35ON2	C14H24O2	10Z,12E-Tetradecadienoic acid	224.178	-	-
						C18H35ON2	C14H24O2	14:2(6,9)	224.178	-	-
						C18H35ON2	C14H24O2	2E,4E-Tetradecadienoic acid	224.178	-	-
						C18H35ON2	C14H24O2	3,4-Tetradecadienoic acid	224.178	-	-
						C18H35ON2	C14H24O2	3E,5Z-Tetradecadienoic acid	224.178	-	-
						C18H35ON2	C14H24O2	3Z,5E-Tetradecadienoic acid	224.178	-	-
						C18H35ON2	C14H24O2	3Z,5Z-Tetradecadienoic acid	224.178	-	-
						C18H35ON2	C14H24O2	5,8-Tetradecadienoic acid	224.178	-	-
						C18H35ON2	C14H24O2	5Z,8Z-Tetradecadienoic acid	224.178	-	-
						C18H35ON2	C14H24O2	Alepric acid	224.178	-	-
						C18H35ON2	C14H24O2	C14:2n-10,11	224.178	-	-
						C18H35ON2	C14H24O2	C14:2n-10,12	224.178	-	-
						C18H35ON2	C14H24O2	C14:2n-2,4	224.178	-	-
						C18H35ON2	C14H24O2	Goshuyic acid	224.178	-	39039-37-7
233	20.6814	1201.46	367.332	371.357	959412	C22H43O2N2	C18H32O3	10-Keto-12Z-octadecenoic acid	296.235	-	-
						C22H43O2N2	C18H32O3	9(R)-HODE	296.235	-	10075-11-3
						C22H43O2N2	C18H32O3	9(S)-HODE	296.235	C14767	73543-67-6
						C22H43O2N2	C18H32O3	9-HODE	296.235	-	-
						C22H43O2N2	C18H32O3	(±)12(13)-EpOME	296.235	-	-
						C22H43O2N2	C18H32O3	(±)13-HODE	296.235	-	73804-64-5
						C22H43O2N2	C18H32O3	(±)9-HODE	296.235	-	98524-19-7
						C22H43O2N2	C18H32O3	(1R,2R)-3-Oxo-2-pentyl-cyclopentaneoctanoic acid	296.235	-	-
						C22H43O2N2	C18H32O3	(1S,2S)-3-Oxo-2-pentyl-cyclopentaneoctanoic acid	296.235	-	-
						C22H43O2N2	C18H32O3	(Z)-13-Oxo-9-octadecenoic acid	296.235	-	38205-11-7
						C22H43O2N2	C18H32O3	10R-HODE	296.235	-	-
						C22H43O2N2	C18H32O3	10S-HODE	296.235	-	-
						C22H43O2N2	C18H32O3	12(13)-EpOME	296.235	C14826	-
						C22H43O2N2	C18H32O3	12,13-EpOME(9)	296.235	-	-
						C22H43O2N2	C18H32O3	12,13-Epoxy-9-octadecenoic acid	296.235	-	-
						C22H43O2N2	C18H32O3	12-Hydroxy-8,10-octadecadienoic acid	296.235	-	170171-31-0
						C22H43O2N2	C18H32O3	12-Oxo-10E-octadecenoic acid	296.235	-	-
						C22H43O2N2	C18H32O3	12-Oxo-10Z-octadecenoic acid	296.235	-	-
						C22H43O2N2	C18H32O3	12-Oxo-9E-octadecenoic acid	296.235	-	-
						C22H43O2N2	C18H32O3	12-Oxo-9Z-octadecenoic acid	296.235	-	-
						C22H43O2N2	C18H32O3	12-OxoOME(10E)	296.235	-	-
						C22H43O2N2	C18H32O3	12-OxoOME(10Z)	296.235	-	-
						C22H43O2N2	C18H32O3	12-OxoOME(9E)	296.235	-	-
						C22H43O2N2	C18H32O3	12-OxoOME(9Z)	296.235	-	-
						C22H43O2N2	C18H32O3	12R,13S-Epoxy-9Z-octadecenoic acid	296.235	C08368	-
						C22H43O2N2	C18H32O3	12R-HODE	296.235	-	-
						C22H43O2N2	C18H32O3	12R-Hydroxy-9Z,15Z-octadecadienoic acid	296.235	-	-
						C22H43O2N2	C18H32O3	12S,13R-EpOME	296.235	C08368	503-07-1
						C22H43O2N2	C18H32O3	13(R)-HODE	296.235	-	10219-69-9
						C22H43O2N2	C18H32O3	13(S)-HODE	296.235	C14762	29623-28-7
						C22H43O2N2	C18H32O3	13R-Hydroxy-9E,11Z-octadecadienoic acid	296.235	-	-
						C22H43O2N2	C18H32O3	13S-Hydroxy-9E,11Z-octadecadienoic acid	296.235	-	-
						C22H43O2N2	C18H32O3	18-Oxooleate	296.235	C19617	-
						C22H43O2N2	C18H32O3	2R-Hydroxy-linoleic acid	296.235	-	-
						C22H43O2N2	C18H32O3	6-HODE	296.235	-	-
						C22H43O2N2	C18H32O3	6-Hydroxy-9Z,12Z-octadecadienoic acid	296.235	-	-
						C22H43O2N2	C18H32O3	7-Methoxy-9-methyl-hexadeca-4E,8E-dienoic acid	296.235	-	-
						C22H43O2N2	C18H32O3	8R-HODE	296.235	-	-
						C22H43O2N2	C18H32O3	8S-HODE	296.235	C08318	-
						C22H43O2N2	C18H32O3	9,10-EpOME(12)	296.235	-	-
						C22H43O2N2	C18H32O3	9,10-Epoxy-12-octadecenoic acid	296.235	-	-
						C22H43O2N2	C18H32O3	9R,10S-EpOME	296.235	C14825	-
						C22H43O2N2	C18H32O3	9S-Hydroxy-10E,12E-octadecadienoic acid	296.235	-	-
						C22H43O2N2	C18H32O3	Alpha-artemisic acid	296.235	-	-
						C22H43O2N2	C18H32O3	Avenoleic acid	296.235	-	-
						C22H43O2N2	C18H32O3	Beta-Dimorphecolic acid	296.235	-	-
						C22H43O2N2	C18H32O3	Densipolic acid	296.235	-	-
						C22H43O2N2	C18H32O3	Dimorphecolic acid	296.235	-	-
234	20.8876	1212.02	343.332	347.357	178151	C20H43O2N2	C16H32O3	Hexadecanoic acid, 14-hydroxy-, L-	272.235	-	-
						C20H43O2N2	C16H32O3	Jalapinolic acid	272.235	-	-
						C20H43O2N2	C16H32O3	(+)-15S-Hydroxy-hexadecanoic acid	272.235	-	-
						C20H43O2N2	C16H32O3	11-Hydroxy palmitic acid	272.235	-	-
						C20H43O2N2	C16H32O3	11S-Hydroxy-hexadecanoic acid	272.235	-	-
						C20H43O2N2	C16H32O3	14-Hydroxy palmitic acid	272.235	-	-
						C20H43O2N2	C16H32O3	14S-Hydroxy-hexadecanoic acid	272.235	-	-
						C20H43O2N2	C16H32O3	15-Hydroxy-hexadecanoic acid	272.235	-	-
						C20H43O2N2	C16H32O3	16-Hydroxy hexadecanoic acid	272.235	C18218	506-13-8
						C20H43O2N2	C16H32O3	2-Hydroxy palmitic acid	272.235	-	-
						C20H43O2N2	C16H32O3	3-Hydroxy-hexadecanoic acid	272.235	-	928-17-6
						C20H43O2N2	C16H32O3	3R-Hydroxypalmitic acid	272.235	-	-
						C20H43O2N2	C16H32O3	3S-Hydroxypalmitic acid	272.235	-	-
						C20H43O2N2	C16H32O3	4-Hydroxy palmitic acid	272.235	-	-
						C20H43O2N2	C16H32O3	5-Hydroxy-hexadecanoic acid	272.235	-	-
						C20H43O2N2	C16H32O3	5R-Hydroxy-hexadecanoic acid	272.235	-	-
						C20H43O2N2	C16H32O3	5S-Hydroxy-hexadecanoic acid	272.235	-	-
						C20H43O2N2	C16H32O3	7R-Hydroxy-hexadecanoic acid	272.235	-	-
						C20H43O2N2	C16H32O3	8S-Hydroxy-hexadecanoic acid	272.235	-	-
						C20H43O2N2	C16H32O3	9-Methoxy-pentadecanoic acid	272.235	-	-
						C20H43O2N2	C16H32O3	Hexadecanoic acid, 15-hydroxy-, L-	272.235	-	-
235	21.1432	1219.52	319.274	323.3	94145.3	C20H35ON2	C16H24O2	16:4(4Z,7Z,10Z,13Z)	248.178	-	-
						C20H35ON2	C16H24O2	16:4(6,9,12,15)	248.178	-	-
						C20H35ON2	C16H24O2	16:4(6Z,9Z,12Z,15Z)	248.178	-	-
						C20H35ON2	C16H24O2	2E,6Z,8Z,12E-Hexadecatetraenoic acid	248.178	-	-
						C20H35ON2	C16H24O2	2E,6Z,8Z,12Z-Hexadecatetraenoic acid	248.178	-	-
						C20H35ON2	C16H24O2	2Z,6Z,8Z,12E-Hexadecatetraenoic acid	248.178	-	-
						C20H35ON2	C16H24O2	2Z,6Z,8Z,12Z-Hexadecatetraenoic acid	248.178	-	-
						C20H35ON2	C16H24O2	4,7,10,13-Hexadecatetraenoic acid	248.178	-	-
						C20H35ON2	C16H24O2	4,7,11,14-Hexadecatetraenoic acid	248.178	-	-
						C20H35ON2	C16H24O2	4,8,12,16-Hexadecatetraenoic acid	248.178	-	-
						C20H35ON2	C16H24O2	4-[3]-Ladderane-butanoic acid	248.178	-	-
						C20H35ON2	C16H24O2	4Z,7Z,10Z,13Z-Hexadecatetraenoic acid	248.178	-	-
						C20H35ON2	C16H24O2	6,9,12,15-Hexadecatetraenoic acid	248.178	-	-
						C20H35ON2	C16H24O2	C16:4n-0,4,8,12	248.178	-	-
						C20H35ON2	C16H24O2	C16:4n-2,5,9,12	248.178	-	-
236	21.1342	1223.21	407.327	411.351	67814.9	C24H43O3N2	C20H32O4	(14S)-14,15-Dihydroxy-8(17),13(16)-labdadien-19-oic acid	336.23	-	-
						C24H43O3N2	C20H32O4	10,11-Dihydro-12-oxo-LTB4	336.23	-	-
						C24H43O3N2	C20H32O4	11H-14,15-EETA	336.23	-	219535-29-2
						C24H43O3N2	C20H32O4	12(S)-HPETE	336.23	-	71774-10-2
						C24H43O3N2	C20H32O4	12(S)-Leukotriene B4	336.23	-	83709-73-3
						C24H43O3N2	C20H32O4	12,20-DiHETE	336.23	-	-
						C24H43O3N2	C20H32O4	14,15-DiHETE	336.23	-	-
						C24H43O3N2	C20H32O4	15(S)-HPETE	336.23	-	70981-96-3
						C24H43O3N2	C20H32O4	15H-11,12-EETA	336.23	-	877878-78-9
						C24H43O3N2	C20H32O4	17,18-DiHETE	336.23	-	-
						C24H43O3N2	C20H32O4	5,15-DiHETE	336.23	-	82200-87-1
						C24H43O3N2	C20H32O4	6,7-Dihydro-5-oxo-12-epi-LTB4	336.23	-	-
						C24H43O3N2	C20H32O4	6-Trans-12-epi-Leukotriene B4	336.23	-	71548-19-1
						C24H43O3N2	C20H32O4	6-Trans-Leukotriene B4	336.23	-	71652-82-9
						C24H43O3N2	C20H32O4	8,15-DiHETE	336.23	-	77667-08-4
						C24H43O3N2	C20H32O4	8-Iso-PGA1	336.23	-	-
						C24H43O3N2	C20H32O4	9-Deoxy-delta12-PGD2	336.23	-	-
						C24H43O3N2	C20H32O4	Ent-1(10)-Halimene-15,19-dioic acid	336.23	-	-
						C24H43O3N2	C20H32O4	Hepoxilin A3	336.23	-	85589-24-8
						C24H43O3N2	C20H32O4	Hepoxilin B3	336.23	-	-
						C24H43O3N2	C20H32O4	Leukotriene B4	336.23	-	71160-24-2
						C24H43O3N2	C20H32O4	Prostaglandin A1	336.23	-	14152-28-4
						C24H43O3N2	C20H32O4	Prostaglandin B1	336.23	-	13345-51-2
						C24H43O3N2	C20H32O4	Prostaglandin C1	336.23	-	-
237	21.1585	1224.1	367.332	371.357	749104	C22H43O2N2	C18H32O3	10-Keto-12Z-octadecenoic acid	296.235	-	-
						C22H43O2N2	C18H32O3	9(R)-HODE	296.235	-	10075-11-3
						C22H43O2N2	C18H32O3	9(S)-HODE	296.235	C14767	73543-67-6
						C22H43O2N2	C18H32O3	9-HODE	296.235	-	-
						C22H43O2N2	C18H32O3	(±)12(13)-EpOME	296.235	-	-
						C22H43O2N2	C18H32O3	(±)13-HODE	296.235	-	73804-64-5
						C22H43O2N2	C18H32O3	(±)9-HODE	296.235	-	98524-19-7
						C22H43O2N2	C18H32O3	(1R,2R)-3-Oxo-2-pentyl-cyclopentaneoctanoic acid	296.235	-	-
						C22H43O2N2	C18H32O3	(1S,2S)-3-Oxo-2-pentyl-cyclopentaneoctanoic acid	296.235	-	-
						C22H43O2N2	C18H32O3	(Z)-13-Oxo-9-octadecenoic acid	296.235	-	38205-11-7
						C22H43O2N2	C18H32O3	10R-HODE	296.235	-	-
						C22H43O2N2	C18H32O3	10S-HODE	296.235	-	-
						C22H43O2N2	C18H32O3	12(13)-EpOME	296.235	C14826	-
						C22H43O2N2	C18H32O3	12,13-EpOME(9)	296.235	-	-
						C22H43O2N2	C18H32O3	12,13-Epoxy-9-octadecenoic acid	296.235	-	-
						C22H43O2N2	C18H32O3	12-Hydroxy-8,10-octadecadienoic acid	296.235	-	170171-31-0
						C22H43O2N2	C18H32O3	12-Oxo-10E-octadecenoic acid	296.235	-	-
						C22H43O2N2	C18H32O3	12-Oxo-10Z-octadecenoic acid	296.235	-	-
						C22H43O2N2	C18H32O3	12-Oxo-9E-octadecenoic acid	296.235	-	-
						C22H43O2N2	C18H32O3	12-Oxo-9Z-octadecenoic acid	296.235	-	-
						C22H43O2N2	C18H32O3	12-OxoOME(10E)	296.235	-	-
						C22H43O2N2	C18H32O3	12-OxoOME(10Z)	296.235	-	-
						C22H43O2N2	C18H32O3	12-OxoOME(9E)	296.235	-	-
						C22H43O2N2	C18H32O3	12-OxoOME(9Z)	296.235	-	-
						C22H43O2N2	C18H32O3	12R,13S-Epoxy-9Z-octadecenoic acid	296.235	C08368	-
						C22H43O2N2	C18H32O3	12R-HODE	296.235	-	-
						C22H43O2N2	C18H32O3	12R-Hydroxy-9Z,15Z-octadecadienoic acid	296.235	-	-
						C22H43O2N2	C18H32O3	12S,13R-EpOME	296.235	C08368	503-07-1
						C22H43O2N2	C18H32O3	13(R)-HODE	296.235	-	10219-69-9
						C22H43O2N2	C18H32O3	13(S)-HODE	296.235	C14762	29623-28-7
						C22H43O2N2	C18H32O3	13R-Hydroxy-9E,11Z-octadecadienoic acid	296.235	-	-
						C22H43O2N2	C18H32O3	13S-Hydroxy-9E,11Z-octadecadienoic acid	296.235	-	-
						C22H43O2N2	C18H32O3	18-Oxooleate	296.235	C19617	-
						C22H43O2N2	C18H32O3	2R-Hydroxy-linoleic acid	296.235	-	-
						C22H43O2N2	C18H32O3	6-HODE	296.235	-	-
						C22H43O2N2	C18H32O3	6-Hydroxy-9Z,12Z-octadecadienoic acid	296.235	-	-
						C22H43O2N2	C18H32O3	7-Methoxy-9-methyl-hexadeca-4E,8E-dienoic acid	296.235	-	-
						C22H43O2N2	C18H32O3	8R-HODE	296.235	-	-
						C22H43O2N2	C18H32O3	8S-HODE	296.235	C08318	-
						C22H43O2N2	C18H32O3	9,10-EpOME(12)	296.235	-	-
						C22H43O2N2	C18H32O3	9,10-Epoxy-12-octadecenoic acid	296.235	-	-
						C22H43O2N2	C18H32O3	9R,10S-EpOME	296.235	C14825	-
						C22H43O2N2	C18H32O3	9S-Hydroxy-10E,12E-octadecadienoic acid	296.235	-	-
						C22H43O2N2	C18H32O3	Alpha-artemisic acid	296.235	-	-
						C22H43O2N2	C18H32O3	Avenoleic acid	296.235	-	-
						C22H43O2N2	C18H32O3	Beta-Dimorphecolic acid	296.235	-	-
						C22H43O2N2	C18H32O3	Densipolic acid	296.235	-	-
						C22H43O2N2	C18H32O3	Dimorphecolic acid	296.235	-	-
238	21.35	1233.61	365.316	369.341	275378	C22H41O2N2	C18H30O3	(9E,11E)-13-Oxooctadeca-9,11-dienoic acid	294.219	-	-
						C22H41O2N2	C18H30O3	(9R,13R)-10,11-Dihydro-12-oxo-15-phytoenoic acid	294.219	-	-
						C22H41O2N2	C18H30O3	(9R,13R)-10-Oxo-11-phytoenoic acid	294.219	-	-
						C22H41O2N2	C18H30O3	(9R,13R)-15,16-Dihydro-12-oxo-10-phytoenoic acid	294.219	-	-
						C22H41O2N2	C18H30O3	(9S,13S)-10,11-Dihydro-12-oxo-15-phytoenoic acid	294.219	C04780	-
						C22H41O2N2	C18H30O3	(9S,13S)-10-Oxo-11-phytoenoic acid	294.219	-	-
						C22H41O2N2	C18H30O3	(9S,13S)-15,16-Dihydro-12-oxo-10-phytoenoic acid	294.219	-	-
						C22H41O2N2	C18H30O3	(9Z,12Z,14E)-16-Hydroxy-9,12,14-octadecatrienoic acid	294.219	-	81325-65-7
						C22H41O2N2	C18H30O3	12,13-Epoxy-9,15-octadecadienoic acid	294.219	-	88159-18-6
						C22H41O2N2	C18H30O3	12,13S-EpODE	294.219	C04594	-
						C22H41O2N2	C18H30O3	13(S)-HOTrE	294.219	C16316	87984-82-5
						C22H41O2N2	C18H30O3	13-HOTE	294.219	-	-
						C22H41O2N2	C18H30O3	13-OxoODE	294.219	C14765	54739-30-9
						C22H41O2N2	C18H30O3	13S-HOTrE(gamma)	294.219	-	74784-20-6
						C22H41O2N2	C18H30O3	15,16-Epoxy-9,12-octadecadienoic acid	294.219	-	-
						C22H41O2N2	C18H30O3	17-Hydroxylinolenic acid	294.219	C16346	-
						C22H41O2N2	C18H30O3	2-HoTrE	294.219	-	-
						C22H41O2N2	C18H30O3	2-Hydroxy-9Z,12Z,15Z-octadecatrienoic acid	294.219	-	-
						C22H41O2N2	C18H30O3	2-Hydroxylinolenic acid	294.219	-	-
						C22H41O2N2	C18H30O3	2R-Hydroxy-9Z,12Z,15Z-octadecatrienoic acid	294.219	-	-
						C22H41O2N2	C18H30O3	3,4-Dimethyl-5-pentyl-2-furanheptanoic acid	294.219	-	92745-17-0
						C22H41O2N2	C18H30O3	9(S)-HOTrE	294.219	C16326	89886-42-0
						C22H41O2N2	C18H30O3	9-HOTE	294.219	-	-
						C22H41O2N2	C18H30O3	9-Oxo-10,12-octadecadienoic acid	294.219	-	-
						C22H41O2N2	C18H30O3	9-OxoODE	294.219	C14766	54232-59-6
						C22H41O2N2	C18H30O3	9S,10-Epoxy-10,12Z-octadecadienoic acid	294.219	-	-
						C22H41O2N2	C18H30O3	Alpha-Kamlolenic acid	294.219	-	-
						C22H41O2N2	C18H30O3	Beta-Kamlolenic acid	294.219	-	-
						C22H41O2N2	C18H30O3	Colneleic acid	294.219	C19827	-
						C22H41O2N2	C18H30O3	α-12(13)-EpODE	294.219	-	-
						C22H41O2N2	C18H30O3	α-15(16)-EpODE	294.219	-	-
						C22H41O2N2	C18H30O3	α-9(10)-EpODE	294.219	-	-
						C22H41O2N2	C18H30O3	γ- 12(13)-EpODE	294.219	-	-
						C22H41O2N2	C18H30O3	γ- 6(7)-EpODE	294.219	-	-
						C22H41O2N2	C18H30O3	γ- 9(10)-EpODE	294.219	-	-
239	21.395	1236.64	415.332	419.357	215989	C26H43O2N2	C22H32O3	10-HDoHE	344.235	-	-
						C26H43O2N2	C22H32O3	11-HDoHE	344.235	-	-
						C26H43O2N2	C22H32O3	16(17)-EpDPE	344.235	-	-
						C26H43O2N2	C22H32O3	16-HDoHE	344.235	-	-
						C26H43O2N2	C22H32O3	17-HDoHE	344.235	-	90780-52-2
						C26H43O2N2	C22H32O3	19(20)-EpDPE	344.235	-	-
						C26H43O2N2	C22H32O3	20-HDoHE	344.235	-	-
						C26H43O2N2	C22H32O3	4-HDoHE	344.235	-	-
						C26H43O2N2	C22H32O3	7-HDoHE	344.235	-	-
						C26H43O2N2	C22H32O3	8-HDoHE	344.235	-	-
240	21.4423	1238.06	343.332	347.357	292461	C20H43O2N2	C16H32O3	Hexadecanoic acid, 14-hydroxy-, L-	272.235	-	-
						C20H43O2N2	C16H32O3	Jalapinolic acid	272.235	-	-
						C20H43O2N2	C16H32O3	(+)-15S-Hydroxy-hexadecanoic acid	272.235	-	-
						C20H43O2N2	C16H32O3	11-Hydroxy palmitic acid	272.235	-	-
						C20H43O2N2	C16H32O3	11S-Hydroxy-hexadecanoic acid	272.235	-	-
						C20H43O2N2	C16H32O3	14-Hydroxy palmitic acid	272.235	-	-
						C20H43O2N2	C16H32O3	14S-Hydroxy-hexadecanoic acid	272.235	-	-
						C20H43O2N2	C16H32O3	15-Hydroxy-hexadecanoic acid	272.235	-	-
						C20H43O2N2	C16H32O3	16-Hydroxy hexadecanoic acid	272.235	C18218	506-13-8
						C20H43O2N2	C16H32O3	2-Hydroxy palmitic acid	272.235	-	-
						C20H43O2N2	C16H32O3	3-Hydroxy-hexadecanoic acid	272.235	-	928-17-6
						C20H43O2N2	C16H32O3	3R-Hydroxypalmitic acid	272.235	-	-
						C20H43O2N2	C16H32O3	3S-Hydroxypalmitic acid	272.235	-	-
						C20H43O2N2	C16H32O3	4-Hydroxy palmitic acid	272.235	-	-
						C20H43O2N2	C16H32O3	5-Hydroxy-hexadecanoic acid	272.235	-	-
						C20H43O2N2	C16H32O3	5R-Hydroxy-hexadecanoic acid	272.235	-	-
						C20H43O2N2	C16H32O3	5S-Hydroxy-hexadecanoic acid	272.235	-	-
						C20H43O2N2	C16H32O3	7R-Hydroxy-hexadecanoic acid	272.235	-	-
						C20H43O2N2	C16H32O3	8S-Hydroxy-hexadecanoic acid	272.235	-	-
						C20H43O2N2	C16H32O3	9-Methoxy-pentadecanoic acid	272.235	-	-
						C20H43O2N2	C16H32O3	Hexadecanoic acid, 15-hydroxy-, L-	272.235	-	-
241	21.496	1240.44	391.332	395.357	195735	C24H43O2N2	C20H32O3	(±)12-HETE	320.235	C14777	54397-83-0
						C24H43O2N2	C20H32O3	(±)11-HETE	320.235	-	73804-65-6
						C24H43O2N2	C20H32O3	(±)15-HETE	320.235	-	73836-87-0
						C24H43O2N2	C20H32O3	(±)16-HETE	320.235	C14778	183509-22-0
242	21.5123	1241.39	341.316	345.341	284352	C20H41O2N2	C16H30O3	(+)-12-Hydroxy-9Z-hexadecenoic acid	270.219	-	-
						C20H41O2N2	C16H30O3	10-Keto palmitic acid	270.219	-	-
						C20H41O2N2	C16H30O3	10-Oxo-14-methyl-pentadecanoic acid	270.219	-	-
						C20H41O2N2	C16H30O3	11-Keto palmitic acid	270.219	-	-
						C20H41O2N2	C16H30O3	15-Oxo-hexadecanoic acid	270.219	-	-
						C20H41O2N2	C16H30O3	16-Hydroxy-5-hexadecenoic acid	270.219	-	-
						C20H41O2N2	C16H30O3	16-Hydroxy-6-hexadecenoic acid	270.219	-	-
						C20H41O2N2	C16H30O3	16-Hydroxy-9E-hexadecenoic acid	270.219	-	-
						C20H41O2N2	C16H30O3	16-Hydroxy-9Z-hexadecenoic acid	270.219	-	-
						C20H41O2N2	C16H30O3	16-Oxo-palmitate	270.219	C19614	-
						C20H41O2N2	C16H30O3	2-Keto palmitic acid	270.219	-	-
						C20H41O2N2	C16H30O3	3-Keto palmitic acid	270.219	-	-
						C20H41O2N2	C16H30O3	4-Keto palmitic acid	270.219	-	-
						C20H41O2N2	C16H30O3	5-Keto palmitic acid	270.219	-	-
						C20H41O2N2	C16H30O3	7-Keto palmitic acid	270.219	-	-
						C20H41O2N2	C16H30O3	8-Keto palmitic acid	270.219	-	-
						C20H41O2N2	C16H30O3	9-Hexadecenoic acid, 12-hydroxy-, (Z)-(+)-	270.219	-	-
						C20H41O2N2	C16H30O3	9-Keto palmitic acid	270.219	-	-
						C20H41O2N2	C16H30O3	Ambrettolic acid	270.219	-	-
						C20H41O2N2	C16H30O3	Delta5-Isoambrettolic acid	270.219	-	-
						C20H41O2N2	C16H30O3	Delta6-Isoambrettolic acid	270.219	-	-
243	21.5859	1245.19	315.301	319.326	326232	C18H39O2N2	C14H28O3	10-Hydroxy-tetradecanoic acid	244.204	-	-
						C18H39O2N2	C14H28O3	11-Hydroxy-tetradecanoic acid	244.204	-	-
						C18H39O2N2	C14H28O3	2-Hydroxymyristic Acid	244.204	-	2507-55-3
						C18H39O2N2	C14H28O3	3-Hydroxy-tetradecanoic acid	244.204	-	3422-31-9
						C18H39O2N2	C14H28O3	5-Hydroxy-tetradecanoic acid	244.204	-	-
						C18H39O2N2	C14H28O3	6-Hydroxy-tetradecanoic acid	244.204	-	-
						C18H39O2N2	C14H28O3	7-Hydroxytetradecanoic acid	244.204	-	-
						C18H39O2N2	C14H28O3	Omega-hydroxy myristic acid	244.204	-	-
						C18H39O2N2	C14H28O3	α-Hydroxy myristic acid	244.204	C13790	-
244	21.7636	1253.64	367.332	371.357	399772	C22H43O2N2	C18H32O3	10-Keto-12Z-octadecenoic acid	296.235	-	-
						C22H43O2N2	C18H32O3	9(R)-HODE	296.235	-	10075-11-3
						C22H43O2N2	C18H32O3	9(S)-HODE	296.235	C14767	73543-67-6
						C22H43O2N2	C18H32O3	9-HODE	296.235	-	-
						C22H43O2N2	C18H32O3	(±)12(13)-EpOME	296.235	-	-
						C22H43O2N2	C18H32O3	(±)13-HODE	296.235	-	73804-64-5
						C22H43O2N2	C18H32O3	(±)9-HODE	296.235	-	98524-19-7
						C22H43O2N2	C18H32O3	(1R,2R)-3-Oxo-2-pentyl-cyclopentaneoctanoic acid	296.235	-	-
						C22H43O2N2	C18H32O3	(1S,2S)-3-Oxo-2-pentyl-cyclopentaneoctanoic acid	296.235	-	-
						C22H43O2N2	C18H32O3	(Z)-13-Oxo-9-octadecenoic acid	296.235	-	38205-11-7
						C22H43O2N2	C18H32O3	10R-HODE	296.235	-	-
						C22H43O2N2	C18H32O3	10S-HODE	296.235	-	-
						C22H43O2N2	C18H32O3	12(13)-EpOME	296.235	C14826	-
						C22H43O2N2	C18H32O3	12,13-EpOME(9)	296.235	-	-
						C22H43O2N2	C18H32O3	12,13-Epoxy-9-octadecenoic acid	296.235	-	-
						C22H43O2N2	C18H32O3	12-Hydroxy-8,10-octadecadienoic acid	296.235	-	170171-31-0
						C22H43O2N2	C18H32O3	12-Oxo-10E-octadecenoic acid	296.235	-	-
						C22H43O2N2	C18H32O3	12-Oxo-10Z-octadecenoic acid	296.235	-	-
						C22H43O2N2	C18H32O3	12-Oxo-9E-octadecenoic acid	296.235	-	-
						C22H43O2N2	C18H32O3	12-Oxo-9Z-octadecenoic acid	296.235	-	-
						C22H43O2N2	C18H32O3	12-OxoOME(10E)	296.235	-	-
						C22H43O2N2	C18H32O3	12-OxoOME(10Z)	296.235	-	-
						C22H43O2N2	C18H32O3	12-OxoOME(9E)	296.235	-	-
						C22H43O2N2	C18H32O3	12-OxoOME(9Z)	296.235	-	-
						C22H43O2N2	C18H32O3	12R,13S-Epoxy-9Z-octadecenoic acid	296.235	C08368	-
						C22H43O2N2	C18H32O3	12R-HODE	296.235	-	-
						C22H43O2N2	C18H32O3	12R-Hydroxy-9Z,15Z-octadecadienoic acid	296.235	-	-
						C22H43O2N2	C18H32O3	12S,13R-EpOME	296.235	C08368	503-07-1
						C22H43O2N2	C18H32O3	13(R)-HODE	296.235	-	10219-69-9
						C22H43O2N2	C18H32O3	13(S)-HODE	296.235	C14762	29623-28-7
						C22H43O2N2	C18H32O3	13R-Hydroxy-9E,11Z-octadecadienoic acid	296.235	-	-
						C22H43O2N2	C18H32O3	13S-Hydroxy-9E,11Z-octadecadienoic acid	296.235	-	-
						C22H43O2N2	C18H32O3	18-Oxooleate	296.235	C19617	-
						C22H43O2N2	C18H32O3	2R-Hydroxy-linoleic acid	296.235	-	-
						C22H43O2N2	C18H32O3	6-HODE	296.235	-	-
						C22H43O2N2	C18H32O3	6-Hydroxy-9Z,12Z-octadecadienoic acid	296.235	-	-
						C22H43O2N2	C18H32O3	7-Methoxy-9-methyl-hexadeca-4E,8E-dienoic acid	296.235	-	-
						C22H43O2N2	C18H32O3	8R-HODE	296.235	-	-
						C22H43O2N2	C18H32O3	8S-HODE	296.235	C08318	-
						C22H43O2N2	C18H32O3	9,10-EpOME(12)	296.235	-	-
						C22H43O2N2	C18H32O3	9,10-Epoxy-12-octadecenoic acid	296.235	-	-
						C22H43O2N2	C18H32O3	9R,10S-EpOME	296.235	C14825	-
						C22H43O2N2	C18H32O3	9S-Hydroxy-10E,12E-octadecadienoic acid	296.235	-	-
						C22H43O2N2	C18H32O3	Alpha-artemisic acid	296.235	-	-
						C22H43O2N2	C18H32O3	Avenoleic acid	296.235	-	-
						C22H43O2N2	C18H32O3	Beta-Dimorphecolic acid	296.235	-	-
						C22H43O2N2	C18H32O3	Densipolic acid	296.235	-	-
						C22H43O2N2	C18H32O3	Dimorphecolic acid	296.235	-	-
245	21.9377	1261.95	535.41	539.435	313179	C31H55O5N2	C27H44O6	3Alpha,7alpha,12alpha,26-Tetrahydroxy-5beta-23E-cholestan-27-oic acid	464.314	-	-
						C31H55O5N2	C27H44O6	3α,6α,7α,12α-Tetrahydroxy-5β-cholest-24-en-26-oic aicd	464.314	-	-
246	22.1161	1268.76	321.29	325.315	108103	C20H37ON2	C16H26O2	16:3(6Z,9Z,12Z)	250.193	-	-
						C20H37ON2	C16H26O2	4,7,10-Hexadecatrienoic acid	250.193	-	-
						C20H37ON2	C16H26O2	5E,8E,11E-Hexadecatrienoic acid	250.193	-	-
						C20H37ON2	C16H26O2	6,9,12-Hexadecatrienoic acid	250.193	-	-
						C20H37ON2	C16H26O2	7,10,13-Hexadecatrienoic acid	250.193	-	-
						C20H37ON2	C16H26O2	7Z,10Z,13Z-Hexadecatrienoic acid	250.193	-	-
						C20H37ON2	C16H26O2	9,12,15-Hexadecatrienoic acid	250.193	-	-
						C20H37ON2	C16H26O2	C16:3n-1,4,7	250.193	-	-
						C20H37ON2	C16H26O2	C16:3n-4,7,10	250.193	-	-
						C20H37ON2	C16H26O2	C16:3n-5,8,11	250.193	-	-
						C20H37ON2	C16H26O2	C16:3n-6,9,12	250.193	-	-
						C20H37ON2	C16H26O2	C16:4n-3,6,9,12	250.193	-	-
						C20H37ON2	C16H26O2	Hiragonic acid	250.193	-	-
247	22.0912	1269.77	343.332	347.357	405038	C20H43O2N2	C16H32O3	Hexadecanoic acid, 14-hydroxy-, L-	272.235	-	-
						C20H43O2N2	C16H32O3	Jalapinolic acid	272.235	-	-
						C20H43O2N2	C16H32O3	(+)-15S-Hydroxy-hexadecanoic acid	272.235	-	-
						C20H43O2N2	C16H32O3	11-Hydroxy palmitic acid	272.235	-	-
						C20H43O2N2	C16H32O3	11S-Hydroxy-hexadecanoic acid	272.235	-	-
						C20H43O2N2	C16H32O3	14-Hydroxy palmitic acid	272.235	-	-
						C20H43O2N2	C16H32O3	14S-Hydroxy-hexadecanoic acid	272.235	-	-
						C20H43O2N2	C16H32O3	15-Hydroxy-hexadecanoic acid	272.235	-	-
						C20H43O2N2	C16H32O3	16-Hydroxy hexadecanoic acid	272.235	C18218	506-13-8
						C20H43O2N2	C16H32O3	2-Hydroxy palmitic acid	272.235	-	-
						C20H43O2N2	C16H32O3	3-Hydroxy-hexadecanoic acid	272.235	-	928-17-6
						C20H43O2N2	C16H32O3	3R-Hydroxypalmitic acid	272.235	-	-
						C20H43O2N2	C16H32O3	3S-Hydroxypalmitic acid	272.235	-	-
						C20H43O2N2	C16H32O3	4-Hydroxy palmitic acid	272.235	-	-
						C20H43O2N2	C16H32O3	5-Hydroxy-hexadecanoic acid	272.235	-	-
						C20H43O2N2	C16H32O3	5R-Hydroxy-hexadecanoic acid	272.235	-	-
						C20H43O2N2	C16H32O3	5S-Hydroxy-hexadecanoic acid	272.235	-	-
						C20H43O2N2	C16H32O3	7R-Hydroxy-hexadecanoic acid	272.235	-	-
						C20H43O2N2	C16H32O3	8S-Hydroxy-hexadecanoic acid	272.235	-	-
						C20H43O2N2	C16H32O3	9-Methoxy-pentadecanoic acid	272.235	-	-
						C20H43O2N2	C16H32O3	Hexadecanoic acid, 15-hydroxy-, L-	272.235	-	-
248	22.1066	1270.35	341.316	345.341	353651	C20H41O2N2	C16H30O3	(+)-12-Hydroxy-9Z-hexadecenoic acid	270.219	-	-
						C20H41O2N2	C16H30O3	10-Keto palmitic acid	270.219	-	-
						C20H41O2N2	C16H30O3	10-Oxo-14-methyl-pentadecanoic acid	270.219	-	-
						C20H41O2N2	C16H30O3	11-Keto palmitic acid	270.219	-	-
						C20H41O2N2	C16H30O3	15-Oxo-hexadecanoic acid	270.219	-	-
						C20H41O2N2	C16H30O3	16-Hydroxy-5-hexadecenoic acid	270.219	-	-
						C20H41O2N2	C16H30O3	16-Hydroxy-6-hexadecenoic acid	270.219	-	-
						C20H41O2N2	C16H30O3	16-Hydroxy-9E-hexadecenoic acid	270.219	-	-
						C20H41O2N2	C16H30O3	16-Hydroxy-9Z-hexadecenoic acid	270.219	-	-
						C20H41O2N2	C16H30O3	16-Oxo-palmitate	270.219	C19614	-
						C20H41O2N2	C16H30O3	2-Keto palmitic acid	270.219	-	-
						C20H41O2N2	C16H30O3	3-Keto palmitic acid	270.219	-	-
						C20H41O2N2	C16H30O3	4-Keto palmitic acid	270.219	-	-
						C20H41O2N2	C16H30O3	5-Keto palmitic acid	270.219	-	-
						C20H41O2N2	C16H30O3	7-Keto palmitic acid	270.219	-	-
						C20H41O2N2	C16H30O3	8-Keto palmitic acid	270.219	-	-
						C20H41O2N2	C16H30O3	9-Hexadecenoic acid, 12-hydroxy-, (Z)-(+)-	270.219	-	-
						C20H41O2N2	C16H30O3	9-Keto palmitic acid	270.219	-	-
						C20H41O2N2	C16H30O3	Ambrettolic acid	270.219	-	-
						C20H41O2N2	C16H30O3	Delta5-Isoambrettolic acid	270.219	-	-
						C20H41O2N2	C16H30O3	Delta6-Isoambrettolic acid	270.219	-	-
249	22.1157	1270.45	329.28	333.305	87308.2	C18H37O3N2	C14H26O4	2-Methyl-tridecanedioic acid	258.183	-	-
						C18H37O3N2	C14H26O4	3-Methyl-tridecanedioic acid	258.183	-	-
						C18H37O3N2	C14H26O4	4-Methyl-tridecanedioic acid	258.183	-	-
						C18H37O3N2	C14H26O4	Tetradecanedioic acid	258.183	-	821-38-5
250	22.1314	1271.04	285.29	289.315	3.91213e+06	C17H37ON2	C13H26O2	(+)-10-Methyl lauric acid	214.193	-	7416-57-1
						C17H37ON2	C13H26O2	11:0(10Me,10Me)	214.193	-	-
						C17H37ON2	C13H26O2	2,6-Dimethyl-undecanoic acid	214.193	-	-
						C17H37ON2	C13H26O2	2-Methyl lauric acid	214.193	-	7613-20-9
						C17H37ON2	C13H26O2	2R-Methyl-dodecanoic acid	214.193	-	-
						C17H37ON2	C13H26O2	3-Methyl lauric acid	214.193	-	-
						C17H37ON2	C13H26O2	4-Methyl lauric acid	214.193	-	-
						C17H37ON2	C13H26O2	4S-Methyl-dodecanoic acid	214.193	-	-
						C17H37ON2	C13H26O2	5-Methyl lauric acid	214.193	-	-
						C17H37ON2	C13H26O2	6-Methyl lauric acid	214.193	-	-
						C17H37ON2	C13H26O2	7-Methyl lauric acid	214.193	-	-
						C17H37ON2	C13H26O2	8-Methyl lauric acid	214.193	-	-
						C17H37ON2	C13H26O2	9-Methyl lauric acid	214.193	-	-
						C17H37ON2	C13H26O2	Dodecanoic acid, 2-methyl-, (R)-	214.193	-	-
						C17H37ON2	C13H26O2	Isoundecylic acid	214.193	-	25448-24-2
						C17H37ON2	C13H26O2	Tridecanoic acid	214.193	C17076	638-53-9
251	22.127	1271.23	295.274	299.299	99734.3	C18H35ON2	C14H24O2	10Z,12E-Tetradecadienoic acid	224.178	-	-
						C18H35ON2	C14H24O2	14:2(6,9)	224.178	-	-
						C18H35ON2	C14H24O2	2E,4E-Tetradecadienoic acid	224.178	-	-
						C18H35ON2	C14H24O2	3,4-Tetradecadienoic acid	224.178	-	-
						C18H35ON2	C14H24O2	3E,5Z-Tetradecadienoic acid	224.178	-	-
						C18H35ON2	C14H24O2	3Z,5E-Tetradecadienoic acid	224.178	-	-
						C18H35ON2	C14H24O2	3Z,5Z-Tetradecadienoic acid	224.178	-	-
						C18H35ON2	C14H24O2	5,8-Tetradecadienoic acid	224.178	-	-
						C18H35ON2	C14H24O2	5Z,8Z-Tetradecadienoic acid	224.178	-	-
						C18H35ON2	C14H24O2	Alepric acid	224.178	-	-
						C18H35ON2	C14H24O2	C14:2n-10,11	224.178	-	-
						C18H35ON2	C14H24O2	C14:2n-10,12	224.178	-	-
						C18H35ON2	C14H24O2	C14:2n-2,4	224.178	-	-
						C18H35ON2	C14H24O2	Goshuyic acid	224.178	-	39039-37-7
252	22.1367	1271.8	329.316	333.341	416388	C19H41O2N2	C15H30O3	15-Hydroxy-pentadecanoic acid	258.219	-	-
						C19H41O2N2	C15H30O3	2-Hydroxy-pentadecanoic acid	258.219	-	-
						C19H41O2N2	C15H30O3	3-Hydroxy-pentadecanoic acid	258.219	-	-
						C19H41O2N2	C15H30O3	3R-Hydroxy-pentadecanoic acid	258.219	-	-
						C19H41O2N2	C15H30O3	3S-Hydroxy-pentadecanoic acid	258.219	-	-
						C19H41O2N2	C15H30O3	4-Hydroxy-pentadecanoic acid	258.219	-	-
						C19H41O2N2	C15H30O3	Convolvulinolic acid	258.219	-	-
						C19H41O2N2	C15H30O3	Pentadecanoic acid, 2-hydroxy-, (R)-	258.219	-	-
						C19H41O2N2	C15H30O3	Pentadecanoic acid, 3-hydroxy-, (R)-	258.219	-	-
						C19H41O2N2	C15H30O3	Pentadecanoic acid, 3-hydroxy-, (S)-	258.219	-	-
						C19H41O2N2	C15H30O3	2R-Hydroxy-pentadecanoic acid	258.219	-	-
253	22.1669	1273.12	363.301	367.325	451422	C22H39O2N2	C18H28O3	(9R,13R)-12-Oxo-phytodienoic acid	292.204	C13816	-
						C22H39O2N2	C18H28O3	10-OPDA	292.204	C16325	-
						C22H39O2N2	C18H28O3	12,13S-Epoxy-9Z,11,15Z-octadecatrienoic acid	292.204	C04672	-
						C22H39O2N2	C18H28O3	12-OPDA	292.204	C01226	85551-10-6
						C22H39O2N2	C18H28O3	12-Oxo-PDA	292.204	-	-
						C22H39O2N2	C18H28O3	13-Epi-12-oxo Phytodienoic Acid	292.204	-	71606-07-0
						C22H39O2N2	C18H28O3	13-Keto-9Z,11E,15Z-octadecatrienoic acid	292.204	-	-
						C22H39O2N2	C18H28O3	9,10-EOT	292.204	C16324	-
						C22H39O2N2	C18H28O3	9-OxoOTrE	292.204	-	125559-74-2
						C22H39O2N2	C18H28O3	Colnelenic acid	292.204	C16320	52591-16-9
						C22H39O2N2	C18H28O3	Etherolenic acid	292.204	C16319	-
254	22.2102	1275.12	305.259	309.284	404982	C19H33ON2	C15H22O2	(Z)-Alpha-Bergamotenoic acid	234.162	-	124439-27-6
						C19H33ON2	C15H22O2	Beta-Costic acid	234.162	-	3650-43-9
						C19H33ON2	C15H22O2	Beta-Santalic acid	234.162	-	73590-17-7
						C19H33ON2	C15H22O2	Germacrene A acid	234.162	C19678	-
						C19H33ON2	C15H22O2	Macrophyllic acid A	234.162	-	-
						C19H33ON2	C15H22O2	Sclerosporin	234.162	C09721	66419-03-2
						C19H33ON2	C15H22O2	Valerenic acid	234.162	C09743	-
255	22.2231	1275.7	431.327	435.352	670118	C26H43O3N2	C22H32O4	10(S),17(S)-DiHDoHE	360.23	-	871826-47-0
						C26H43O3N2	C22H32O4	10S,17S-DiHDoHE	360.23	-	-
						C26H43O3N2	C22H32O4	14R,21R-diHDHA	360.23	-	-
						C26H43O3N2	C22H32O4	14R,21S-diHDHA	360.23	-	-
						C26H43O3N2	C22H32O4	14S,21R-diHDHA	360.23	-	-
						C26H43O3N2	C22H32O4	14S,21S-diHDHA	360.23	-	-
						C26H43O3N2	C22H32O4	15(R)-Iloprost	360.23	-	85026-51-3
						C26H43O3N2	C22H32O4	15-Trans-Neuroprotectin-D1	360.23	-	-
						C26H43O3N2	C22H32O4	16(R)-Iloprost	360.23	-	-
						C26H43O3N2	C22H32O4	16(S)-Iloprost	360.23	-	74843-14-4
						C26H43O3N2	C22H32O4	17R-HpDHA	360.23	-	-
						C26H43O3N2	C22H32O4	5-Cis Iloprost	360.23	-	-
						C26H43O3N2	C22H32O4	7(R)-Maresin 1	360.23	-	1268720-28-0
						C26H43O3N2	C22H32O4	7(S)-Maresin 1	360.23	-	-
						C26H43O3N2	C22H32O4	7,9,13,17-Tetramethyl-7S,14S-dihydroxy-2E,4E,8E,10E,12E,16-octadecahexaenoic acid	360.23	-	-
						C26H43O3N2	C22H32O4	Iloprost	360.23	-	78919-13-8
						C26H43O3N2	C22H32O4	Resolvin D6	360.23	-	-
256	22.4158	1285.07	365.316	369.34	770404	C22H41O2N2	C18H30O3	(9E,11E)-13-Oxooctadeca-9,11-dienoic acid	294.219	-	-
						C22H41O2N2	C18H30O3	(9R,13R)-10,11-Dihydro-12-oxo-15-phytoenoic acid	294.219	-	-
						C22H41O2N2	C18H30O3	(9R,13R)-10-Oxo-11-phytoenoic acid	294.219	-	-
						C22H41O2N2	C18H30O3	(9R,13R)-15,16-Dihydro-12-oxo-10-phytoenoic acid	294.219	-	-
						C22H41O2N2	C18H30O3	(9S,13S)-10,11-Dihydro-12-oxo-15-phytoenoic acid	294.219	C04780	-
						C22H41O2N2	C18H30O3	(9S,13S)-10-Oxo-11-phytoenoic acid	294.219	-	-
						C22H41O2N2	C18H30O3	(9S,13S)-15,16-Dihydro-12-oxo-10-phytoenoic acid	294.219	-	-
						C22H41O2N2	C18H30O3	(9Z,12Z,14E)-16-Hydroxy-9,12,14-octadecatrienoic acid	294.219	-	81325-65-7
						C22H41O2N2	C18H30O3	12,13-Epoxy-9,15-octadecadienoic acid	294.219	-	88159-18-6
						C22H41O2N2	C18H30O3	12,13S-EpODE	294.219	C04594	-
						C22H41O2N2	C18H30O3	13(S)-HOTrE	294.219	C16316	87984-82-5
						C22H41O2N2	C18H30O3	13-HOTE	294.219	-	-
						C22H41O2N2	C18H30O3	13-OxoODE	294.219	C14765	54739-30-9
						C22H41O2N2	C18H30O3	13S-HOTrE(gamma)	294.219	-	74784-20-6
						C22H41O2N2	C18H30O3	15,16-Epoxy-9,12-octadecadienoic acid	294.219	-	-
						C22H41O2N2	C18H30O3	17-Hydroxylinolenic acid	294.219	C16346	-
						C22H41O2N2	C18H30O3	2-HoTrE	294.219	-	-
						C22H41O2N2	C18H30O3	2-Hydroxy-9Z,12Z,15Z-octadecatrienoic acid	294.219	-	-
						C22H41O2N2	C18H30O3	2-Hydroxylinolenic acid	294.219	-	-
						C22H41O2N2	C18H30O3	2R-Hydroxy-9Z,12Z,15Z-octadecatrienoic acid	294.219	-	-
						C22H41O2N2	C18H30O3	3,4-Dimethyl-5-pentyl-2-furanheptanoic acid	294.219	-	92745-17-0
						C22H41O2N2	C18H30O3	9(S)-HOTrE	294.219	C16326	89886-42-0
						C22H41O2N2	C18H30O3	9-HOTE	294.219	-	-
						C22H41O2N2	C18H30O3	9-Oxo-10,12-octadecadienoic acid	294.219	-	-
						C22H41O2N2	C18H30O3	9-OxoODE	294.219	C14766	54232-59-6
						C22H41O2N2	C18H30O3	9S,10-Epoxy-10,12Z-octadecadienoic acid	294.219	-	-
						C22H41O2N2	C18H30O3	Alpha-Kamlolenic acid	294.219	-	-
						C22H41O2N2	C18H30O3	Beta-Kamlolenic acid	294.219	-	-
						C22H41O2N2	C18H30O3	Colneleic acid	294.219	C19827	-
						C22H41O2N2	C18H30O3	α-12(13)-EpODE	294.219	-	-
						C22H41O2N2	C18H30O3	α-15(16)-EpODE	294.219	-	-
						C22H41O2N2	C18H30O3	α-9(10)-EpODE	294.219	-	-
						C22H41O2N2	C18H30O3	γ- 12(13)-EpODE	294.219	-	-
						C22H41O2N2	C18H30O3	γ- 6(7)-EpODE	294.219	-	-
						C22H41O2N2	C18H30O3	γ- 9(10)-EpODE	294.219	-	-
257	22.478	1288.8	327.337	331.362	446387	C20H43ON2	C16H32O2	Palmitic acid	256.24	C00249	57-10-3
						C20H43ON2	C16H32O2	Isopalmitic acid	256.24	-	32844-67-0
258	22.7028	1298.12	389.316	393.341	83580.7	C24H41O2N2	C20H30O3	15-HEPE	318.219	-	97850-14-1
						C24H41O2N2	C20H30O3	18R-HEPE	318.219	C18177	-
						C24H41O2N2	C20H30O3	Leukotriene A4	318.219	C00909	72059-45-1
						C24H41O2N2	C20H30O3	(±)11-HEPE	318.219	-	99217-78-4
						C24H41O2N2	C20H30O3	(±)12-HEPE	318.219	-	81187-21-5
						C24H41O2N2	C20H30O3	(±)15-HEPE	318.219	-	88852-33-9
						C24H41O2N2	C20H30O3	(±)18-HEPE	318.219	-	141110-17-0
						C24H41O2N2	C20H30O3	(±)5-HEPE	318.219	-	83952-40-3
						C24H41O2N2	C20H30O3	(±)8-HEPE	318.219	-	-
						C24H41O2N2	C20H30O3	(±)9-HEPE	318.219	-	-
						C24H41O2N2	C20H30O3	11(12)-EpETE	318.219	-	504435-15-8
						C24H41O2N2	C20H30O3	11-Oxo-5E,8Z,12Z,14Z-Eicosatetraenoic acid	318.219	-	-
						C24H41O2N2	C20H30O3	12-Oxo-5Z,8Z,10E,14Z-eicosatetraenoic acid	318.219	-	-
						C24H41O2N2	C20H30O3	12-Oxo-ETE	318.219	C14807	108437-64-5
						C24H41O2N2	C20H30O3	14(15)-EpETE	318.219	-	131339-24-7
						C24H41O2N2	C20H30O3	14,15-LTA4	318.219	-	-
						C24H41O2N2	C20H30O3	15D-PGA1	318.219	-	-
						C24H41O2N2	C20H30O3	15-Oxo-ETE	318.219	C04577	81416-72-0
						C24H41O2N2	C20H30O3	17(18)-EpETE	318.219	-	-
						C24H41O2N2	C20H30O3	17R,18S-EpETE	318.219	C13843	-
						C24H41O2N2	C20H30O3	2-Hydroxy-6-(8-tridecenyl)benzoic acid	318.219	-	88640-88-4
						C24H41O2N2	C20H30O3	4,5-LTA4	318.219	C02645	-
						C24H41O2N2	C20H30O3	5,7,11,14-Eicosatetraenoic acid, 9-oxo-, (E,Z,Z,Z)-	318.219	-	-
						C24H41O2N2	C20H30O3	5,8,12,14-Eicosatetraenoic acid, 11-oxo-, (E,Z,Z,Z)-	318.219	-	-
						C24H41O2N2	C20H30O3	5,9,11,14-Eicosatetraenoic acid, 8-oxo-, (E,Z,Z,Z)-	318.219	-	-
						C24H41O2N2	C20H30O3	5-Ketoeicosatetraenoic acid	318.219	-	-
						C24H41O2N2	C20H30O3	5-Oxo-ETE	318.219	C14732	106154-18-1
						C24H41O2N2	C20H30O3	8(9)-EpETE	318.219	-	851378-93-3
						C24H41O2N2	C20H30O3	8-Oxo-5E,9Z,11Z,14Z-eicosatetraenoic acid	318.219	-	-
						C24H41O2N2	C20H30O3	9-Hydroxy-2Z,5E,7Z,11Z,14Z-Eicosapentaenoic acid	318.219	-	-
						C24H41O2N2	C20H30O3	9-Oxo-5E,7Z,11Z,14Z-eicosatetraenoic acid	318.219	-	-
						C24H41O2N2	C20H30O3	CAY10410	318.219	-	-
						C24H41O2N2	C20H30O3	Ent-17-Hydroxy-15-kauren-19-oic acid	318.219	-	35030-38-7
						C24H41O2N2	C20H30O3	Ent-7α-Hydroxykaur-16-en-19-oic acid	318.219	C11875	21435-01-8
						C24H41O2N2	C20H30O3	Grandifloric acid	318.219	C17956	22338-69-8
						C24H41O2N2	C20H30O3	Steviol	318.219	-	471-80-7
259	22.8058	1304.74	343.332	347.357	1.15699e+06	C20H43O2N2	C16H32O3	Hexadecanoic acid, 14-hydroxy-, L-	272.235	-	-
						C20H43O2N2	C16H32O3	Jalapinolic acid	272.235	-	-
						C20H43O2N2	C16H32O3	(+)-15S-Hydroxy-hexadecanoic acid	272.235	-	-
						C20H43O2N2	C16H32O3	11-Hydroxy palmitic acid	272.235	-	-
						C20H43O2N2	C16H32O3	11S-Hydroxy-hexadecanoic acid	272.235	-	-
						C20H43O2N2	C16H32O3	14-Hydroxy palmitic acid	272.235	-	-
						C20H43O2N2	C16H32O3	14S-Hydroxy-hexadecanoic acid	272.235	-	-
						C20H43O2N2	C16H32O3	15-Hydroxy-hexadecanoic acid	272.235	-	-
						C20H43O2N2	C16H32O3	16-Hydroxy hexadecanoic acid	272.235	C18218	506-13-8
						C20H43O2N2	C16H32O3	2-Hydroxy palmitic acid	272.235	-	-
						C20H43O2N2	C16H32O3	3-Hydroxy-hexadecanoic acid	272.235	-	928-17-6
						C20H43O2N2	C16H32O3	3R-Hydroxypalmitic acid	272.235	-	-
						C20H43O2N2	C16H32O3	3S-Hydroxypalmitic acid	272.235	-	-
						C20H43O2N2	C16H32O3	4-Hydroxy palmitic acid	272.235	-	-
						C20H43O2N2	C16H32O3	5-Hydroxy-hexadecanoic acid	272.235	-	-
						C20H43O2N2	C16H32O3	5R-Hydroxy-hexadecanoic acid	272.235	-	-
						C20H43O2N2	C16H32O3	5S-Hydroxy-hexadecanoic acid	272.235	-	-
						C20H43O2N2	C16H32O3	7R-Hydroxy-hexadecanoic acid	272.235	-	-
						C20H43O2N2	C16H32O3	8S-Hydroxy-hexadecanoic acid	272.235	-	-
						C20H43O2N2	C16H32O3	9-Methoxy-pentadecanoic acid	272.235	-	-
						C20H43O2N2	C16H32O3	Hexadecanoic acid, 15-hydroxy-, L-	272.235	-	-
260	22.8148	1305.45	341.316	345.341	352609	C20H41O2N2	C16H30O3	(+)-12-Hydroxy-9Z-hexadecenoic acid	270.219	-	-
						C20H41O2N2	C16H30O3	10-Keto palmitic acid	270.219	-	-
						C20H41O2N2	C16H30O3	10-Oxo-14-methyl-pentadecanoic acid	270.219	-	-
						C20H41O2N2	C16H30O3	11-Keto palmitic acid	270.219	-	-
						C20H41O2N2	C16H30O3	15-Oxo-hexadecanoic acid	270.219	-	-
						C20H41O2N2	C16H30O3	16-Hydroxy-5-hexadecenoic acid	270.219	-	-
						C20H41O2N2	C16H30O3	16-Hydroxy-6-hexadecenoic acid	270.219	-	-
						C20H41O2N2	C16H30O3	16-Hydroxy-9E-hexadecenoic acid	270.219	-	-
						C20H41O2N2	C16H30O3	16-Hydroxy-9Z-hexadecenoic acid	270.219	-	-
						C20H41O2N2	C16H30O3	16-Oxo-palmitate	270.219	C19614	-
						C20H41O2N2	C16H30O3	2-Keto palmitic acid	270.219	-	-
						C20H41O2N2	C16H30O3	3-Keto palmitic acid	270.219	-	-
						C20H41O2N2	C16H30O3	4-Keto palmitic acid	270.219	-	-
						C20H41O2N2	C16H30O3	5-Keto palmitic acid	270.219	-	-
						C20H41O2N2	C16H30O3	7-Keto palmitic acid	270.219	-	-
						C20H41O2N2	C16H30O3	8-Keto palmitic acid	270.219	-	-
						C20H41O2N2	C16H30O3	9-Hexadecenoic acid, 12-hydroxy-, (Z)-(+)-	270.219	-	-
						C20H41O2N2	C16H30O3	9-Keto palmitic acid	270.219	-	-
						C20H41O2N2	C16H30O3	Ambrettolic acid	270.219	-	-
						C20H41O2N2	C16H30O3	Delta5-Isoambrettolic acid	270.219	-	-
						C20H41O2N2	C16H30O3	Delta6-Isoambrettolic acid	270.219	-	-
261	22.8517	1306.22	323.306	327.331	100606	C20H39ON2	C16H28O2	(R)-Hydnocarpic acid	252.209	C16795	459-67-6
						C20H39ON2	C16H28O2	10-Hexadecynoic acid	252.209	-	-
						C20H39ON2	C16H28O2	10Z,12E-Hexadecadienoic acid	252.209	-	-
						C20H39ON2	C16H28O2	2E,4E-Hexadecadienoic acid	252.209	-	-
						C20H39ON2	C16H28O2	2E,4Z-Hexadecadienoic acid	252.209	-	-
						C20H39ON2	C16H28O2	2-Hexadecynoic acid	252.209	-	-
						C20H39ON2	C16H28O2	3Z,9Z-Hexadecadienoic acid	252.209	-	-
						C20H39ON2	C16H28O2	4-Hexadecynoic acid	252.209	-	-
						C20H39ON2	C16H28O2	5Z,9Z-Hexadecadienoic acid	252.209	-	-
						C20H39ON2	C16H28O2	6,9-Hexadecadienoic acid	252.209	-	-
						C20H39ON2	C16H28O2	6Z,9Z-Hexadecadienoic acid	252.209	-	-
						C20H39ON2	C16H28O2	7,10-Hexadecadienoic acid	252.209	-	-
						C20H39ON2	C16H28O2	7-Hexadecynoic acid; Palmitolic acid	252.209	-	-
						C20H39ON2	C16H28O2	7Z,10Z-Hexadecadienoic acid	252.209	-	-
						C20H39ON2	C16H28O2	8Z,10Z-Hexadecadienoic acid	252.209	-	-
						C20H39ON2	C16H28O2	9,12-Hexadecadienoic acid	252.209	-	-
						C20H39ON2	C16H28O2	9Z,12Z-Hexadecadienoic acid	252.209	-	-
						C20H39ON2	C16H28O2	C16:2n-12,14	252.209	-	-
						C20H39ON2	C16H28O2	C16:2n-4,6	252.209	-	-
						C20H39ON2	C16H28O2	C16:2n-4,7	252.209	-	-
						C20H39ON2	C16H28O2	C16:2n-6,8	252.209	-	-
						C20H39ON2	C16H28O2	C16:2n-7,13	252.209	-	-
						C20H39ON2	C16H28O2	Palmitolinoleic acid	252.209	-	-
262	22.9374	1311.93	321.29	325.315	996112	C20H37ON2	C16H26O2	16:3(6Z,9Z,12Z)	250.193	-	-
						C20H37ON2	C16H26O2	4,7,10-Hexadecatrienoic acid	250.193	-	-
						C20H37ON2	C16H26O2	5E,8E,11E-Hexadecatrienoic acid	250.193	-	-
						C20H37ON2	C16H26O2	6,9,12-Hexadecatrienoic acid	250.193	-	-
						C20H37ON2	C16H26O2	7,10,13-Hexadecatrienoic acid	250.193	-	-
						C20H37ON2	C16H26O2	7Z,10Z,13Z-Hexadecatrienoic acid	250.193	-	-
						C20H37ON2	C16H26O2	9,12,15-Hexadecatrienoic acid	250.193	-	-
						C20H37ON2	C16H26O2	C16:3n-1,4,7	250.193	-	-
						C20H37ON2	C16H26O2	C16:3n-4,7,10	250.193	-	-
						C20H37ON2	C16H26O2	C16:3n-5,8,11	250.193	-	-
						C20H37ON2	C16H26O2	C16:3n-6,9,12	250.193	-	-
						C20H37ON2	C16H26O2	C16:4n-3,6,9,12	250.193	-	-
						C20H37ON2	C16H26O2	Hiragonic acid	250.193	-	-
263	23.023	1318.19	503.421	507.446	136692	C31H55O3N2	C27H44O4	3-Oxo-7α-Hydroxy-5α-cholestan-26-oic acid	432.324	-	-
						C31H55O3N2	C27H44O4	3α,12α-Dihydroxy-5β-cholest-24-en-26-oic acid	432.324	-	-
						C31H55O3N2	C27H44O4	3α,7α-Dihydroxy-5β-cholest-23-en-26-oic acid	432.324	-	-
						C31H55O3N2	C27H44O4	3α,7α-Dihydroxy-5β-cholest-24-en-26-oic acid	432.324	-	-
						C31H55O3N2	C27H44O4	3α,7β-Dihydroxy-5β-cholest-24-en-26-oic acid	432.324	-	-
						C31H55O3N2	C27H44O4	3β,7α-Dihydroxy-5-cholestenoate	432.324	C17355	115538-84-6
						C31H55O3N2	C27H44O4	3β,7α-Dihydroxycholest-5-en-27-oic acid	432.324	-	-
264	23.1238	1322.03	329.28	333.305	92588.8	C18H37O3N2	C14H26O4	2-Methyl-tridecanedioic acid	258.183	-	-
						C18H37O3N2	C14H26O4	3-Methyl-tridecanedioic acid	258.183	-	-
						C18H37O3N2	C14H26O4	4-Methyl-tridecanedioic acid	258.183	-	-
						C18H37O3N2	C14H26O4	Tetradecanedioic acid	258.183	-	821-38-5
265	23.2134	1327.47	391.332	395.357	83935.3	C24H43O2N2	C20H32O3	(±)12-HETE	320.235	C14777	54397-83-0
						C24H43O2N2	C20H32O3	(±)11-HETE	320.235	-	73804-65-6
						C24H43O2N2	C20H32O3	(±)15-HETE	320.235	-	73836-87-0
						C24H43O2N2	C20H32O3	(±)16-HETE	320.235	C14778	183509-22-0
266	23.2971	1331.2	365.316	369.341	191850	C22H41O2N2	C18H30O3	(9E,11E)-13-Oxooctadeca-9,11-dienoic acid	294.219	-	-
						C22H41O2N2	C18H30O3	(9R,13R)-10,11-Dihydro-12-oxo-15-phytoenoic acid	294.219	-	-
						C22H41O2N2	C18H30O3	(9R,13R)-10-Oxo-11-phytoenoic acid	294.219	-	-
						C22H41O2N2	C18H30O3	(9R,13R)-15,16-Dihydro-12-oxo-10-phytoenoic acid	294.219	-	-
						C22H41O2N2	C18H30O3	(9S,13S)-10,11-Dihydro-12-oxo-15-phytoenoic acid	294.219	C04780	-
						C22H41O2N2	C18H30O3	(9S,13S)-10-Oxo-11-phytoenoic acid	294.219	-	-
						C22H41O2N2	C18H30O3	(9S,13S)-15,16-Dihydro-12-oxo-10-phytoenoic acid	294.219	-	-
						C22H41O2N2	C18H30O3	(9Z,12Z,14E)-16-Hydroxy-9,12,14-octadecatrienoic acid	294.219	-	81325-65-7
						C22H41O2N2	C18H30O3	12,13-Epoxy-9,15-octadecadienoic acid	294.219	-	88159-18-6
						C22H41O2N2	C18H30O3	12,13S-EpODE	294.219	C04594	-
						C22H41O2N2	C18H30O3	13(S)-HOTrE	294.219	C16316	87984-82-5
						C22H41O2N2	C18H30O3	13-HOTE	294.219	-	-
						C22H41O2N2	C18H30O3	13-OxoODE	294.219	C14765	54739-30-9
						C22H41O2N2	C18H30O3	13S-HOTrE(gamma)	294.219	-	74784-20-6
						C22H41O2N2	C18H30O3	15,16-Epoxy-9,12-octadecadienoic acid	294.219	-	-
						C22H41O2N2	C18H30O3	17-Hydroxylinolenic acid	294.219	C16346	-
						C22H41O2N2	C18H30O3	2-HoTrE	294.219	-	-
						C22H41O2N2	C18H30O3	2-Hydroxy-9Z,12Z,15Z-octadecatrienoic acid	294.219	-	-
						C22H41O2N2	C18H30O3	2-Hydroxylinolenic acid	294.219	-	-
						C22H41O2N2	C18H30O3	2R-Hydroxy-9Z,12Z,15Z-octadecatrienoic acid	294.219	-	-
						C22H41O2N2	C18H30O3	3,4-Dimethyl-5-pentyl-2-furanheptanoic acid	294.219	-	92745-17-0
						C22H41O2N2	C18H30O3	9(S)-HOTrE	294.219	C16326	89886-42-0
						C22H41O2N2	C18H30O3	9-HOTE	294.219	-	-
						C22H41O2N2	C18H30O3	9-Oxo-10,12-octadecadienoic acid	294.219	-	-
						C22H41O2N2	C18H30O3	9-OxoODE	294.219	C14766	54232-59-6
						C22H41O2N2	C18H30O3	9S,10-Epoxy-10,12Z-octadecadienoic acid	294.219	-	-
[truncated: 1,470 more rows]
